# Supplementary material for: Association of work-related stress with mental health problems in a special police force unit
Source: PubMed Central journal article supplement — BMJ Open. 2013 Jul 18;3(7):e002791. doi: 10.1136/bmjopen-2013-002791 (PMC3717472; doi:10.1136/bmjopen-2013-002791), 2013-07-18
Supplement: bmjopen-2013-002791.draft_revisions.pdf [file bmjopen-2013-002791.draft_revisions.pdf]

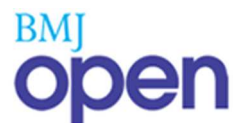

**Association of work-related stress with depression in a special police force. A cross-sectional study.**

|                                 |                                                                                                                                                                                                                                                                                                                                                           |
|---------------------------------|-----------------------------------------------------------------------------------------------------------------------------------------------------------------------------------------------------------------------------------------------------------------------------------------------------------------------------------------------------------|
| Journal:                        | <i>BMJ Open</i>                                                                                                                                                                                                                                                                                                                                           |
| Manuscript ID:                  | bmjopen-2013-002791                                                                                                                                                                                                                                                                                                                                       |
| Article Type:                   | Research                                                                                                                                                                                                                                                                                                                                                  |
| Date Submitted by the Author:   | 26-Feb-2013                                                                                                                                                                                                                                                                                                                                               |
| Complete List of Authors:       | Garbarino, Sergio; University of Genoa, Department of Neuroscience, Ophthalmology and Genetics<br>Cuomo, Giovanni; Ministry of the Interior, 1. State Police Health Service Department<br>Chiorri, Carlo; University of Genoa, Department of Educational Sciences, Psychology Unit,<br>Magnavita, Nicola; Università Cattolica Sacro Cuore, Public Health |
| <b>Primary Subject Heading</b>: | Occupational and environmental medicine                                                                                                                                                                                                                                                                                                                   |
| Secondary Subject Heading:      | Medical management, Public health, Mental health                                                                                                                                                                                                                                                                                                          |
| Keywords:                       | OCCUPATIONAL & INDUSTRIAL MEDICINE, Depression & mood disorders < PSYCHIATRY, PUBLIC HEALTH                                                                                                                                                                                                                                                               |
|                                 |                                                                                                                                                                                                                                                                                                                                                           |

SCHOLARONE™  
Manuscripts

1  
2  
3 1 **Association of work-related stress with depression in a special police force. A cross-sectional**  
4 2 **study.**  
5 3  
6  
7 4

8 5 **Garbarino Sergio<sup>1,2</sup>, Cuomo Giovanni<sup>2</sup>, Chiorri Carlo<sup>3</sup>, Magnavita Nicola<sup>4</sup>.**  
9 6  
10 7

- 11 8 1. State Police Health Service Department, Ministry of the Interior, Rome, Italy  
12 9 2. Department of Neuroscience, Ophthalmology and Genetics, University of Genoa, Genoa, Italy  
13 10 3. Department of Educational Sciences, Psychology Unit, University of Genoa, Genoa, Italy  
14 11 4. Department of Public Health, Occupational Health Unit, Università Cattolica del Sacro Cuore, Largo Gemelli 8, 00168 Roma,  
15 12 Italy. e-mail: nicolamagnavita@gmail.com

16 13 *Correspondence to:* N. Magnavita. Tel. +39-347-3300367, Fax: +39-06-61909399, e-mail [nicolamagnavita@gmail.com](mailto:nicolamagnavita@gmail.com):  
17 14 [nmagnavita@rm.unicatt.it](mailto:nmagnavita@rm.unicatt.it)  
18 15  
19 16  
20 17

21 18 **Type of contribution: Original**  
22 19

23 20 **Running title: Stress and depression in police**  
24 21

25 22 Word count:  
26 23

27 24 Abstract, word count: 178  
28 25

29 26 Tables: 3  
30 27

31 28 Figures: 0  
32 29

33 30 Funding: This research received no specific grant from any funding agency in the public,  
34 31 commercial or not-for-profit sectors.  
35 32

36 33 Competing interest: none declared. A complete declaration on competing interest will be signed by  
37 34 all authors before the publication of the paper.  
38 35

39 36 Author's contribution: GS carried out medical examinations on workers, CC administered the  
40 37 psychological tests, MN developed the statistical analyses and drafted the work, CG revised the  
41 38 work.  
42 39

43 40 Data sharing statement: Technical appendix, statistical code, and dataset available from the  
44 41 corresponding author at Dryad repository, who will provide a permanent, citable and open access  
45 42 home for the dataset.  
46 43  
47 44  
48 45  
49 46  
50 47  
51 48  
52 49  
53 50  
54 51  
55 52  
56 53  
57 54  
58 55  
59 56  
60 57

1  
2  
3 44 **Abstract**  
4  
5

6 45 **Objectives.** Law and order enforcement may expose policemen to significant psychosocial risk  
7  
8 46 factors, so that some subjects may find themselves in conditions of distress. The aim of this work is  
9  
10 47 to study the relationship between job stress and the presence of symptoms of depression and to  
11  
12 48 assess the risk of mental disorders in policemen.  
13

14  
15  
16 49 **Method:** 292 out of 294 components of the Genoa 'Mobile', a special police force engaged  
17  
18 50 exclusively in the enforcement of law and order, responded to our invitation to complete a  
19  
20 51 questionnaire for the assessment of work-related stress and depression.  
21  
22

23  
24 52 **Results:** Policemen who experience a discrepancy between work effort and rewards showed a  
25  
26 53 marked increase in the risk of self-reported depression (OR 7.00 95% CI 4.76 to 10.30) when  
27  
28 54 compared with their counterparts who do not undergo "distress".  
29  
30

31  
32 55 **Conclusions:** The prevalence of depressive symptoms in the observed population of policemen was  
33  
34 56 low, but not negligible. It would be in the interests not only of the workers themselves, but also of  
35  
36 57 the general population to take steps to prevent distress and improve the mental well-being of the  
37  
38 58 police.  
39

40  
41 59  
42  
43 60  
44  
45 61 **Keywords:** effort-reward imbalance, depression, distress, job strain, mental health, over-  
46  
47 62 commitment, police, social support, work-related stress.  
48  
49

50 63  
51  
52  
53  
54  
55  
56  
57  
58  
59  
60

1  
2  
3 64 **Article summary**

4  
5 65 *'Article focus'*

6  
7 66 (up to three bullet points on the research questions or hypotheses addressed)

8  
9 67 Mental health in the special police forces is critical. The policemen are exposed to acute and  
10 68 chronic stress and may become depressed. The impairment of the police officer can be a serious  
11 69 threat to the safety of the public.

12  
13  
14  
15  
16 70

17  
18 71 *'Key messages'*

19  
20 72 (up to three bullet points showing the key messages or significance of the study)

21  
22 73 The prevalence of depression in the police special forces is lower than that of the general population  
23 74 and other groups of policemen. Even in special forces, the distress is associated with depression.

24  
25 75 The prevention of distress and the treatment of depressive disorders among policemen are necessary  
26 76 for the safety of the workers and the public.

27  
28  
29  
30  
31  
32 77

33  
34 78 *'Strengths and limitations of this study'*

35  
36 79 This is a cross-sectional study, conducted on a small cohort. It was, however, obtained a very high  
37 80 participation in a group of policemen always in the front line, in the maintenance of public order.

38  
39  
40  
41 81  
42  
43  
44  
45  
46  
47  
48  
49  
50  
51  
52  
53  
54  
55  
56  
57  
58  
59  
60

## 82 Introduction

83

84 The impairment of the mental health of workers is an increasingly frequent consequence of  
85 contemporary working conditions. Direct financial costs due to absenteeism, presenteeism, reduced  
86 productivity and compensation are being added to the intangible costs arising from the suffering of  
87 workers. Alongside the ethical reasons for action, there are important economic considerations that  
88 point to/indicate the need for preventing depression. Skilled workers with qualifications acquired  
89 through expensive training and long experience are the most important asset of any company, i.e.  
90 their human capital. The premature loss of these workers through psychological trauma or illness is  
91 an economic as well as a human drama.

92 Some workers, particularly those employed in first responder organizations such as the police force,  
93 are particularly vulnerable to psychosocial stress. It is known that violent trauma can acutely induce  
94 posttraumatic stress disorder (PTSD) in workers <sup>1)</sup>. Accidents of this type rarely occur and the  
95 likelihood that a police officer may be exposed to an event severe enough to cause PTSD tends to  
96 be low <sup>2)</sup>. Nevertheless, officers are frequently exposed to violent events that, even if not  
97 immediately perceived as detrimental, can still induce maladaptive reactions in individuals <sup>3)</sup>. In  
98 addition to these operational work-related challenges, policemen may be subject to organizational  
99 problems that are common within hierarchical, male-dominated paramilitary structures such as the  
100 fire-fighting, ambulance and paramedic services <sup>4)</sup>. Daily organizational stressors may be more  
101 challenging than operational experiences, as we have observed in a previous study in which the  
102 levels of perceived stress in a group of policemen was higher during routine jobs than during a  
103 high-risk public event <sup>5)</sup>.

104 It is important to note that the pathophysiological reaction may be the same for completely different  
105 stimuli. Even if the “more recent” and advanced area of our brain (i.e. the medial-frontal cortex) is  
106 perfectly able to distinguish between the dramatic operational events and the chronic organizational

1  
2  
3 107 factors, the part of the brain that is responsible for/involved in neurophysiological response to  
4  
5 108 stress, i.e. the limbic system, makes no such distinction. Consequently, both a dramatic violent  
6  
7 109 event and a repeated and prolonged series of administrative events can cause an allostatic load, i.e. a  
8  
9 110 neurobiological maladaptive reaction characterized by behavioral, emotional and capacity changes  
10  
11 111 that goes under the name of “distress”. Distress, interacting with many different individual factors,  
12  
13 112 can induce the occurrence of mental illnesses such as anxiety, depression, burnout, conversion  
14  
15 113 disorder and other conditions classified in DSM IV.

16  
17  
18 114 Psychological injury resulting from work experience can be a gradual and progressive process that  
19  
20 115 erodes well-being over time. This gradual evolution often leaves the worker unaware of the  
21  
22 116 problem, or unwilling to acknowledge its importance, at least until the severity of the disease makes  
23  
24 117 it clear to colleagues, family, or both. The prevailing culture in the police force does not encourage  
25  
26 118 recognition of emotional damage caused by work, as it is considered a sign of weakness <sup>6)</sup>.

27  
28  
29 119 Consequently, people fail to seek professional help until the disease is so far advanced that it is  
30  
31 120 difficult to treat. It is for this reason that mental illness is the leading cause of retirement in the  
32  
33 121 police force <sup>7)</sup>.

34  
35  
36 122 The two leading models that have been used to describe and explain individual perception of stress  
37  
38 123 factors are the Demand/Control/Support (DCS) model, developed by Karasek <sup>8)</sup>, and the  
39  
40 124 Effort/Reward Imbalance (ERI) model, developed by Siegrist <sup>9)</sup>. The DCS model assumes that the  
41  
42 125 primary sources of job stress stem from two basic characteristics of the job itself: “job demand” and  
43  
44 126 “job control”. The model predicts that job strain is not simply a function of job demand, but also  
45  
46 127 depends on the amount of control the worker has over the work. Job demand takes into  
47  
48 128 consideration the pace and intensity of work: work overload, degree of difficulty, available time,  
49  
50 129 time allotted to executing tasks and the existence of contradictory or conflicting orders. Job decision  
51  
52 130 latitude, or job control, depends upon the worker’s ability to control his own activities and skill  
53  
54 131 usage. Social support at work, a moderating factor of job strain, was subsequently included in the

1  
2  
3 132 model. The ERI model puts emphasis more on the reward rather than the control structure of work,  
4  
5 133 suggesting that mental distress and its health correlates arise when a high degree of effort is not  
6  
7 134 adequately rewarded in the form of pay, esteem, status consistency or career opportunities. A  
8  
9 135 further assumption of this model involves individual differences in the perception of effort-reward  
10  
11 136 imbalance: people with a motivational pattern of excessive work-related commitment and high need  
12  
13 137 for approval (over-commitment) are at increased risk of strain <sup>9)</sup>. The Karasek model (DCS),  
14  
15 138 developed in the 1960s, appears to be more suitable for the physical aspects of occupational stress,  
16  
17 139 while Siegrist's model (ERI), designed for the tertiary society of the 1980s, is more sensitive to  
18  
19 140 stress arising from work relations and organizational factors <sup>10)</sup>.  
20  
21  
22  
23 141 'Distress' is an ill-defined term that refers to an unfavorable and unpleasant response to stress. Due  
24  
25 142 to such a vague definition, the prevalence of workers with distress ranges widely from 5% to 50%  
26  
27 143 in various studies <sup>11)</sup>. When distress reaches clinical relevance it is defined as "stress-related  
28  
29 144 disorder"; this term includes a variety of clinical conditions, including depression, which are  
30  
31 145 collectively labeled as "common mental disorders" (CMD). The prevalence of CMDs in the US  
32  
33 146 armed forces is 27% <sup>12)</sup> and there is a similar prevalence in the UK armed forces <sup>13)</sup>. Depression is  
34  
35 147 the most common diagnosis <sup>13)</sup>. In Europe it is estimated that the lifetime prevalence of mood  
36  
37 148 disorders is 14.0% and the one-year prevalence is 4.2% <sup>14)</sup>. Outside Europe, the prevalence of  
38  
39 149 severe distress with symptoms of depression or other mental problems is estimated to be at least  
40  
41 150 5%, but could be significantly higher <sup>15)</sup>. Distress and mental health problems caused by work are  
42  
43 151 very important for the performance of professional activity, especially in a very sensitive area such  
44  
45 152 as the police force, in which workers have weapons. The consequences of stress in police officers  
46  
47 153 can be particularly serious both on account of the increased risk of individual health problems, and  
48  
49 154 also the increased risk of impaired work performance that could jeopardize the safety and health of  
50  
51  
52  
53 155 the general population.  
54  
55  
56  
57  
58  
59  
60

1  
2  
3 156 The relationship between mental health and the work environment is complex and multifaceted: an  
4  
5 157 unfavorable work environment is associated with higher prevalence of mental disorders, and  
6  
7 158 employees with mental problems are generally less adaptable to their work environment.  
8  
9 159 The diagnosis of work-related mental disorders is of particular importance for three reasons. At the  
10  
11 160 macro (national) level, epidemiological monitoring can identify trends and help to indicate  
12  
13 161 preventive strategies. In Italy, for example, it is compulsory for all employers to assess stress in the  
14  
15 162 workplace and to provide appropriate preventive measures if necessary. At intermediate (company)  
16  
17 163 level, the identification of one or more cases of work-related mental disorders can stimulate or  
18  
19 164 enhance preventive action. At the individual level, the occupational physician may give specific  
20  
21 165 instructions to encourage the return to work or improve the quality of working life.  
22  
23 166 Investigating stress in police officers is particularly difficult because the latter are afraid of being  
24  
25 167 identified as individuals who have been compromised by stress. They fear that this might then cause  
26  
27 168 them to be discriminated against in their careers, removed from active duties and relegated to office  
28  
29 169 work. On the other hand, a study by Summerfield <sup>7)</sup> found work stress to be the first cause of  
30  
31 170 sickness absence and reduction in operational duties, as well as the leading cause of ill health  
32  
33 171 retirement in policemen. A number of studies have previously evaluated occupational stress in  
34  
35 172 policemen using the DCS and ERI models. Job strain and effort/reward imbalance were associated  
36  
37 173 with cardiovascular risk in policewomen <sup>16)</sup>, musculoskeletal disorders in special police forces <sup>17)</sup>,  
38  
39 174 lower mental health level in correctional police officers <sup>18)</sup> and urban police officers <sup>19)</sup>. Previous  
40  
41 175 studies on police officers have demonstrated that the demand-control model is a significant  
42  
43 176 predictor of professional efficiency and exhaustion <sup>20)</sup>, and that there is a complex interplay between  
44  
45 177 job demands, emotional exhaustion and other social and individual factors <sup>21)</sup>. Subjects with greater  
46  
47 178 perceived work stress in the first year of police service have greater depression symptoms 12  
48  
49 179 months later <sup>22)</sup>.  
50  
51  
52  
53  
54  
55  
56  
57  
58  
59  
60



1  
2  
3 180 The purpose of this study was to assess whether there is an association between a condition of  
4  
5 181 "distress" and the presence of self-reported symptoms of depression in a specialist or 'elite' unit of  
6  
7 182 the Italian police, the 'VI Reparto Mobile' of Genoa, a carefully selected group who is called to  
8  
9 183 maintain law and order in all the major events that happen in the country. The policemen in this  
10  
11 184 group work exclusively as First Responders; members are carefully selected among ordinary  
12  
13 185 officers and receive specific psychophysical and tactical training. Their routine work involves  
14  
15 186 ensuring order during sporting events, crowds and parades, natural and social emergencies, and also  
16  
17 187 they are often involved in public events in which there is a high risk of terrorist attacks and physical  
18  
19 188 fights. During a single riot, they are on duty for an average of 10 or more hours of work, have  
20  
21 189 physical fights for over an hour on average and often feel that they are in imminent danger of death.  
22  
23 190 They have a special and continuing education which aims to improve team spirit ("esprit de corp")  
24  
25 191 and increase the preparation to dramatic events. The decision to hold the 2009 G8 meeting in Italy  
26  
27 192 provided the opportunity for carrying out our present study. The police officers selected to ensure  
28  
29 193 law and order during this event were asked to undergo a thorough examination of their mental  
30  
31 194 health condition so that their conduct during the meeting could not be stigmatized.  
32  
33  
34  
35  
36  
37  
38  
39  
40  
41  
42  
43  
44  
45  
46  
47  
48  
49  
50  
51  
52  
53  
54  
55  
56  
57  
58  
59  
60

## 197 **Method**

### 199 *Participants*

200 The Italian special police force unit 'VI Reparto Mobile' of Genoa is composed of 294 members.  
201 Two policemen refused to take part in the study and one was unable to complete all the tests in the  
202 battery described in the next section and was therefore excluded. The participation rate was 99%.  
203 Since only two officers were female, gender differences could not be assessed and were therefore  
204 excluded from the analyses. Hence the final group of participants comprised 289 officers (see Table

1  
2  
3 205 1 below for descriptive statistics of the socio-demographic and work-related variables).  
4  
5 206 Occupational stress was measured using the validated Italian versions <sup>23)</sup> of two standardized  
6  
7 207 questionnaires: the DCS demand/control/support questionnaire, derived from the longer Job  
8  
9 208 Content Questionnaire <sup>8)</sup>, and the effort-reward imbalance questionnaire <sup>9)</sup>. The classic 17-item DCS  
10  
11 209 questionnaire consisted of 3 scales termed ‘psychological job demand’, ‘job control or decision  
12  
13 210 latitude’ and ‘workplace social support’. The ‘demand’ scale was the sum of 5 items (e.g. D1: “Do  
14  
15 211 you have to work very fast in your job?”) ( $\alpha = 0.71$ ), the ‘control’ scale was the sum of 6 items (e.g.  
16  
17 212 C1: “Do you have the opportunity to learn new things in your work?”) ( $\alpha = 0.65$ ), and the ‘support’  
18  
19 213 scale was the sum of 6 items (e.g. S1: “There is a calm and pleasant atmosphere where I work”) ( $\alpha$   
20  
21 214 = 0.84). Items were scored using a 4-point Likert scale in which the first two scales were graded  
22  
23 215 from 1=never to 4=often, while the third scale (support) was graded from 1=strong disagreement to  
24  
25 216 4=strong agreement. We followed the commonest method of obtaining a continuous variable,  
26  
27 217 termed “perceived job strain”, and divided demand by control (weighted by item numbers).  
28  
29 218 The 23-item ERI questionnaire contained two scales: ‘effort’, evaluated by 6 items (e.g. E1 “I have  
30  
31 219 constant time pressure due to a heavy workload”) ( $\alpha = 0.82$ ), and ‘reward’, evaluated by 11 items  
32  
33 220 (e.g. R1 “I receive the respect I deserve from my superior or equivalent person”) ( $\alpha = 0.89$ ). Both  
34  
35 221 were scored on a 5-point scale, where a value of 1 indicated no stressful experience and 5 indicated  
36  
37 222 a highly stressful experience. The weighted ratio between effort and reward was calculated to  
38  
39 223 quantify the degree of mismatch between effort and reward. Individuals who had a score greater than  
40  
41 224 one were considered to be stressed because they subjectively perceived a discrepancy between efforts and  
42  
43 225 results. The ERI questionnaire also included a third scale, ‘over-commitment’ which was evaluated  
44  
45 226 by 6 items on a 4-point Likert scale (e.g. O3 “When I get home, I can easily relax and ‘switch off’  
46  
47 227 work”) ( $\alpha = 0.79$ ). It measured the set of intrinsic personal factors regarding occupational  
48  
49 228 motivation and participation that enhance the effects of stress.  
50  
51  
52  
53  
54  
55  
56  
57  
58  
59  
60

1  
2  
3 229 Depression was evaluated by the Beck Depression Inventory (BDI)<sup>24</sup>, as this questionnaire  
4  
5 230 performed better than other tests for depression screening<sup>25,26</sup>. The BDI consists of 21 groups of 4  
6  
7 231 alternative self-evaluation statements used to assess the presence and severity of the affective,  
8  
9 232 cognitive, motivational, psychomotor, and vegetative components of depression, with higher scores  
10  
11 233 indicating more severe depression. If multiple responses are chosen under one item, the most  
12  
13 234 symptomatic item is scored. Statement choices are scored from 0 (absent) to 3 (severe) and can total  
14  
15 235 from 0 to 63. In this study internal consistency was 0.81. The cut-off score commonly used in  
16  
17 236 clinical practice for depression screening is 10<sup>27</sup>. The probability of suffering major depressive  
18  
19 237 disorder rapidly increases above this threshold; so, a higher score of 14<sup>25</sup> or 16<sup>26</sup> is often chosen  
20  
21 238 in order to reduce the prevalence of false positive in populations consisting of patients affected by  
22  
23 239 chronic diseases with poor or severe prognosis. In this study, we adopted the classical cut-off level  
24  
25 240 of 10, as the subjects tested were young, active and highly selected.

26  
27 241 The questionnaires were anonymous, and participants were identified by an alphanumeric code,  
28  
29 242 double-blind. All data was treated in accordance with the Ethical Principles of Psychologists Code  
30  
31 243 of Conduct (American Psychological Association 2002).  
32  
33

34  
35 244

#### 36 37 245 *Control Variables*

38  
39 246 The control variables used in our study were: age (years), length of employment (years of service);  
40  
41 247 education level (8 or more years of schooling); rank (officer, or supervisor and technical staff);  
42  
43 248 origin (Northern or Southern Italy); housing (in barracks or home); marital status (single or  
44  
45 249 divorced/ married or cohabiting); presence of children (no/yes).  
46  
47

48  
49 250

#### 50 51 251 *Statistical analyses*

52  
53 252 The first question we set out to answer was whether there is a relationship between the individual  
54  
55 253 level of work-related stress and mental health problems. In order to do this we used hierarchical  
56  
57

1  
2  
3 254 multiple linear regression model in which the variable “depression score” was posed as dependent  
4  
5 255 variable. In the first model we used the socio-demographic variables (age, length of employment,  
6  
7 256 rank, education level, origin, marital status, housing, having offspring) as independent variables. In  
8  
9 257 the second and third models, we separately added the stress-related variables from the Karasek  
10  
11 258 (demand, control, support) and the Siegrist models (effort, reward, over-commitment). In the final  
12  
13 259 model, we put together all the stress-related and the socio-demographic variables as predictors of  
14  
15 260 depression. The degree of association between variables is indicated by the regression coefficient  
16  
17 261 computed on the standardized variables ( $\beta$ ). The amount of variance of the depression score  
18  
19 262 accounted for by the predictors is indexed by the ( $R^2$ ).

22 263 The second question involved ascertaining what was the risk of suffering from depression for a  
23  
24 264 policeman in a state of distress. We used binary logistic regression, with the state of depression  
25  
26 265 (“caseness”) as defined above as the dependent variable. Separately, we used job strain (high  
27  
28 266 demand and low control), social isolation (“support” below the median), isostrain (job strain plus  
29  
30 267 social isolation), effort-reward imbalance (subjects with ERI value  $>1$ ), and over-involvement in  
31  
32 268 work (“over-commitment” above the median) as independent variables. The resulting values (“raw”  
33  
34 269 or unadjusted) were subsequently corrected by adding the socio-demographic variables to the  
35  
36 270 equation. We calculated odds ratios (OR) and their 95% confidence intervals (95%CI).

37  
38  
39  
40 271 PASW/SPSS software (version 20, IBM, Chicago, IL) was used for analyses.

41  
42 272 The study protocol was approved by the Ethics Committee of the Catholic University Rome School  
43  
44 273 of Medicine, the Institute of Occupational Medicine, responsible for co-coordinating the study, and  
45  
46 274 the National Police Management Board.

47  
48  
49 275

50  
51 276

## 52 53 277 **Results**

54  
55 278

1  
2  
3 279 The characteristics of the study population are shown in Table 1. The average values of the  
4  
5 280 variables indicating stress in the workplace and those referring to mental disorders are listed in  
6  
7 281 Table 2. In this study, there were 21 (7.3%) likely cases of mild depression (BDI greater than or  
8  
9 282 equal to 10) among the policemen, while the most likely cases of moderate depression (BDI > 16)  
10  
11 283 were found among 7 subjects (2.4%).  
12  
13 284 Linear regression analysis (Table 3) enabled us to evaluate the level of depression that can be  
14  
15 285 predicted on the basis of socio-demographic and work-related stress data. The association between  
16  
17 286 socio-demographic variables and depression was weak and generally not significant, only the rank  
18  
19 287 level was inversely associated with depression. Taken together, the socio-demographic factors  
20  
21 288 described only a small fraction of the variability of psychological problems, i.e. less than 1%.  
22  
23 289 By adding demand, control and support, the percentage of variance expressed rose to about one-  
24  
25 290 tenth of the total variance ( $R^2=0.096$ ). Social support was negatively associated with depression ( $\beta=$   
26  
27 291  $-0.211$ ). Job control was negatively associated with the presence of depressive symptoms ( $\beta=$   
28  
29 292  $0.127$ ).  
30  
31 293 By substituting the DCS model variables with those of the ERI model (Model III of Table 3) among  
32  
33 294 the independent variables, the coefficient of determination improved significantly, thus expressing  
34  
35 295 about one-sixth of the total variance ( $R^2= 0,16$ ). Reward received for work was the most important  
36  
37 296 protective factor against depression ( $\beta = -0.303$ ). On the contrary, excessive involvement in work or  
38  
39 297 intrinsic effort (over-commitment) was significantly associated with depression in a positive way  
40  
41 298 ( $\beta= 0.121$ ).  
42  
43 299 The more complex model, in which all stress-related variables were included (Model IV of Table 3)  
44  
45 300 indicated that there was a negative linear association between the score for depression and rewards  
46  
47 301 ( $\beta= -0.226$ ).  
48  
49 302 By logistic regression (Table 4) we observed that for subjects in a state of "distress" according to  
50  
51 303 the DCS model ( i.e. those with a simultaneous high level of "demand" and low level of "control"),  
52  
53  
54  
55  
56  
57  
58  
59  
60

1  
2  
3 304 the risk of being depressed almost doubled (OR 1.92; 95% CI 0.76-4.84), although the association  
4  
5 305 was not statistically significant since the ranges of variability of the estimates included the  
6  
7 306 assumption of equivalence. If we take into account the lack of social support, which was  
8  
9 307 significantly associated with depression (OR 3.47; 95%CI 1.16-10.38), the condition of iso-strain  
10  
11 308 was associated with a significantly increased risk of depression (OR 7.39; CI95% 2.46-22.23).  
12  
13  
14 309 The police officers who were in a state of "distress" according to the ERI model (i.e. weighted ratio  
15  
16 310 between effort and reward more than 1) also had a much higher risk of depression (OR 7.39 CI95%  
17  
18 311 2.46-22.23). Over-commitment was associated with the risk of depression (OR 3.85; CI95% 1.28-  
19  
20 312 11.54).  
21  
22  
23 313  
24  
25 314

## 27 315 **Discussion**

28  
29 316 Our study, which to the best of our knowledge is the only conducted on a police unit of avant-garde,  
30  
31 317 indicated that higher levels of work stress are associated with depressive symptoms. Both the work-  
32  
33 318 related stress models we used were significantly associated with the presence of depressive  
34  
35 319 symptoms, even if the effort / reward / imbalance model seemed to be more efficient in predicting  
36  
37 320 mental ill-health than the demand / control / support model.  
38  
39

40 321 Seven per cent of policemen in our cohort reported depressive symptoms. The prevalence is lower  
41  
42 322 than that found by by Fox et al.<sup>28)</sup> in urban US policemen (9%), by Frühwald et al.<sup>29)</sup> in Lower  
43  
44 323 Austria (9%), by Arial et al.<sup>30)</sup> in a Swiss sample of police officers (11.9%), by Chen et al.<sup>31)</sup> in the  
45  
46 324 Taiwanese police (21.6%), and by Obidoa et al.<sup>32)</sup> among US corrections officers (31%), and it is  
47  
48 325 comparable with that found in other working populations<sup>12-15)</sup>. A nationwide study in the  
49  
50 326 Norwegian police service, indeed, showed that the younger policemen reported lower levels of  
51  
52 327 depressive symptoms than the corresponding general population<sup>33)</sup>. A recent comparison of police  
53  
54 328 and other employees found no indications that self-reported mental health disturbances are more  
55  
56  
57  
58  
59  
60

1  
2  
3 329 prevalent among police officers than among groups of employees that are not considered high-risk  
4  
5 330 groups <sup>34)</sup>. Our sample was composed by young and highly selected policemen, and this may  
6  
7 331 explain our findings.

8  
9 332 Depression represents a considerable cost for productivity both in terms of absenteeism and  
10  
11 333 presenteeism <sup>35)</sup>. But much more important is the fact that this condition increases the possibility of  
12  
13 334 errors and the risk to the health and safety of others.

14  
15 335 The results of our observations are in agreement with the literature. A recent meta-analysis of  
16  
17 336 studies on the association between stress and mental disorders indicates that psychosocial problems  
18  
19 337 in the workplace, reduced control, job strain, low social support, and the discrepancy between effort  
20  
21 338 and rewards predict the onset of depression <sup>36)</sup>. Another review of 14 longitudinal studies indicates  
22  
23 339 that lack of social support enhances depression <sup>37)</sup>. Even more recent studies go in the same  
24  
25 340 direction. The two effort-reward and demand-control-support models used together have greater  
26  
27 341 predictive power for depressive disorders than a single model <sup>38)</sup>.

28  
29 342 In this study, the ERI model proved particularly useful in interpreting the state of "distress" in  
30  
31 343 policemen. Excessive over-commitment and lack of rewards significantly increased depression  
32  
33 344 scores and the probability of disease. This result confirms the observations of Martins and Lopes <sup>39)</sup>  
34  
35 345 who argue that ERI and over-commitment are associated with the presence of common mental  
36  
37 346 disorders among military personnel in peacetime, and that of Kingdom and Smith <sup>40)</sup> showing that  
38  
39 347 ERI was the most important predictor of depression among police officers in the UK Coast Guard.  
40  
41 348 The DCS model captures some important aspects, such as the lack of full control over the  
42  
43 349 organization of work and the lack of support from colleagues or superiors. The importance of lack  
44  
45 350 of support from superior and organization in the occurrence of depression has already been reported  
46  
47 351 by Berg et al. in the Norwegian police <sup>33)</sup>, and by Arial et al. <sup>30)</sup> in a sample of Swiss police. Overall,  
48  
49 352 both models appear to be useful for diagnosing a situation of suffering which could result in  
50  
51 353 disease.

1  
2  
3 354 The data emerging from our study should be interpreted with caution as subjectivity may have  
4  
5 355 distorted the observations. The cross-sectional nature of the research does not allow us to infer the  
6  
7 356 direction of the observed phenomena. Finally, because our sample corresponds to a specific police  
8  
9 357 unit, and it is a rather small cohort, our results may not be generalizable to police officers in  
10  
11 358 general, with different occupational exposure, nor to special forces in countries with different ethnic  
12  
13 359 or cultural characteristics. However, our study also has several important strengths. To our  
14  
15 360 knowledge, this is the first study to investigate associations linked to depression and work stress in  
16  
17 361 terms of both DCS and ERI. The population had a very consistent exposure to homogenous  
18  
19 362 occupational risks, while many studies include persons who perform very different tasks. The  
20  
21 363 participation rate was very high (99%). Finally, since the measurements used in this study have  
22  
23 364 been validated in several other studies, our results are more comparable with other research  
24  
25 365 findings.

26  
27  
28  
29 366 In this study we found a modest prevalence of depression, lower than that found in other police  
30  
31 367 corps. This does not mean that the problem in this Italian special unit is negligible. Workers with  
32  
33 368 depressive symptoms should obtain timely and confidential assistance. Furthermore, the causes of  
34  
35 369 excessive occupational stress must be promptly identified and removed or minimized.

36  
37  
38 370  
39  
40  
41  
42  
43  
44  
45  
46  
47  
48  
49  
50  
51  
52  
53  
54  
55  
56  
57  
58  
59  
60



1  
2  
3 371 **References**  
4 372  
5  
6 373  
7  
8  
9 374  
10  
11 375  
12  
13 376  
14  
15  
16  
17  
18 378  
19  
20 379  
21  
22 380  
23  
24 381  
25  
26 382  
27  
28 383  
29  
30 384  
31  
32  
33 385  
34  
35 386  
36  
37 387  
38  
39 388  
40  
41 389  
42  
43  
44 390  
45  
46 391  
47  
48 392  
49  
50 393  
51  
52  
53 394  
54  
55 395  
56  
57  
58  
59  
60

1. Komarovskaya I, Maguen S, McCaslin SE, Metzler TJ, Madan A, Brown AD, et al. The impact of killing and injuring others on mental health symptoms among police officers. *J Psychiatr Res.* 2011;45(10):1332-6.
2. Brown J, Fielding J, Grover J. Distinguishing traumatic, vicarious and routine operational stressor exposure and attendant adverse consequences in a sample of police officers. *Work Stress* 1999; 13:312-325
3. Leino TM, Selin R, Summala H, Virtanen M. Violence and psychological distress among police officers and security guards. *Occup Med (London)* 2011; 61 (6): 400-406
4. Berg AM, Hem E, Lau B, Håseth K, Ekeberg O. Stress in the Norwegian police service. *Occup Med (Lond).* 2005; 55(2):113-20.
5. Garbarino S, Magnavita N, Elovainio M, Heponiemi T, Ciprani F, Cuomo G, Bergamaschi A. Police job strain during routine activities and a major event. *Occup Med (Lond).* 2011; 61(6):395-9.
6. Winwood PC, Peters R, Peters M, Dollard M. Further validation of the psychological injury risk indicator scale. *J Occup Environ Med.* 2012;54(4):478-84.
7. Summerfield D. Metropolitan Police blues: protracted sickness absence, ill health retirement, and the occupational psychiatrist. *BMJ.* 2011;342:d2127.
8. Karasek RA. Job demands, job decision latitude, and mental strain. Implication for job redesign. *Adm Sci Q* 1979; 24: 285-308
9. Siegrist J. Adverse health effects of high-effort/low-reward conditions. *J Occup Health Psychol* 1996; 1:27-41
10. Magnavita N, Garbarino S. Social psychiatry in the waiting room. What a physician can learn about occupational stress from workers waiting to be examined. *Psy J*, 2012 (in press)

- 1  
2  
3 396 11. Nieuwenhuijsen K, Bruinvels D, Frings-Dresen M. Psychosocial work environment and  
4  
5 397 stress-related disorders, a systematic review. *Occup Med (Lond)*. 2010; 60(4):277-86.  
6  
7 398 12. Pflanz SE, Ogle AD. Job stress, depression, work performance, and perceptions of  
8  
9 399 supervisors in military personnel. *Mil Med*. 2006;171(9):861-5.  
10  
11 400 13. Iversen AC, van Staden L, Hughes JH, Browne T, Hull L, Hall J et al. The prevalence of  
12  
13 401 common mental disorders and PTSD in the UK military: using data from a clinical  
14  
15 402 interview-based study. *BMC Psychiatry*. 2009;9:68.  
16  
17 403 14. Alonso J, Angermeyer MC, Bernert S, Bruffaerts R, Brugha TS, Bryson H, et al. Prevalence  
18  
19 404 of mental disorders in Europe: results from the European Study of the Epidemiology of  
20  
21 405 Mental Disorders (ESEMeD) project. *Acta Psychiatr Scand Suppl*. 2004; (420):21-7.  
22  
23 406 15. Huang SL, Lee HS, Li RH, Lai YM, Chen AL, Tang FC. Differences in Health Complaints  
24  
25 407 among Taiwanese Workers in Different Occupational Categories. *J Occup Health* 2012;  
26  
27 408 54(3):241-9.  
28  
29 409 16. Yoo H, Franke WD. Stress and cardiovascular disease risk in female law enforcement  
30  
31 410 officers. *Int Arch Occup Environ Health*. 2011; 84(3):279-86.  
32  
33 411 17. von dem Knesebeck O, David K, Siegrist J. Psychosocial stress at work and musculoskeletal  
34  
35 412 pain among police officers in special forces. *Gesundheitswesen*. 2005; 67(8-9):674-9.  
36  
37 413 18. Bourbonnais R, Jauvin N, Dussault J, Vézina M. Psychosocial work environment,  
38  
39 414 interpersonal violence at work and mental health among correctional officers. *Int J Law*  
40  
41 415 *Psychiatry*. 2007; 30(4-5):355-68.  
42  
43 416 19. Janzen BL, Muhajarine N, Zhu T, Kelly IW. Effort-reward imbalance, overcommitment, and  
44  
45 417 psychological distress in Canadian police officers. *Psychol Rep*. 2007; 100(2):525-30.  
46  
47 418 20. Taris TW, Kompier MAJ, Geurts SAE, Houtman ILD, van den Heuvel FFM. Professional  
48  
49 419 efficacy, exhaustion, and work characteristics among police officers: A longitudinal test of  
50  
51  
52  
53  
54  
55  
56  
57  
58  
59  
60

- 1  
2  
3 420 the learning-related predictions of the demand-control model. *J Occup Organizat Psychol*  
4  
5 421 2010; 83: 455-474  
6  
7 422 21. Hall GB, Dollard MF, Tuckey MR, Winefield AH, Thompson BM. Job demands, work-  
8  
9 423 family conflicts, and emotional exhaustion in police officers: a longitudinal test of  
10  
11 424 competing theories. *J Occup Organizat Psychol* 2010; 83: 237-250.  
12  
13 425 22. Wang Z, Inslicht SS, Metzler TJ, Henn-Haase C, McCaslin SE, Tong H, et al. A prospective  
14  
15 426 study of predictors of depression symptoms in police. *Psychiatry Res.* 2010;175(3):211-6.  
16  
17 427 23. Magnavita N. Two tools for health surveillance of job stress: the Karasek Job Content  
18  
19 428 Questionnaire and the Siegrist Effort Reward Imbalance Questionnaire. *G Ital Med Lav*  
20  
21 429 *Ergon* 2007; 29 (3): 667-670  
22  
23 430 24. Beck AT, Rush AJ, Shaw BF, Emery G. Cognitive therapy of depression. Guilford Press,  
24  
25 431 New York 1979  
26  
27 432 25. Bunevicius A, Staniute M, Brozaitiene J, Pommer AM, Pop VJ, Montgomery SA,  
28  
29 433 Bunevicius R. Evaluation of depressive symptoms in patients with coronary artery disease  
30  
31 434 using the Montgomery Åsberg Depression Rating Scale. *Int Clin Psychopharmacol.*  
32  
33 435 2012;27(5):249-55  
34  
35 436 26. Preljevic VT, Osthus TB, Sandvik L, Opjordsmoen S, Nordhus IH, Os I, Dammen T.  
36  
37 437 Screening for anxiety and depression in dialysis patients: Comparison of the Hospital  
38  
39 438 Anxiety and Depression Scale and the Beck Depression Inventory. *J Psychosom Res.*  
40  
41 439 2012;73(2):139-44.  
42  
43 440 27. Adachi Y, Aleksic B, Nobata R, Suzuki T, Yoshida K, Ono Y, Ozaki N. Combination use of  
44  
45 441 Beck Depression Inventory and two-question case-finding instrument as a screening tool for  
46  
47 442 depression in the workplace. *BMJ Open.* 2012;2(3). pii: e000596.  
48  
49  
50  
51  
52  
53  
54  
55  
56  
57  
58  
59  
60

- 1  
2  
3 443 28. Fox J, Desai MM, Britten K, Lucas G, Luneau R, Rosenthal MS. Mental-health conditions,  
4  
5 444 barriers to care, and productivity loss among officers in an urban police department. *Conn*  
6  
7 445 *Med.* 2012;76(9):525-31.  
8  
9  
10 446 29. Frühwald S, Entenfellner A, Grill W, Korbel C, Frottier P. Raising awareness about  
11  
12 447 depression together with service users and relatives - results of workshops for police officers  
13  
14 448 in Lower Austria. *Neuropsychiatr.* 2011;25(4):183-91.  
15  
16 449 30. Arial M, Gonik V, Wild P, Danuser B. Association of work related chronic stressors and  
17  
18 450 psychiatric symptoms in a Swiss sample of police officers; a cross sectional questionnaire  
19  
20 451 study. *Int Arch Occup Environ Health* 2010; 83: 323-331.  
21  
22  
23 452 31. Chen HC, Chou FH, Chen MC, Su SF, Wang SY, Feng WW, et al. A survey of quality of  
24  
25 453 life and depression for police officers in Kaohsiung, Taiwan. *Qual Life Res.*  
26  
27 454 2006;15(5):925-32.  
28  
29 455 32. Obidoa C, Reeves D, Warren N, Reisine S, Cherniack M. Depression and work family  
30  
31 456 conflict among corrections officers. *J Occup Environ Med.* 2011;53(11):1294-301.  
32  
33  
34 457 33. Berg AM, Hem E, Lau B, Ekeberg Ø. An exploration of job stress and health in the  
35  
36 458 Norwegian police service: a cross sectional study. *J Occup Med Toxicol.* 2006 ;1:26.  
37  
38 459 34. van der Velden PG, Rademaker AR, Vermetten E, Portengen MA, Yzermans JC, Grievink  
39  
40 460 L. Police officers: a high-risk group for the development of mental health disturbances? A  
41  
42 461 cohort study. *BMJ Open.* 2013 Jan 24;3(1). doi:pii: e001720. 10.1136/bmjopen-2012-  
43  
44 462 001720  
45  
46  
47 463 35. Lee YM . Loss of productivity due to depression among Korean employees *J Occup Health*  
48  
49 464 2010; 52: 389-394.  
50  
51  
52 465 36. Stansfeld S, Candy B. Psychosocial work environment and mental health--a meta-analytic  
53  
54 466 review. *Scand J Work Environ Health.* 2006; 32(6):443-62.  
55  
56  
57  
58  
59  
60

- 1  
2  
3 467 37. Netterstrøm B, Conrad N, Bech P, Fink P, Olsen O, Rugulies R, Stansfeld S. The relation  
4  
5 468 between work-related psychosocial factors and the development of depression. *Epidemiol*  
6  
7 469 *Rev.* 2008; 30:118-32.
- 8  
9 470 38. Chen SW, Wang PC, Hsin PL, Oates A, Sun IW, Liu SI. Job stress models, depressive  
10  
11 471 disorders and work performance of engineers in microelectronics industry. *Int Arch Occup*  
12  
13 472 *Environ Health* 2011; 84(1):91-103.
- 14  
15 473 39. Martins LCX, Lopes CS. Military hierarchy, job stress and mental health in peacetime. *Occ*  
16  
17 474 *Med (Oxford)* 2012; 62: 182-187
- 18  
19 475 40. Kingdom SE, Smith AP. Combined effects of work-related stress in Her Majesty's  
20  
21 476 *Coastguard (HMCG)*. *Int Marit Health.* 2012;63(1):63-70.
- 22  
23  
24  
25  
26  
27  
28  
29  
30  
31  
32  
33  
34  
35  
36  
37  
38  
39  
40  
41  
42  
43  
44  
45  
46  
47  
48  
49  
50  
51  
52  
53  
54  
55  
56  
57  
58  
59  
60

1 Table 1.  
 2 Characteristics of the observed population (N=289). Mean and standard deviation of stress and  
 3 mental health variables.  
 4

| SOCIO-DEMOGRAPHIC VARIABLES                     |                   |
|-------------------------------------------------|-------------------|
| Age, years (mean, $\pm$ s.d.)                   | 35.4 ( $\pm$ 7.5) |
| Length of service, years (mean, $\pm$ s.d.)     | 14.0 ( $\pm$ 7.9) |
| Rank, superintendent or technical staff, N (%)  | 140 (48.4)        |
| Education level, high school or degree, N (%)   | 217 (75.1)        |
| Origin, Northern Italy, N (%)                   | 145 (50.2)        |
| Living in barracks, N (%)                       | 162 (56.1)        |
| Married or cohabiting, N (%)                    | 108 (37.4)        |
| Presence of offspring, N (%)                    | 106 (36.7)        |
| STRESS VARIABLES                                |                   |
| Demand (mean, $\pm$ s.d.) (range 5-20)          | 13.4 $\pm$ 2.02   |
| Control (mean, $\pm$ s.d.) (range 6-24)         | 13.3 $\pm$ 2.7    |
| Support (mean, $\pm$ s.d.) (range 6-24)         | 18.6 $\pm$ 2.9    |
| Job Strain (D/C ratio) (mean, $\pm$ s.d.)       | 1.31 $\pm$ 0.41   |
| Effort (mean, $\pm$ s.d.) (range 6-30)          | 15.0 $\pm$ 3.2    |
| Reward (mean, $\pm$ s.d.) (range 11-55)         | 42.3 $\pm$ 6.2    |
| Over-commitment (mean, $\pm$ s.d.) (range 6-24) | 6.9 $\pm$ 1.9     |
| ERI (mean, $\pm$ s.d.)                          | 0.70 $\pm$ 0.28   |
| MENTAL HEALTH VARIABLES                         |                   |
| Depression (range 0-63)                         | 3.3 $\pm$ 4.2     |

8 Table 2. Standardized correlation coefficients (beta) for socio-demographic variables, stress  
 9 measurements and depression score. Hierarchical linear regression; adjusted coefficient of  
 10 determination ( $R^2$ ) of each equation.  
 11 \*= $p < 0,05$ ; \*\*= $p < 0,01$ ; \*\*\*= $p < 0,001$   
 12

|                      | <b>Depression</b> |          |          |         |
|----------------------|-------------------|----------|----------|---------|
| Age                  | .020              | .048     | .150     | .132    |
| Length of employment | .239              | .270     | .179     | .212    |
| Rank                 | -.186             | -.204*   | -.136    | -.148   |
| Education            | .028              | .020     | -.001    | .000    |
| Origin               | -.070             | -.091    | -.052    | -.063   |
| Marital status       | -.009             | .026     | .004     | .011    |
| Housing              | -.124             | -.108    | -.105    | -.099   |
| Offspring            | -.038             | -.055    | -.062    | -.061   |
| Demand               |                   | .102     |          | -.016   |
| Control              |                   | -.127*   |          | -.068   |
| Support              |                   | -.211*** |          | -.095   |
| Effort               |                   |          | .062     | .086    |
| Reward               |                   |          | -.303*** | -.226** |
| Over-commitment      |                   |          | .121*    | .114    |
| $R^2$                | 0.009             | 0.096    | 0.159    | 0.161   |

1  
2  
3  
4 15 Table 3. Relative risk (Odds ratios ,ORs , and 95% confidence intervals, CI 95%) of manifesting depression in  
5 16 association with state of distress (job strain, effort-reward imbalance, social isolation, elevated over-  
6 17 commitment). Logistic regression. Adjusted raw values for socio-demographic variables (age, length of  
7 18 employment, rank, education level, origin, marital status, housing, having offspring).  
8  
9  
10  
11  
12  
13  
14

15  
16  
17  
18  
19  
20  
21  
22  
23  
24  
25  
26  
27  
28  
29  
30  
31

| Distress type                                            | Depressive complaints |                      |
|----------------------------------------------------------|-----------------------|----------------------|
|                                                          | Crude OR (95%CI)      | Adjusted OR (95%CI)  |
| Job strain (high demand, low control)                    | 1.92 (0.76-4.84)      | 2.67 (0.93-7.69)     |
| Social isolation (Low support)                           | 3.01 (1.07-8.46)*     | 3.47 (1.16-10.38)*   |
| Isostrain                                                | 2.62 (1.00-6.86)*     | 3.72 (1.26-10.95)*   |
| Excessive discrepancy between effort and reward (ERI >1) | 6.26 (2.36-16.59)***  | 7.39 (2.46-22.23)*** |
| Excessive work commitment (High Over-commitment)         | 3.06 (1.11-8.46)*     | 3.85 (1.28-11.54)*   |

32  
33 22  
34 23 \*=p<0,05; \*\*=p<0,01; \*\*\*=p<0,001  
35  
36  
37  
38  
39  
40  
41  
42  
43  
44  
45  
46  
47  
48  
49  
50  
51  
52  
53  
54  
55  
56  
57  
58  
59  
60



STROBE 2007 (v4) Statement—Checklist of items that should be included in reports of *cross-sectional studies*

| Section/Topic                | Item # | Recommendation                                                                                                                                                                       | Reported on page # |
|------------------------------|--------|--------------------------------------------------------------------------------------------------------------------------------------------------------------------------------------|--------------------|
| Title and abstract           | 1      | (a) Indicate the study's design with a commonly used term in the title or the abstract                                                                                               | 1                  |
|                              |        | (b) Provide in the abstract an informative and balanced summary of what was done and what was found                                                                                  | 2                  |
| <b>Introduction</b>          |        |                                                                                                                                                                                      |                    |
| Background/rationale         | 2      | Explain the scientific background and rationale for the investigation being reported                                                                                                 | 4-7                |
| Objectives                   | 3      | State specific objectives, including any prespecified hypotheses                                                                                                                     | 8                  |
| <b>Methods</b>               |        |                                                                                                                                                                                      |                    |
| Study design                 | 4      | Present key elements of study design early in the paper                                                                                                                              | 8                  |
| Setting                      | 5      | Describe the setting, locations, and relevant dates, including periods of recruitment, exposure, follow-up, and data collection                                                      | 8-10               |
| Participants                 | 6      | (a) Give the eligibility criteria, and the sources and methods of selection of participants                                                                                          | 8-10               |
| Variables                    | 7      | Clearly define all outcomes, exposures, predictors, potential confounders, and effect modifiers. Give diagnostic criteria, if applicable                                             | 9-10               |
| Data sources/<br>measurement | 8*     | For each variable of interest, give sources of data and details of methods of assessment (measurement). Describe comparability of assessment methods if there is more than one group | 8-10               |
| Bias                         | 9      | Describe any efforts to address potential sources of bias                                                                                                                            | 10                 |
| Study size                   | 10     | Explain how the study size was arrived at                                                                                                                                            | 8                  |
| Quantitative variables       | 11     | Explain how quantitative variables were handled in the analyses. If applicable, describe which groupings were chosen and why                                                         | 10-11              |
| Statistical methods          | 12     | (a) Describe all statistical methods, including those used to control for confounding                                                                                                | 10-11              |
|                              |        | (b) Describe any methods used to examine subgroups and interactions                                                                                                                  | 11                 |
|                              |        | (c) Explain how missing data were addressed                                                                                                                                          | 8; 10-11           |
|                              |        | (d) If applicable, describe analytical methods taking account of sampling strategy                                                                                                   | 11                 |
|                              |        | (e) Describe any sensitivity analyses                                                                                                                                                | 11                 |
| <b>Results</b>               |        |                                                                                                                                                                                      |                    |

|                          |     |                                                                                                                                                                                                              |         |
|--------------------------|-----|--------------------------------------------------------------------------------------------------------------------------------------------------------------------------------------------------------------|---------|
| Participants             | 13* | (a) Report numbers of individuals at each stage of study—eg numbers potentially eligible, examined for eligibility, confirmed eligible, included in the study, completing follow-up, and analysed            | Tab 1   |
|                          |     | (b) Give reasons for non-participation at each stage                                                                                                                                                         | 8       |
|                          |     | (c) Consider use of a flow diagram                                                                                                                                                                           | n/a     |
| Descriptive data         | 14* | (a) Give characteristics of study participants (eg demographic, clinical, social) and information on exposures and potential confounders                                                                     | Tab 1   |
|                          |     | (b) Indicate number of participants with missing data for each variable of interest                                                                                                                          | n/a     |
| Outcome data             | 15* | Report numbers of outcome events or summary measures                                                                                                                                                         | 12-13   |
| Main results             | 16  | (a) Give unadjusted estimates and, if applicable, confounder-adjusted estimates and their precision (eg, 95% confidence interval). Make clear which confounders were adjusted for and why they were included | Tab 2-3 |
|                          |     | (b) Report category boundaries when continuous variables were categorized                                                                                                                                    | 12-13   |
|                          |     | (c) If relevant, consider translating estimates of relative risk into absolute risk for a meaningful time period                                                                                             | n/a     |
| Other analyses           | 17  | Report other analyses done—eg analyses of subgroups and interactions, and sensitivity analyses                                                                                                               | n/a     |
| <b>Discussion</b>        |     |                                                                                                                                                                                                              |         |
| Key results              | 18  | Summarise key results with reference to study objectives                                                                                                                                                     | 2       |
| Limitations              | 19  | Discuss limitations of the study, taking into account sources of potential bias or imprecision. Discuss both direction and magnitude of any potential bias                                                   | 13-15   |
| Interpretation           | 20  | Give a cautious overall interpretation of results considering objectives, limitations, multiplicity of analyses, results from similar studies, and other relevant evidence                                   | 14      |
| Generalisability         | 21  | Discuss the generalisability (external validity) of the study results                                                                                                                                        | 14-15   |
| <b>Other information</b> |     |                                                                                                                                                                                                              |         |
| Funding                  | 22  | Give the source of funding and the role of the funders for the present study and, if applicable, for the original study on which the present article is based                                                | 1       |

\*Give information separately for cases and controls in case-control studies and, if applicable, for exposed and unexposed groups in cohort and cross-sectional studies.

**Note:** An Explanation and Elaboration article discusses each checklist item and gives methodological background and published examples of transparent reporting. The STROBE checklist is best used in conjunction with this article (freely available on the Web sites of PLoS Medicine at <http://www.plosmedicine.org/>, Annals of Internal Medicine at <http://www.annals.org/>, and Epidemiology at <http://www.epidem.com/>). Information on the STROBE Initiative is available at [www.strobe-statement.org](http://www.strobe-statement.org).

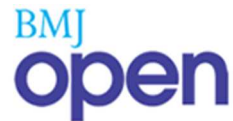

**Association of work-related stress with depression symptoms in a special police force. A cross-sectional study.**

|                                 |                                                                                                                                                                                                                                                                                                                                                            |
|---------------------------------|------------------------------------------------------------------------------------------------------------------------------------------------------------------------------------------------------------------------------------------------------------------------------------------------------------------------------------------------------------|
| Journal:                        | <i>BMJ Open</i>                                                                                                                                                                                                                                                                                                                                            |
| Manuscript ID:                  | bmjopen-2013-002791.R1                                                                                                                                                                                                                                                                                                                                     |
| Article Type:                   | Research                                                                                                                                                                                                                                                                                                                                                   |
| Date Submitted by the Author:   | 20-May-2013                                                                                                                                                                                                                                                                                                                                                |
| Complete List of Authors:       | Garbarino, Sergio; University of Genoa, Department of Neuroscience, Ophthalmology and Genetics<br>Cuomo, Giovanni; Ministry of the Interior, State Police Health Service Department<br>Chiorri, Carlo; University of Genoa, Department of Educational Sciences, Psychology Unit,<br>Magnavita, Nicola; Università Cattolica del Sacro Cuore, Public Health |
| <b>Primary Subject Heading</b>: | Occupational and environmental medicine                                                                                                                                                                                                                                                                                                                    |
| Secondary Subject Heading:      | Medical management, Public health, Mental health                                                                                                                                                                                                                                                                                                           |
| Keywords:                       | OCCUPATIONAL & INDUSTRIAL MEDICINE, Depression & mood disorders < PSYCHIATRY, PUBLIC HEALTH                                                                                                                                                                                                                                                                |
|                                 |                                                                                                                                                                                                                                                                                                                                                            |

SCHOLARONE™  
Manuscripts

1  
2  
3 1 **Association of work-related stress with depression symptoms in a special police force. A cross-**  
4  
5 2 **sectional study.**

6  
7 3  
8  
9 4  
10  
11 5 **Sergio Garbarino <sup>1,2</sup>, Giovanni Cuomo <sup>2</sup>, Carlo Chiorri <sup>3</sup>, Nicola Magnavita <sup>4</sup>.**

12 6  
13  
14  
15  
16 7 1. State Police Health Service Department, Ministry of the Interior, Rome, Italy

17 8 2. Department of Neuroscience, Ophthalmology and Genetics, University of Genoa, Genoa, Italy

18 9 3. Department of Educational Sciences, Psychology Unit, University of Genoa, Genoa, Italy

19 10 4. Department of Public Health, Occupational Health Unit, Università Cattolica del Sacro Cuore, Largo Gemelli 8, 00168 Roma,  
20  
21 Italy. e-mail: [nicolamagnavita@gmail.com](mailto:nicolamagnavita@gmail.com)

22 11  
23  
24 12  
25  
26 13 *Correspondence to:* N. Magnavita. Tel. +39-347-3300367, Fax: +39-06-61909399, e-mail [nicolamagnavita@gmail.com](mailto:nicolamagnavita@gmail.com);  
27 14 [nmagnavita@rm.unicatt.it](mailto:nmagnavita@rm.unicatt.it)

28  
29 15  
30  
31 16  
32  
33 17  
34  
35 18 **Type of contribution: Original**

36  
37 19  
38  
39 20 **Running title: Stress and depression in police**

40  
41 21  
42  
43  
44 22 Word count: 4475 words

45  
46 23  
47  
48 24 Abstract, word count:

49  
50 25  
51  
52  
53 26 Tables: 3

54  
55 27  
56  
57  
58  
59  
60

1  
2  
3 28 Figures: 0  
4  
5  
6

7  
8  
9  
10 29

11  
12  
13  
14 30 Funding: This research received no specific grant from any funding agency in the public,  
15 31 commercial or not-for-profit sectors.  
16

17  
18  
19 32

20 33 Competing interest: none declared. A complete declaration on competing interest will be signed by  
21 34 all authors before the publication of the paper.  
22  
23  
24  
25  
26  
27  
28 35

29 36 Author's contribution: SG carried out medical examinations on workers, CC administered the  
30 37 psychological tests and revised statistics, NM carried out the statistical analyses and drafted the  
31 38 work, GC revised the work.  
32  
33  
34  
35  
36  
37  
38  
39 39

40 40 Data sharing statement: Technical appendix, statistical code, and dataset available from the  
41 41 corresponding author at Dryad repository, who will provide a permanent, citable and open access  
42 42 home for the dataset.  
43  
44  
45  
46  
47  
48  
49  
50  
51  
52  
53  
54  
55  
56  
57  
58  
59  
60

1  
2  
3 44 **Abstract (max. 300 words)**  
4

5 45 **Objectives.** Law and order enforcement may expose police officers to significant psychosocial risk  
6  
7 46 factors, so that some of them may find themselves in conditions of distress. The aim of this work is  
8  
9 47 to investigate the relationship between job stress and the presence of symptoms of depression and  
10  
11 48 other psychological problems in police officers.

12  
13 49 **Method:** 292 out of 294 components of the Genoa 'Mobile', a special police force engaged  
14  
15 50 exclusively in the enforcement of law and order, responded to our invitation to complete a  
16  
17 51 questionnaire for the assessment of work-related stress, using the demand-control-support (DCS)  
18  
19 52 and the effort-reward-imbalance (ERI) models, and for a screening of mental disorders, including  
20  
21 53 depression (Beck Depression Inventory, BDI), anxiety (State-Trait Anxiety Inventory-Trait, STAI-  
22  
23 54 T), and burnout (Maslach Burnout Inventory, MBI).

24  
25 55 **Results:** Psychological screening showed no case of possible anxiety or burnout, and 21 (7.3%)  
26  
27 56 likely cases of mild depression (BDI  $\geq 10$ ). Lower reward significantly predicted higher depressive  
28  
29 57 symptomatology, and officers that experienced a discrepancy between work effort and rewards  
30  
31 58 showed a marked increase in the risk of self-reported depression (OR 7.00 95% CI 4.76 to 10.30)  
32  
33 59 when compared with their counterparts who did not perceived themselves in a condition of distress.

34  
35 60 **Conclusions:** The prevalence of depressive symptoms in the observed population of police officers  
36  
37 61 was low, but not negligible. Given the delicate tasks that special police officers have to accomplish  
38  
39 62 and that an impaired psychological functioning can increase the possibility of errors and the risk to  
40  
41 63 the health and safety of others, the results of this study suggest to take steps to prevent distress and  
42  
43 64 improve the mental well-being of the police.

44  
45 65 **Keywords:** effort-reward imbalance, depression, distress, job strain, mental health, over-  
46  
47 66 commitment, police, social support, work-related stress.

48  
49 67 **Article summary**

50  
51 68 *'Article focus'*  
52  
53  
54  
55  
56  
57  
58  
59  
60

1  
2  
3 69 (up to three bullet points on the research questions or hypotheses addressed)  
4

5 70 Mental health in the special police forces is a critical issue. Police officers are exposed to acute and  
6  
7 71 chronic stress and may become depressed. The impairment of officers' psychological functioning  
8  
9 72 can be a serious threat to the safety of the public.  
10

11  
12 73

13  
14 74 *'Key messages'*  
15

16 75 (up to three bullet points showing the key messages or significance of the study)  
17

18 76 The prevalence of depression in the police special forces is lower than that of the general population  
19  
20 77 and other groups of police officers. Although prevalence rates were low, a positive association  
21  
22 78 between distress (or job stress) and depressive symptoms was found.. The prevention of distress and  
23  
24 79 the treatment of depressive disorders among police officers are necessary for the safety of the  
25  
26 80 workers and the public.  
27

28  
29 81  
30

31  
32 82 *'Strengths and limitations of this study'*  
33

34 83 This is the first study to investigate the association of "job distress" with depressive  
35  
36 84 symptomatology in a special force police unit and had a higher participation rate. It is a cross-  
37  
38 85 sectional study, conducted on a relatively small cohort and with only self-report measures. .  
39

40  
41 86  
42  
43  
44  
45  
46  
47  
48  
49  
50  
51  
52  
53  
54  
55  
56  
57  
58  
59  
60

## 87 Introduction

88 It is generally agreed that mental health disorders have a multifactorial etiology and in the last  
89 decades research has focused on the role of working conditions in determining people's mental  
90 health [Cherry et al. 2006, Melchior et al. 2007], also because the workers themselves often report  
91 that their work affect their health (X) Direct financial costs due to absenteeism, presenteeism,  
92 reduced productivity and compensation are being added to the intangible costs arising from the  
93 suffering of workers. Alongside the ethical reasons for action, there are also important economic  
94 considerations that indicate the need for preventing mental health conditions. Skilled workers with  
95 qualifications acquired through expensive training and long experience are the most important asset  
96 of any company, i.e., their human capital. The premature loss of these workers due to psychological  
97 problems or illness is an economic as well as a human drama.

98 In the modern society work is not just a way to earn money, but also a crucial element of the  
99 social status of an individual and a source of meaning in her/his life. This often leads to a very high  
100 level of commitment and identification with one's work and organization, and this is especially true  
101 for high level professionals, such as police officers operating in special force units employed in law  
102 enforcement and riot control. It is generally thought that this category of workers is particularly at  
103 risk for the exposure to violent traumas, and hence to posttraumatic stress disorder, since they are  
104 frequently exposed to violent events, but in fact traumatic accidents of this type rarely occur,  
105 whereas it tends to be overlooked the long term effect of such exposure, that, even if not  
106 immediately perceived as detrimental, can still induce maladaptive reactions<sup>3)</sup>. Although it has  
107 been shown that police officers are more resilient to stress than civilians [Yuan et al. 2011, Evans et  
108 al 2013, Galatzer-Levy et al. 2013, Garbarino et al. 2012], several cross-sectional studies have  
109 provided evidence that adverse work conditions are related to poor mental health outcomes (e.g.,  
110 XX) In addition to these operational work-related challenges, police officers may be exposed to  
111 organizational problems that are common within hierarchical, male-dominated paramilitary



1  
2  
3 112 structures such as fire-fighting, ambulance and paramedic services <sup>4)</sup>, Violanti 2011. Daily organizational  
4  
5 113 stressors may be more challenging than operational experiences, as shown by a recent study that  
6  
7 114 reported that levels of perceived stress in a group of police officers, somewhat ironically, were,  
8  
9 115 higher during routine jobs than during a high-risk public event <sup>5)</sup>.

11 116 Both a dramatic violent event and a repeated and prolonged series of administrative events  
12  
13 117 can cause an allostatic load, i.e., a neurobiological maladaptive reaction due to the adaptation to  
14  
15 118 challenging environments characterized by behavioral and emotional changes known as "distress"  
16  
17 119 (Mc Ewen). Through the interaction with many different individual factors, distress can induce the  
18  
19 120 occurrence of mental disorders such as anxiety, depression, burnout, conversion disorder and other  
20  
21 121 conditions classified in DSM IV (Cooper). Psychological dysfunctioning resulting from job distress  
22  
23 122 can be a gradual and progressive process that impairs well-being over time. This gradual evolution  
24  
25 123 often leaves the worker unaware of the problem, or unwilling to acknowledge its importance, at  
26  
27 124 least until the severity of the symptoms makes it clear to colleagues, family, or both. The  
28  
29 125 recognition of emotional problems due to work-related distress in the in the law enforcement  
30  
31 126 context is rarely, if ever, encouraged, since it is considered a sign of weakness <sup>6)</sup>. Consequently,  
32  
33 127 officers fail to seek professional help early enough to prevent diagnosis and gain a fast benefit from  
34  
35 128 treatment.. It is for this reason that mental disorders are the leading cause of retirement in the police  
36  
37 129 force <sup>7)</sup>

38  
39 130 The two leading models that have been used to describe and explain individual perception of  
40  
41 131 stress factors are the Demand/Control/Support (DCS) model, developed by Karasek <sup>8)</sup>, and the  
42  
43 132 Effort/Reward Imbalance (ERI) model, developed by Siegrist <sup>9)</sup>. The DCS model assumes that the  
44  
45 133 primary sources of job stress, or "job strain", stem from two basic characteristics of the job itself:  
46  
47 134 "job demand" and "job control". The model predicts that job strain is not simply a function of job  
48  
49 135 demand, but also depends on the amount of control the worker has over the work. Job demand takes  
50  
51 136 into consideration the pace and intensity of work: work overload, degree of difficulty, available  
52  
53  
54  
55  
56  
57  
58  
59  
60

1  
2  
3 137 time, time allotted to executing tasks and the existence of contradictory or conflicting orders. Job  
4  
5 138 decision latitude, or job control, refers to the worker's ability to control his own activities and skill  
6  
7 139 usage. Social support at work, a moderating factor of job strain, was subsequently included in the  
8  
9 140 model. According to this model, high psychological demands in combination with low decision  
10  
11 141 latitude can contribute to the development of psychological problems, and the workers with high  
12  
13 142 job strain and low social support at work are supposed to be the most vulnerable to negative health  
14  
15 143 effects (the so-called "isolated strain", or "isostrain", hypothesis).

16  
17  
18 144 The ERI model puts emphasis more on the reward rather than on the control structure of  
19  
20 145 work, suggesting that mental distress and its health correlates arise when a high degree of effort is  
21  
22 146 not adequately rewarded in the form of pay, esteem, status consistency or career opportunities. A  
23  
24 147 further assumption of this model involves individual differences in the perception of effort-reward  
25  
26 148 imbalance: people with a motivational pattern of excessive work-related commitment and high need  
27  
28 149 for approval (over-commitment) are at increased risk of strain, and, consequently, health problems  
29  
30 150 <sup>9)</sup>. The Karasek model (DCS), developed in the 1960s, appears to be more suitable for the physical  
31  
32 151 aspects of occupational stress, while Siegrist's model (ERI), designed for the tertiary society of the  
33  
34 152 1980s, is more sensitive to stress arising from work relations and organizational factors <sup>10)</sup>.

35  
36  
37 153 Unfortunately, in literature there is no unique definition of "distress", although there is some  
38  
39 154 consensus in considering it as an unfavorable and unpleasant response to stress. Due to such a  
40  
41 155 vague definition, the prevalence of workers with distress in published studies can range from 5% to  
42  
43 156 50% <sup>11, Marchand, van Rhenen</sup>. When distress reaches clinical relevance it is defined as "stress-related  
44  
45 157 disorder". This term includes a variety of clinical conditions, which are collectively labeled as  
46  
47 158 "common mental disorders" (CMD) [Van der Klink & Van Dijk, 2003]. A systematic review of  
48  
49 159 evidence on psychosocial factors at work and depression, however, showed a high degree of study  
50  
51 160 heterogeneity (Bonde 2006), although other studies found moderate evidence for a relation between  
52  
53 161 the psychological demands of the job and the development of depression, with relative risks of  
54  
55  
56  
57  
58  
59  
60

1  
2  
3 162 approximately 2.0 (XX). The prevalence of CMDs in the US armed forces is 27%<sup>12)</sup> and there is a  
4  
5 163 similar prevalence in the UK armed forces<sup>13, Jones)</sup>. Distress and mental health problems caused by  
6  
7 164 work can affect performance of professional activity, especially in a delicate area such as law  
8  
9 165 enforcement, in which workers have weapons. The mental health-related consequences of stress in  
10  
11 166 police officers can thus be particularly serious not only for the increased risk of their individual  
12  
13 167 health problems, and but also for the increased risk of impaired work performance that could  
14  
15 168 jeopardize the safety and health of the general population. One of the most common diagnoses is  
16  
17 169 depression<sup>Iversen et al. 2009)</sup>, and as reported by Violanti (X), depression can be a contributing factor  
18  
19 170 not only in early retirement, but also in police officer's suicides, murder-suicides, domestic  
20  
21 171 violence, unnecessary violence and aggression while in service, over and above the role played by  
22  
23 172 the police culture that might encourage aggressive and authoritarian attitudes.  
24  
25  
26  
27  
28

29 174 The aim of this study was to investigate, apparently for the first time, the association of a  
30  
31 175 condition of "distress" and the presence of self-reported symptoms of depression, alongside with  
32  
33 176 other common work-related mental problems such as anxiety and burnout takes as a control, in a  
34  
35 177 specialist or 'elite' unit of the Italian police, the 'VI Reparto Mobile' of Genoa, a carefully selected  
36  
37 178 group who is called to maintain law and order in all the major events that take place in the country.  
38  
39 179 The police officers in this group work exclusively as First Responders; are carefully selected among  
40  
41 180 ordinary officers and receive specific psychophysical and tactical training. Their routine work  
42  
43 181 involves ensuring order during sporting events, crowds and parades, natural and social emergencies,  
44  
45 182 and also they are often involved in public events in which there is a high risk of terrorist attacks and  
46  
47 183 physical fights. During a single riot, they are on duty for an average of 10 or more hours of work,  
48  
49 184 have physical fights for over an hour on average and often feel that they are in imminent danger of  
50  
51 185 death. They have a special and continuing education which aims to improve team spirit ("esprit de  
52  
53 186 corp") and increase the preparation to dramatic events. The decision to hold the 2009 G8 meeting in  
54  
55  
56  
57  
58  
59  
60

1  
2  
3 187 Italy provided the opportunity for carrying out our present study. The police officers selected to  
4  
5 188 ensure law and order during this event were asked to undergo a thorough examination of their  
6  
7 189 mental health condition so that their conduct during the meeting could not be stigmatized.  
8

9  
10 **Method**

11  
12 *Participants*

13  
14 192 This study refers to the initial phase of a study started on the eve of the G8 meeting in 2009. The  
15  
16 193 Italian special police force unit 'VI Reparto Mobile' of Genoa is composed of 294 members. Two  
17  
18 194 officers refused to take part in the study and one was unable to complete all the tests in the battery  
19  
20 195 described in the next section and was therefore excluded. The participation rate was 99%. Since  
21  
22 196 only two officers were female, gender differences could not be assessed and they were therefore  
23  
24 197 excluded from the analyses. Hence, the final group of participants comprised 289 officers (see  
25  
26 198 Table 1 for descriptive statistics of the socio-demographic variables).  
27

---

28  
29  
30 Insert Table 1 about here  
31

---

32 200 Occupational stress was measured on three separate occasions: (i) in January 2009, when officers  
33  
34 201 were engaged only in routine work; (ii) in April 2009, when they underwent specific training in  
35  
36 202 preparation for the meeting, and (iii) in July 2009, shortly before the Genoa G8 summit meeting  
37  
38 203 took place. Following the procedure already adopted in previous work [lavori su assenze,  
39  
40 204 personalità], we averaged the three measurements into a single value, so as to have the level of  
41  
42 205 stress that each officer had experienced during the period.  
43  
44 206 Occupational stress was assessed using the validated Italian versions <sup>23)</sup> of two standardized  
45  
46 207 questionnaires: the Demand-Control-Support (DCS) questionnaire, derived from the longer Job  
47  
48 208 Content Questionnaire <sup>8)</sup>, and the Effort-Reward Imbalance (ERI) questionnaire <sup>9)</sup>. DCS is a 17.item  
49  
50 209 self-report questionnaire that provides scores in three scales: *Psychological Job Demand*, (Demand,  
51  
52 210 5 items mapping quantitative aspects of work, such as time, requirement and speed to perform tasks,  
53  
54 211 and conflict among different demands), *Job Control/Decision Latitude* (Control, 6 items mapping  
55  
56  
57  
58  
59  
60

1  
2  
3 212 use and development of abilities and autonomy to make decisions about the work process) and  
4  
5 213 *Workplace Social Support* (Support, 6 items mapping relationships between coworkers and  
6  
7 214 superiors). Participants are asked to rate each item on a 4-point frequency (Demand and Control) or  
8  
9 215 agreement (Support) scale. In this study reliabilities (Cronbach's alphas) of the scales were .71, .65  
10  
11 216 and .84, respectively. Along with scale sum scores, a further index, "perceived job strain" (DCS-Job  
12  
13 217 Strain) was computed by dividing the mean item score of Demand by the mean item score of the  
14  
15 218 Control scale. A ratio of 1 indicates a balance between demand and control; values >1 indicate  
16  
17 219 excessive perceived job strain [XX]. ERI is a 23-item self-report questionnaire that assesses three  
18  
19 220 dimensions: *Effort* (6 items mapping the demanding aspects of the work environment), *Reward* (11  
20  
21 221 items mapping the occupational rewards that are supposed to be received by the person) and  
22  
23 222 *Overcommitment* (6 items mapping the intrinsic personal factors regarding occupational motivation  
24  
25 223 and participation that enhance the effects of stress). Participants are asked to rate each item on a 5-  
26  
27 224 point intensity scale. In this study reliabilities of the scales were .82, .89 and .79, respectively.  
28  
29 225 Along with scale sum scores, the weighted ratio between effort and reward (E/R Ratio) was  
30  
31 226 computed to quantify the degree of mismatch between effort and reward. Values >1 reflect an  
32  
33 227 imbalance that can induce stress [XX].

34  
35  
36  
37  
38 228 The mental health status was assessed after the third occasion using the following measures.  
39  
40 229 Depression was evaluated by the Beck Depression Inventory (BDI)<sup>24)</sup>, as this questionnaire  
41  
42 230 performed better than other tests for depression screening<sup>25,26)</sup>. The BDI consists of 21 groups of 4  
43  
44 231 alternative self-evaluation statements used to assess the presence and severity of the affective,  
45  
46 232 cognitive, motivational, psychomotor, and vegetative components of depression, with higher scores  
47  
48 233 indicating more severe depression. If multiple responses are chosen under one item, the most  
49  
50 234 symptomatic item is scored. Statement choices are scored from 0 (absent) to 3 (severe) and can total  
51  
52 235 from 0 to 63. In this study internal consistency was 0.81. The cut-off score commonly used in  
53  
54 236 clinical practice for depression screening is 10<sup>27)</sup>. The probability of suffering major depressive

1  
2  
3 237 disorder rapidly increases above this threshold; so, a higher score of 14<sup>25)</sup> or 16<sup>26)</sup> is often chosen  
4  
5 238 in order to reduce the prevalence of false positive in populations consisting of patients affected by  
6  
7 239 chronic diseases with poor or severe prognosis. In this study, we adopted the classical cut-off level  
8  
9  
10 240 of 10, as the subjects tested were young, active and highly selected.

11 241 Anxiety was evaluated by the State-Trait Anxiety Inventory–Trait (STAI-T; Spielberger et  
12  
13  
14 242 al. 1983; Italian version in Sanavio et al. 1997) The STAI-T is a 20-item self-report measure of  
15  
16 243 anxiety proneness requiring participants to rate their frequency of anxiety symptoms on a 4-point  
17  
18 244 Likert-type scale. Nine items are reverse scored. In this study the reliability of the scale was .74.  
19  
20 245 Maslach Burnout Inventory (MBI; Maslach and Jackson 1981; Italian version in Sirigatti and  
21  
22 246 Stefanile 1993) MBI is a 22-item self-report measure of professional burnout. It provides scores on  
23  
24 247 three facets of burnout: Professional Exhaustion (9 items mapping feelings of being emotionally  
25  
26 248 overextended and exhausted by one's work, Depersonalization (5 items mapping an unfeeling and  
27  
28 249 impersonal response towards the recipients of one's care) and Personal Accomplishment (8 items  
29  
30 250 mapping feelings of competence and successful achievement in one's work with people).  
31  
32 251 Participants are asked to rate the frequency of experiencing feelings related to each subscale using a  
33  
34 252 7-point, Likert-type scale. In this study reliabilities of the scales were .86, .60 and .80, respectively.  
35  
36 253 All participants were tested anonymously and confidentially during their routine psychophysical  
37  
38 254 assessment. Anonymity was achieved by identifying participants with an alphanumeric code,  
39  
40 255 double-blind. The study protocol was approved by the Ethics Committee of the Catholic University  
41  
42 256 Rome School of Medicine, the Institute of Occupational Medicine, responsible for co-coordinating  
43  
44 257 the study, and the National Police Management Board and the whole procedure followed the Ethical  
45  
46 258 Principles of Psychologists Code of Conduct (American Psychological Association 2002).  
47  
48  
49  
50

51 259 *Control Variables*

52  
53  
54 260 The control variables used in our study were: age (years), length of employment (years of service);  
55  
56 261 education level (lower vs equal/higher than high school); rank (officer vs supervisor/technical staff);  
57  
58  
59  
60

1  
2  
3 262 origin (Northern or Southern Italy); housing (in barracks or home); marital status (single/divorced  
4  
5 263 vs married/cohabiting); presence of children (no/yes).  
6

7 264 *Statistical analyses*  
8

9 265 The first research question we addressed was whether there was a relationship between the  
10  
11 266 individual level of work-related stress and mental health problems. In order to do this we used  
12  
13 267 hierarchical multiple linear regression models in which the variable the BDI score was specified as  
14  
15 268 criterion. In Model 1 we specified as predictors only the control variables. In Model 2 and 3 scale  
16  
17 269 scores from the DCS and from the ERI questionnaires, respectively, were entered in the regression  
18  
19 270 model. In Model 4 control variables and DCS and ERI scores were specified as predictors.. The  
20  
21 271 degree of association between variables is indexed by the regression coefficient computed on the  
22  
23 272 standardized variables ( $\beta$ ). The amount of variance of the depression score accounted for by the  
24  
25 273 predictors (and the goodness of fit of the regression model) was indexed by the adjusted  $R^2$ . Since  
26  
27 274 age and length of employment were highly correlated ( $r = .91$ ), only the latter was used as a  
28  
29 275 predictor. In order to minimize the potentially confounding effects of multicollinearity, we  
30  
31 276 partialized the effects through principal component analysis.  
32  
33  
34  
35

36 277 We then tested the risk of suffering from depression for an officer in a state of distress. We  
37  
38 278 used binary logistic regression, with caseness for depression (i.e., BDI score  $\geq 10$ ) as criterion and  
39  
40 279 DCS-Job Strain, social isolation (DCS-Support score below the median), isostrain (job strain plus  
41  
42 280 social isolation), Effort/Reward imbalance (E/R ratio  $>1$ ), and Over-Involvement in work (ERI-  
43  
44 281 Overcommitment score above the median) as predictors. The resulting values ("raw" or  
45  
46 282 unadjusted) were subsequently corrected by adding the socio-demographic variables to the  
47  
48 283 equation. Odds ratios (OR) and their 95% confidence intervals (95%CI) were computed.  
49  
50

51 284 **Results**  
52

53 285 Mean scale scores are reported in Table 1. The mean levels of occupational stress scores were not  
54  
55 286 particularly high when compared with those of other groups of Italian workers [Magnavita PsyJ].  
56  
57  
58  
59  
60

1  
2  
3 287 The average levels of depression, anxiety, emotional exhaustion and depersonalization scores were  
4  
5 288 close to the lower limits of the respective scales, while those of personal accomplishment were  
6  
7 289 high. Based on the Italian cut-off levels, there was no case of possible anxiety or burnout. However,  
8  
9  
10 290 there were 21 (7.3%) likely cases of mild depression ( $BDI \geq 10$ ) and 7 (2.4%) likely cases of  
11  
12 291 moderate depression ( $BDI \geq 16$ ).

14 292 Hierarchical multiple linear regression allowed us to test the extent to which the level of  
15  
16 293 depressive symptomatology that can be predicted on the basis of socio-demographic and work-  
17  
18 294 related stress data (Table 2).

---

21 295 Insert Table 2 about here

---

23 296 The association between of depression with only socio-demographic variables (Model 1) was weak  
24  
25 297 ( $Adjusted R^2 = .01$ ) and generally not significant, except a positive association with length of  
26  
27 298 employment, which was significant also in all next models. When DCS scores were entered into the  
28  
29 299 model (Model 2), a significant increase in  $Adjusted R^2$  (.10) was observed, and DCS-Control and  
30  
31 300 DCS-Support were significantly and negatively associated with BDI scores. When DCS scores  
32  
33 301 where replaced by ERI scores (Model 3), the  $Adjusted R^2$  significantly increased (.16) and the  
34  
35 302 negative regression coefficient of ERI-Reward was the only significant effect, along with the one of  
36  
37 303 length of employment. Model 4, that included all control and occupational stress variables, did not  
38  
39 304 show an  $Adjusted R^2$  significantly higher than Model 3, and the only significant predictors were  
40  
41 305 length of employment and ERI-Reward score.

45 306 The results of the logistic regression are shown in Table 3.

---

48 307 Insert Table 3 about here

---

50 308 For officers in a state of "distress" according to the DCS model ( i.e. those with a simultaneous high  
51  
52 309 level of "demand" and low level of "control"), the risk of being depressed approximately doubled,  
53  
54 310 but not significantly, whereas the other categorical predictors were all statistically significant.



1  
2  
3 311 Notably, officers with an ERI-Effort/Reward ratio higher than 1 had an approximately 7-fold higher  
4  
5 312 risk of depression than the others.  
6

7 313 The results of regression analyses performed using anxiety and MBI scores as criteria are  
8  
9 314 shown in Tables 4a-d.  
10

---

11 315 Insert Tables 4a-d about here

---

12  
13  
14 316 Anxiety was significantly associated with living in barracks, with lower scores in DCS-Support and  
15  
16 317 ERI-Reward and with higher scores in ERI-Effort. MBI Professional Exhaustion scores were higher  
17  
18 318 in older officers and in agents and were significantly predicted by higher ERI-Over-commitment  
19  
20 319 scores. MBI Depersonalization scores were higher in older officers and in officers without children,  
21  
22 320 and were significantly predicted by lower ERI-Reward scores. MBI Personal Accomplishment  
23  
24 321 scores were lower in barracked officers and in officers without children, and were significantly  
25  
26 322 predicted by higher DCS-Control scores.  
27  
28

### 29 323 **Discussion**

30  
31 324 This study investigated the association of a condition of "job distress" with the presence of self-  
32  
33 325 reported symptoms of depression, alongside with other common work-related mental problems such  
34  
35 326 as anxiety and burnout, in a special force police unit. Results from multiple regression analyses  
36  
37 327 showed that lower ERI-Effort scores predicted higher BDI scores, whereas results from logistic  
38  
39 328 regression analyses revealed that a higher effort/reward imbalance was associated with an  
40  
41 329 approximately sevenfold increase in risk of depression. These results suggest that, consistently with  
42  
43 330 previous studies, also in special force police officers the lower the reward opportunities, or the  
44  
45 331 higher the imbalance between the the effort spent to meet the demanding aspects of the work  
46  
47 332 environment and the reward (money, esteem and career opportunities, job security included), the  
48  
49 333 higher the depressive symptomatology. Studies based on the demand /control model indicate that  
50  
51 334 job strain is associated with depression (Bonde). A recent meta-analysis of studies on the  
52  
53 335 association between stress and mental disorders indicates that psychosocial problems in the  
54  
55  
56  
57  
58  
59  
60

1  
2  
3 336 workplace, reduced control, job strain, low social support, and the discrepancy between effort and  
4  
5 337 rewards predict the onset of depression <sup>36)</sup>. Another review of 14 longitudinal studies indicates that  
6  
7 338 lack of social support enhances depression <sup>37)</sup>. The association we found between low reward and  
8  
9  
10 339 symptoms is in agreement with that suggested by neurobiological studies on depression (Eshel and  
11  
12 340 Roiser). However, we could not replicate the finding that using both the DCS and the ERI model  
13  
14 341 provides greater predictive power for depressive disorders than models including only one of them  
15  
16 342 <sup>38)</sup>. In this study, only the ERI model proved to be useful in predicting depression scores of officers.  
17  
18 343 Lack of rewards and excessive over-commitment significantly increased depression scores and the  
19  
20 344 probability of disease, respectively. This result replicates the observations of Martins and Lopes <sup>39)</sup>  
21  
22 345 who argued that effort, reward and over-commitment are associated with the presence of common  
23  
24 346 mental disorders among military personnel in peacetime, and those of Kingdom and Smith <sup>40)</sup>, that  
25  
26  
27 347 showed that ERI was the most important predictor of depression among police officers in the UK  
28  
29 348 Coast Guard and, more generally, with a large body of literature on the relationship between reward  
30  
31 349 processing and depressive symptoms (Eshel & Roiser (2010)). To a lesser extent, the DCS model  
32  
33 350 captured some important aspects, such as the lack of control over the organization of work and the  
34  
35 351 lack of support from colleagues or superiors. The importance of lack of support from superior and  
36  
37 352 organization in the occurrence of depression has already been reported by Berg et al. in the  
38  
39  
40 353 Norwegian police <sup>33)</sup>, and by Arial et al. <sup>30)</sup> in a sample of Swiss police. Overall, both models appear  
41  
42 354 to be useful for diagnosing a situation of suffering which could result in disease. Although not the  
43  
44 355 main focus of this study, the ERI model also showed a good ability to predict anxiety and two of the  
45  
46 356 three core dimensions of burnout (i.e. emotional exhaustion and depersonalization), consistently  
47  
48 357 with previous studies (XX), whereas DCS-Control score was significantly associated with personal  
49  
50 358 accomplishment. Some background variables also showed a significant association with measures  
51  
52 359 of mental health. Higher length of employment (which overlaps age) was associated with higher  
53  
54 360 depressive symptomatology, anxiety, professional exhaustion and depersonalization, being  
55  
56  
57  
58  
59  
60

1  
2  
3 361 barracked was associated with higher anxiety and lower personal accomplishment, being an  
4  
5 362 operative agent was associated with higher professional exhaustion, having children was associated  
6  
7 363 with lower depersonalization. These results are in line with previous studies on armed forces  
8  
9 364 officers (XX)  
10  
11 365 Sadly, investigating stress in police officers is particularly difficult because the latter are afraid of  
12  
13 366 being identified as individuals who have been compromised by stress. They fear that this might then  
14  
15 367 cause them to be discriminated against in their careers, removed from active duties and relegated to  
16  
17 368 office work. On the other hand, a study by Summerfield <sup>7)</sup> found work stress to be the first cause of  
18  
19 369 sickness absence and reduction in operational duties, as well as the leading cause of ill health  
20  
21 370 retirement in police officers. A number of studies have previously evaluated occupational stress in  
22  
23 371 policemen using the DCS and ERI models. Job strain and effort/reward imbalance were associated  
24  
25 372 with cardiovascular risk in policewomen <sup>16)</sup>, musculoskeletal disorders in special police forces <sup>17)</sup>,  
26  
27 373 lower mental health level in correctional <sup>18)</sup> and urban police officers <sup>19)</sup>. The demand-control  
28  
29 374 model proved to be a valid theoretical framework to explain professional efficiency and exhaustion  
30  
31 375 <sup>20)</sup> and the complex interplay between job demands, emotional exhaustion and other social and  
32  
33 376 individual factors <sup>21)</sup>. Officers with greater perceived work stress in the first year of police service  
34  
35 377 showed more severe depression symptoms 12 months later <sup>22)</sup>.

378         It might be argued that only seven per cent of officers in our cohort reported a level of  
379 depressive symptomatology higher than the risk threshold.. In fact, such prevalence is lower than  
380 that found by by Fox et al. <sup>28)</sup> in urban US police officer (9%), by Frühwald et al. <sup>29)</sup> in Lower  
381 Austria (9%), by Arial et al. <sup>30)</sup> in a Swiss officers (11.9%), by Chen et al. <sup>31)</sup> in Taiwanese officers  
382 (21.6%), and by Obidoa et al. <sup>32)</sup> among US corrections officers (31%), and it is comparable with  
383 that found in other working populations <sup>12-15)</sup>. Moreover, a nationwide study in the Norwegian  
384 police service showed that the younger police officers reported lower levels of depressive  
385 symptoms than the corresponding general population <sup>33)</sup>. A recent comparison of police and other

1  
2  
3 386 employees found no indications that self-reported mental health disturbances are more prevalent  
4  
5 387 among police officers than among groups of employees that are not considered high-risk groups<sup>34</sup>.  
6  
7 388 Since our sample was composed by young and highly selected police officers, which also shown an  
8  
9 389 emotional stability higher than the general population (XX) this result is not surprising. However,  
10  
11 390 this does not mean that the problem of depression in this special unit is negligible, and it cannot be  
12  
13 391 ignored that, beyond individual's health related risk factors, depression represents a considerable  
14  
15 392 cost for productivity both in terms of absenteeism and presenteeism<sup>35</sup>) and, more importantly given  
16  
17 393 that the delicate tasks the officers of this study have to accomplish, it increases the possibility of  
18  
19 394 errors and the risk to the health and safety of others. Hence, officers with depressive symptoms  
20  
21 395 should obtain timely and confidential assistance and the causes of excessive occupational stress  
22  
23 396 must be promptly identified and removed or minimized.

24  
25  
26  
27 397 The results reported in this study should be interpreted with caution, as all the measures  
28  
29 398 were self-reported questionnaires, and thus reporting bias and subjectivity may have distorted the  
30  
31 399 observations. Depressed persons could be more likely to report psychosocial stress at work, even if  
32  
33 400 objectively their work environment is not at risk *per se*. The cross-sectional nature of the research  
34  
35 401 does not allow us to infer the direction of the observed phenomena, and thus separate cause from  
36  
37 402 effect. Specifically, we could not address the issue of whether the observed reduction in experience  
38  
39 403 of reward is an epiphenomenon of the presence of depressive symptoms. Finally, because our  
40  
41 404 sample corresponds to a specific police unit, and it is a relatively small cohort, our results may not  
42  
43 405 be generalizable to police officers in general, with different occupational exposure, nor to special  
44  
45 406 forces in countries with different ethnic or cultural characteristics. However, our study also has  
46  
47 407 several important strengths. To our knowledge, this is the first study to investigate associations of  
48  
49 408 depression with work stress in terms of both DCS and ERI models in special force police officers.  
50  
51 409 Such population has a high exposure to homogenous occupational risks, while many studies include  
52  
53 410 persons who perform very different tasks. The participation rate was very high (99%). Finally, since  
54  
55  
56  
57  
58  
59  
60

1  
2  
3 411 the measurements used in this study have been validated in several other studies, our results are  
4  
5 412 more comparable with other research findings.  
6

7 413 Limitations notwithstanding, the present findings indicate that some aspects of psychosocial  
8  
9 414 environment at work, such as the imbalance between effort and reward, are associated with  
10  
11 415 depressive symptoms, anxiety and burnout in special force police officers. Although we could not  
12  
13 416 establish a casual relationships and these results need to be replicated in longitudinal studies, they  
14  
15 417 suggest that the dimensions of effort, reward and overcommitment can be useful in monitoring  
16  
17 418 special force police officers' psychological functioning.  
18  
19

20  
21 419  
22  
23  
24  
25  
26  
27  
28  
29  
30  
31  
32  
33  
34  
35  
36  
37  
38  
39  
40  
41  
42  
43  
44  
45  
46  
47  
48  
49  
50  
51  
52  
53  
54  
55  
56  
57  
58  
59  
60

420 **References**

421

- 422 1. Komarovskaya I, Maguen S, McCaslin SE, Metzler TJ, Madan A, Brown AD, et al. The  
423 impact of killing and injuring others on mental health symptoms among police officers. *J*  
424 *Psychiatr Res.* 2011;45(10):1332-6.
- 425 2. Brown J, Fielding J, Grover J. Distinguishing traumatic, vicarious and routine operational  
426 stressor exposure and attendant adverse consequences in a sample of police officers. *Work*  
427 *Stress* 1999; 13:312-325
- 428 3. Leino TM, Selin R, Summala H, Virtanen M. Violence and psychological distress among  
429 police officers and security guards. *Occup Med (London)* 2011; 61 (6): 400-406
- 430 4. Berg AM, Hem E, Lau B, Håseth K, Ekeberg O. Stress in the Norwegian police service.  
431 *Occup Med (Lond).* 2005; 55(2):113-20.
- 432 5. Garbarino S, Magnavita N, Elovainio M, Heponiemi T, Ciprani F, Cuomo G, Bergamaschi  
433 A. Police job strain during routine activities and a major event. *Occup Med (Lond).* 2011;  
434 61(6):395-9.
- 435 6. Winwood PC, Peters R, Peters M, Dollard M. Further validation of the psychological injury  
436 risk indicator scale. *J Occup Environ Med.* 2012;54(4):478-84.
- 437 7. Summerfield D. Metropolitan Police blues: protracted sickness absence, ill health  
438 retirement, and the occupational psychiatrist. *BMJ.* 2011;342:d2127.
- 439 8. Karasek RA. Job demands, job decision latitude, and mental strain. Implication for job  
440 redesign. *Adm Sci Q* 1979; 24: 285-308
- 441 9. Siegrist J. Adverse health effects of high-effort/low-reward conditions. *J Occup Health*  
442 *Psychol* 1996; 1:27-41
- 443 10. Magnavita N, Garbarino S. Social psychiatry in the waiting room. What a physician can  
444 learn about occupational stress from workers waiting to be examined. *Psy J*, 2012 (in press)

- 1  
2  
3 445 11. Nieuwenhuijsen K, Bruinvels D, Frings-Dresen M. Psychosocial work environment and  
4  
5 446 stress-related disorders, a systematic review. *Occup Med (Lond)*. 2010; 60(4):277-86.  
6  
7 447 12. Pflanz SE, Ogle AD. Job stress, depression, work performance, and perceptions of  
8  
9 448 supervisors in military personnel. *Mil Med*. 2006;171(9):861-5.  
10  
11 449 13. Iversen AC, van Staden L, Hughes JH, Browne T, Hull L, Hall J et al. The prevalence of  
12  
13 450 common mental disorders and PTSD in the UK military: using data from a clinical  
14  
15 451 interview-based study. *BMC Psychiatry*. 2009;9:68.  
16  
17 452 14. Alonso J, Angermeyer MC, Bernert S, Bruffaerts R, Brugha TS, Bryson H, et al. Prevalence  
18  
19 453 of mental disorders in Europe: results from the European Study of the Epidemiology of  
20  
21 454 Mental Disorders (ESEMeD) project. *Acta Psychiatr Scand Suppl*. 2004; (420):21-7.  
22  
23 455 15. Huang SL, Lee HS, Li RH, Lai YM, Chen AL, Tang FC. Differences in health complaints  
24  
25 456 among Taiwanese workers in different occupational categories. *J Occup Health* 2012;  
26  
27 457 54(3):241-9.  
28  
29 458 16. Yoo H, Franke WD. Stress and cardiovascular disease risk in female law enforcement  
30  
31 459 officers. *Int Arch Occup Environ Health*. 2011; 84(3):279-86.  
32  
33 460 17. von dem Knesebeck O, David K, Siegrist J. Psychosocial stress at work and musculoskeletal  
34  
35 461 pain among police officers in special forces. *Gesundheitswesen*. 2005; 67(8-9):674-9.  
36  
37 462 18. Bourbonnais R, Jauvin N, Dussault J, Vézina M. Psychosocial work environment,  
38  
39 463 interpersonal violence at work and mental health among correctional officers. *Int J Law*  
40  
41 464 *Psychiatry*. 2007; 30(4-5):355-68.  
42  
43 465 19. Janzen BL, Muhajarine N, Zhu T, Kelly IW. Effort-reward imbalance, overcommitment, and  
44  
45 466 psychological distress in Canadian police officers. *Psychol Rep*. 2007; 100(2):525-30.  
46  
47 467 20. Taris TW, Kompier MAJ, Geurts SAE, Houtman ILD, van den Heuvel FFM. Professional  
48  
49 468 efficacy, exhaustion, and work characteristics among police officers: A longitudinal test of  
50  
51  
52  
53  
54  
55  
56  
57  
58  
59  
60

- 1  
2  
3 469 the learning-related predictions of the demand-control model. *J Occup Organizat Psychol*  
4  
5 470 2010; 83: 455-474  
6  
7 471 21. Hall GB, Dollard MF, Tuckey MR, Winefield AH, Thompson BM. Job demands, work-  
8  
9 472 family conflicts, and emotional exhaustion in police officers: a longitudinal test of  
10  
11 473 competing theories. *J Occup Organizat Psychol* 2010; 83: 237-250.  
12  
13 474 22. Wang Z, Inslicht SS, Metzler TJ, Henn-Haase C, McCaslin SE, Tong H, et al. A prospective  
14  
15 475 study of predictors of depression symptoms in police. *Psychiatry Res.* 2010;175(3):211-6.  
16  
17 476 23. Magnavita N. Two tools for health surveillance of job stress: the Karasek Job Content  
18  
19 477 Questionnaire and the Siegrist Effort Reward Imbalance Questionnaire. *G Ital Med Lav*  
20  
21 478 *Ergon* 2007; 29 (3): 667-670  
22  
23 479 24. Beck AT, Rush AJ, Shaw BF, Emery G. Cognitive therapy of depression. Guilford Press,  
24  
25 480 New York 1979  
26  
27 481 25. Bunevicius A, Staniute M, Brozaitiene J, Pommer AM, Pop VJ, Montgomery SA,  
28  
29 482 Bunevicius R. Evaluation of depressive symptoms in patients with coronary artery disease  
30  
31 483 using the Montgomery Åsberg Depression Rating Scale. *Int Clin Psychopharmacol.*  
32  
33 484 2012;27(5):249-55  
34  
35 485 26. Preljevic VT, Osthus TB, Sandvik L, Opjordsmoen S, Nordhus IH, Os I, Dammen T.  
36  
37 486 Screening for anxiety and depression in dialysis patients: Comparison of the Hospital  
38  
39 487 Anxiety and Depression Scale and the Beck Depression Inventory. *J Psychosom Res.*  
40  
41 488 2012;73(2):139-44.  
42  
43 489 27. Adachi Y, Aleksic B, Nobata R, Suzuki T, Yoshida K, Ono Y, Ozaki N. Combination use of  
44  
45 490 Beck Depression Inventory and two-question case-finding instrument as a screening tool for  
46  
47 491 depression in the workplace. *BMJ Open.* 2012;2(3). pii: e000596.  
48  
49  
50  
51  
52  
53  
54  
55  
56  
57  
58  
59  
60



- 1  
2  
3 492 28. Fox J, Desai MM, Britten K, Lucas G, Luneau R, Rosenthal MS. Mental-health conditions,  
4  
5 493 barriers to care, and productivity loss among officers in an urban police department. *Conn*  
6  
7 494 *Med.* 2012;76(9):525-31.
- 9 495 29. Frühwald S, Entenfellner A, Grill W, Korbel C, Frottier P. Raising awareness about  
10  
11 496 depression together with service users and relatives - results of workshops for police officers  
12  
13 497 in Lower Austria. *Neuropsychiatr.* 2011;25(4):183-91.
- 15 498 30. Arial M, Gonik V, Wild P, Danuser B. Association of work related chronic stressors and  
16  
17 499 psychiatric symptoms in a Swiss sample of police officers; a cross sectional questionnaire  
18  
19 500 study. *Int Arch Occup Environ Health* 2010; 83: 323-331.
- 21 501 31. Chen HC, Chou FH, Chen MC, Su SF, Wang SY, Feng WW, et al. A survey of quality of  
22  
23 502 life and depression for police officers in Kaohsiung, Taiwan. *Qual Life Res.*  
24  
25 503 2006;15(5):925-32.
- 27 504 32. Obidoa C, Reeves D, Warren N, Reisine S, Cherniack M. Depression and work family  
28  
29 505 conflict among corrections officers. *J Occup Environ Med.* 2011;53(11):1294-301.
- 31 506 33. Berg AM, Hem E, Lau B, Ekeberg Ø. An exploration of job stress and health in the  
32  
33 507 Norwegian police service: a cross sectional study. *J Occup Med Toxicol.* 2006 ;1:26.
- 35 508 34. van der Velden PG, Rademaker AR, Vermetten E, Portengen MA, Yzermans JC, Grievink  
36  
37 509 L. Police officers: a high-risk group for the development of mental health disturbances? A  
38  
39 510 cohort study. *BMJ Open.* 2013 Jan 24;3(1). doi:pii: e001720. 10.1136/bmjopen-2012-  
40  
41 511 001720
- 43 512 35. Lee YM . Loss of productivity due to depression among Korean employees *J Occup Health*  
44  
45 513 2010; 52: 389-394.
- 47 514 36. Stansfeld S, Candy B. Psychosocial work environment and mental health--a meta-analytic  
48  
49 515 review. *Scand J Work Environ Health.* 2006; 32(6):443-62.

- 1  
2  
3 516 37. Netterstrøm B, Conrad N, Bech P, Fink P, Olsen O, Rugulies R, Stansfeld S. The relation  
4  
5 517 between work-related psychosocial factors and the development of depression. *Epidemiol*  
6  
7 518 *Rev.* 2008; 30:118-32.
- 8  
9 519 38. Chen SW, Wang PC, Hsin PL, Oates A, Sun IW, Liu SI. Job stress models, depressive  
10  
11 520 disorders and work performance of engineers in microelectronics industry. *Int Arch Occup*  
12  
13 521 *Environ Health* 2011; 84(1):91-103.
- 14  
15 522 39. Martins LCX, Lopes CS. Military hierarchy, job stress and mental health in peacetime. *Occ*  
16  
17 523 *Med (Oxford)* 2012; 62: 182-187
- 18  
19 524 40. Kingdom SE, Smith AP. Combined effects of work-related stress in Her Majesty's  
20  
21 525 Coastguard (HMCG). *Int Marit Health.* 2012;63(1):63-70.
- 22  
23 526 41. Bonde JPE. Psychosocial factors at work and risk of depression: a systematic review of the  
24  
25 527 epidemiological evidence. *Occup Environ Med,* 2008;65:438-445.  
26  
27 528 doi:10.1136/oem.2007.038430
- 28  
29 529 42. Eshel N, Roiser JP. Reward and punishment processing in depression. *Biol Psych* 2010;  
30  
31 530 68(2): 118-124. DOI: 10.1016/j.biopsych.2010.01.027
- 32  
33 531 43. Garbarino S, Magnavita N, Chiorri C, Brisinda D, Cuomo G , Venuti A, Fenici R.  
34  
35 532 Evaluation of operational stress in riot and crowd control police units: A global challenge  
36  
37 533 for prevention and management of police task-related stress. *J Police Crim Psychol.* 2012;  
38  
39 534 27(2): 111-122 DOI 10.1007/s11896-012-9104-8
- 40  
41 535 44. Magnavita N, Garbarino S. Is absence related to work stress? A repeated cross-sectional  
42  
43 536 study on a special police force. *AJIM* 2013 Jan 17 Published online in Wiley Online Library  
44  
45 537 DOI10.1002/ajim.22155.
- 46  
47 538 45. McEwen BS. Stress, adaptation and disease. Allostasis and allostatic load. *Ann N Y Acad*  
48  
49 539 *Sci* 1998; 840: 33-44.
- 50  
51  
52  
53  
54  
55  
56  
57  
58  
59  
60

- 1  
2  
3 540 46. Cooper B. Mental health epidemiology today: a monitor of distress. *Epidemiol Psychiatr*  
4  
5 541 *Sci.* 2012;21(2):171-3  
6  
7 542 47. Garbarino S, Chiorri C, Magnavita N. Personality traits of the Five-Factor Model are  
8  
9 543 associated with work-related stress in special force police officers. *IAOEH* 2013 Mar 6 DOI:  
10 544 10.1007/s00420-013-0861-1  
11  
12  
13 545 48. Garbarino S, Chiorri C, Magnavita N, Piattino S, Cuomo G. Personality profiles among  
14  
15 546 Special Force police officers. *J Police Crim Psychol* 2012; 27(2): 99-110.  
16  
17  
18 547 49. Cherry NM, Chen Y, McDonald JC. Reported incidence and precipitating factors of work-  
19  
20 548 related stress and mental ill-health in the United Kingdom (1996-2001). *Occup Med (Lond).*  
21  
22 549 2006;56(6):414-21.  
23  
24  
25 550 50. Melchior M, Caspi A, Milne BJ, Danese A, Poulton R, Moffitt TE. Work stress precipitates  
26  
27 551 depression and anxiety in young, working women and men. *Psychol Med.* 2007;  
28  
29 552 37(8):1119-29.  
30  
31  
32 553 51. Yuan C, Wang Z, Inslicht SS, McCaslin SE, Metzler TJ, Henn-Haase C, Apfel BA, Tong H,  
33  
34 554 Neylan TC, Fang Y, Marmar CR. Protective factors for posttraumatic stress disorder  
35  
36 555 symptoms in a prospective study of police officers. *Psychiatry Res.* 2011;188(1):45-50.  
37  
38  
39 556 52. Evans R, Pistrang N, Billings J. Police officers' experiences of supportive and unsupportive  
40  
41 557 social interactions following traumatic incidents. *Eur J Psychotraumatol.* 2013;4. doi:  
42  
43 558 10.3402/ejpt.v4i0.19696.  
44  
45  
46 559 53. Galatzer-Levy IR, Brown AD, Henn-Haase C, Metzler TJ, Neylan TC, Marmar CR. Positive  
47  
48 560 and Negative Emotion Prospectively Predict Trajectories of Resilience and Distress Among  
49  
50 561 High-Exposure Police Officers. *Emotion.* 2013 Jan 21.  
51  
52 562 54. Violanti JM. Police organizational stress: the impact of negative discipline. *Int J Emerg*  
53  
54 563 *Ment Health.* 2011;13(1):31-6.  
55  
56  
57  
58  
59  
60

- 1  
2  
3 564 55. Marchand A, Blanc ME. The contribution of work and non-work factors to the onset of  
4  
5 565 psychological distress: an eight-year prospective study of a representative sample of  
6  
7 566 employees in Canada. *J Occup Health*. 2010; 52(3):176-85.  
8  
9  
10 567 56. van Rhenen W, van Dijk FJ, Schaufeli WB, Blonk RW. Distress or no distress, that's the  
11  
12 568 question: A cutoff point for distress in a working population. *J Occup Med Toxicol*. 2008;  
13  
14 569 18;3:3.  
15  
16 570 57. Jones M, Rona RJ, Hooper R, Wessely S. The burden of psychological symptoms in UK  
17  
18 571 Armed Forces *Occup Med (Lond)*. 2006;56(5):322-8.  
19  
20  
21 572 58. Iversen A, Dyson C, Smith N, et al. Prevalence of mental disorders in Europe: results from  
22  
23 573 the European Study of the Epidemiology of Mental Disorders (ESEMeD) project. *Acta*  
24  
25 574 *Psychiatr Scand Suppl*. 2004; 420:21-7.  
26  
27 575 59. Hilton MF, Whiteford HA, Sheridan JS, et al. The prevalence of psychological distress in  
28  
29 576 employees and associated occupational risk factors. *J Occup Environ Med* 2008; 50(7):746-  
30  
31 577 57.  
32  
33  
34 578 60. Fan ZJ, Bonauto DK, Foley MP, Anderson NJ, Yragui NL, Silverstein BA. Occupation and  
35  
36 579 the prevalence of current depression and frequent mental distress, WA BRFSS 2006 and  
37  
38 580 2008. *Am J Ind Med*. 2012;55(10):893-903. doi: 10.1002/ajim.22094.  
39  
40  
41 581 61. van der Klink JJ, van Dijk FJ. Dutch practice guidelines for managing adjustment disorders  
42  
43 582 in occupational and primary health care. *Scand J Work Environ Health*. 2003; 29(6):478-87.  
44  
45  
46  
47  
48  
49  
50  
51  
52  
53  
54  
55  
56  
57  
58  
59  
60

1 Table 1. Socio-demographical characteristics, occupational stress scores and mental health scores of  
 2 the participants in this study ( $n=289$ )

| <i>Variable</i>                                        | <i>Statistics</i> |
|--------------------------------------------------------|-------------------|
| Socio-demographical variables                          |                   |
| Age, years ( $M\pm DS$ )                               | 35.4 $\pm$ 7.5    |
| Length of service, years ( $M\pm DS$ )                 | 14.0 $\pm$ 7.9    |
| Rank, superintendent or technical staff, frequency (%) | 140 (48.4)        |
| Education level, high school or higher, frequency (%)  | 217 (75.1)        |
| Origin, Northern Italy, frequency (%)                  | 145 (50.2)        |
| Living in barracks, frequency (%)                      | 162 (56.1)        |
| Married or cohabiting, frequency (%)                   | 108 (37.4)        |
| Presence of children, frequency (%)                    | 106 (36.7)        |
| Occupational stress variables                          |                   |
| DCS-Demand ( $M\pm DS$ ) (range 5-20)                  | 13.4 $\pm$ 2.02   |
| DCS-Control ( $M\pm DS$ ) (range 6-24)                 | 13.3 $\pm$ 2.7    |
| DCS-Support ( $M\pm DS$ ) (range 6-24)                 | 18.6 $\pm$ 2.9    |
| DCS-Job Strain (Demand/Control ratio) ( $M\pm DS$ )    | 1.31 $\pm$ 0.41   |
| ERI-Effort ( $M\pm DS$ ) (range 6-30)                  | 15.0 $\pm$ 3.2    |
| ERI-Reward ( $M\pm DS$ ) (range 11-55)                 | 42.3 $\pm$ 6.2    |
| ERI-Over-commitment ( $M\pm DS$ ) (range 6-24)         | 6.9 $\pm$ 1.9     |
| ERI-Weighted Effort/Reward ratio( $M\pm DS$ )          | 0.70 $\pm$ 0.28   |
| Mental health variables                                |                   |
| BDI (range 0-63)                                       | 3.3 $\pm$ 4.2     |
| STAI-T (range 20-50)                                   | 27.5 $\pm$ 4.3    |
| MBI-Emotional Exhaustion (range 9-36)                  | 17.4 $\pm$ 7.9    |
| MBI-Depersonalization (range 5-35)                     | 9.3 $\pm$ 4.5     |
| MBI-Personal Accomplishment (range 8-56)               | 42.7 $\pm$ 9.8    |

3 Note: DCS: Demand-Control-Support Questionnaire<sup>16,33</sup>; ERI: Effort-Reward Imbalance  
 4 Questionnaire<sup>17,33</sup>; BDI: Beck Depression Inventory<sup>36</sup>; STAI-T: State-Trait Anxiety Inventory-  
 5 Trait<sup>40,41</sup>; MBI: Maslach Burnout Inventory<sup>42,43</sup>

7 Table 2. Standardized regression coefficients ( $\beta$ s) for control socio-demographic variables and  
 8 occupational stress variables as predictors of Beck Depression Inventory depression scores.

| <i>Predictor</i>              | <i>Model 1</i> | <i>Model 2</i> | <i>Model 3</i> | <i>Model 4</i> |
|-------------------------------|----------------|----------------|----------------|----------------|
| Control variables             |                |                |                |                |
| Length of employment (years)  | .12*           | .16**          | .16**          | .18**          |
| Rank                          | -.06           | -.05           | -.01           | .00            |
| Education                     | .07            | .09            | .08            | .09            |
| Origin                        | -.03           | -.06           | -.04           | -.05           |
| Marital status                | -.02           | .02            | .01            | .02            |
| Barracked                     | -.10           | -.07           | -.06           | -.05           |
| Children                      | -.03           | -.02           | -.02           | -.01           |
| Occupational stress variables |                |                |                |                |
| DCS-Demand                    |                | .10            |                | -.02           |
| DCS-Control                   |                | -.13*          |                | -.07           |
| DCS-Support                   |                | -.21**         |                | -.10           |
| ERI-Effort                    |                |                | .06            | .09            |
| ERI-Reward                    |                |                | -.30***        | -.22**         |
| ERI-Over-commitment           |                |                | .12            | .11            |
| Adjusted $R^2$                | .01            | .10***         | .16***         | .16***         |

9 Note: Rank: Agent ('agente' or 'agente scelto')=0, Other=1; Education: High school or higher=0,  
 10 Lower than high school=1; Origin: Northern Italy=0, Southern Italy=1; Marital Status: single or  
 11 divorced=0, Married or cohabiting=1; Barracked: No=0, Yes=1; Children: No=0, Yes=1;  
 12  $n = 289$ ; \* =  $p < .05$ ; \*\* =  $p < .01$ ; \*\*\* =  $p < .001$ ;

15 Table 3. Odds ratios (ORs) for the association between risk of major depression (Beck Depression  
 16 Inventory score  $\geq 10$ ) and occupational stress indicators, unadjusted and adjusted<sup>^</sup>

| <i>Occupational stress variable</i>                                   | <i>Prevalence-cases<br/>n (%)</i> | <i>Unadjusted<br/>OR (95%CI)</i> | <i>Adjusted<br/>OR (95%CI)</i> |
|-----------------------------------------------------------------------|-----------------------------------|----------------------------------|--------------------------------|
| DCS-Job strain (weighted Demand/Control ratio > 1)                    | 73 (25.3)                         | 1.92 (0.76-4.84)                 | 2.67 (0.93-7.69)               |
| Social isolation (DCS-Support score below the median)                 | 154 (53.3)                        | 3.01 (1.07-8.46)*                | 3.47 (1.16-10.38)*             |
| Isostrain (Job strain+Social isolation)                               | 50 (17.3)                         | 2.62 (1.00-6.86)*                | 3.72 (1.26-10.95)*             |
| ERI-Effort/Reward imbalance (Effort/Reward ratio >1)                  | 32 (11.1)                         | 6.26 (2.36-16.59)***             | 7.39 (2.46-22.23)***           |
| ERI- Over-Involvement in work (Overcommitment score above the median) | 37 (12.8)                         | 3.06 (1.11-8.46)*                | 3.85 (1.28-11.54)*             |

17 Note:  $n = 289$ ; <sup>^</sup>: adjustments were made for age, length of employment, rank, education level,  
 18 origin, being married or cohabiting, living in barracks, having children); \* =  $p < .05$ ; \*\* =  $p < .01$ ;  
 19 \*\*\* =  $p < .001$ ;

1  
2  
3 1 Table 4a. Standardized correlation coefficients (beta) for socio-demographic variables, stress  
4 2 measurements and State-Trait Anxiety Inventory-Trait scores.

| <i>Predictor</i>              | <i>Model 1</i> | <i>Model 2</i> | <i>Model 3</i> | <i>Model 4</i> |
|-------------------------------|----------------|----------------|----------------|----------------|
| Control variables             |                |                |                |                |
| Length of employment (years)  | .08            | .11            | .11*           | .12*           |
| Rank                          | .06            | .06            | .11            | .11            |
| Education                     | .03            | .04            | .03            | .04            |
| Origin                        | -.07           | -.10           | -.08           | -.09           |
| Marital status                | .02            | .05            | .05            | .05            |
| Barracked                     | .13*           | .14*           | .16**          | .16**          |
| Children                      | -.06           | -.05           | -.04           | -.04           |
| Occupational stress variables |                |                |                |                |
| DCS-Demand                    |                | .01            |                | -.11           |
| DCS-Control                   |                | -.07           |                | -.02           |
| DCS-Support                   |                | -.25***        |                | -.16*          |
| ERI-Effort                    |                |                | .12            | .17*           |
| ERI-Reward                    |                |                | -.25**         | -.18*          |
| ERI-Over-commitment           |                |                | .01            | .00            |
| Adjusted $R^2$                | .01            | .08***         | .11***         | .13***         |

3 Note: Rank: Agent ('agente' or 'agente scelto')=0, Other=1; Education: High school or higher=0,  
4 Lower than high school=1; Origin: Northern Italy=0, Southern Italy=1; Marital Status: single or  
5 divorced=0, Married or cohabiting=1; Barracked: No=0, Yes=1; Children: No=0, Yes=1;  
6  $n = 289$ ; \* =  $p < .05$ ; \*\* =  $p < .01$ ; \*\*\* =  $p < .001$ ;



9 Table 4b. Standardized regression coefficients ( $\beta$ s) for control socio-demographic variables and  
 10 occupational stress variables as predictors of Maslach Burnout Inventory professional exhaustion  
 11 scores.

| <i>Predictor</i>              | <i>Model 1</i> | <i>Model 2</i> | <i>Model 3</i> | <i>Model 4</i> |
|-------------------------------|----------------|----------------|----------------|----------------|
| Control variables             |                |                |                |                |
| Length of employment (years)  | .13*           | .16**          | .18**          | .19**          |
| Rank                          | -.20**         | -.19**         | -.14**         | -.13*          |
| Education                     | .06            | .06            | .04            | .04            |
| Origin                        | -.02           | -.04           | -.03           | -.04           |
| Marital status                | -.05           | -.02           | -.02           | -.02           |
| Barracked                     | -.05           | -.03           | -.01           | .00            |
| Children                      | -.09           | -.09           | -.08           | -.08           |
| Occupational stress variables |                |                |                |                |
| DCS-Demand                    |                | .16**          |                | .02            |
| DCS-Control                   |                | -.10           |                | -.06           |
| DCS-Support                   |                | -.13*          |                | -.02           |
| ERI-Effort                    |                |                | .14*           | .14            |
| ERI-Reward                    |                |                | -.18**         | -.14           |
| ERI-Over-commitment           |                |                | .23***         | .23***         |
| Adjusted $R^2$                | .05**          | .12***         | .23***         | .23***         |

12 Note: Rank: Agent ('agente' or 'agente scelto')=0, Other=1; Education: High school or higher=0,  
 13 Lower than high school=1; Origin: Northern Italy=0, Southern Italy=1; Marital Status: single or  
 14 divorced=0, Married or cohabiting=1; Barracked: No=0, Yes=1; Children: No=0, Yes=1;  
 15  $n = 289$ ; \* =  $p < .05$ ; \*\* =  $p < .01$ ; \*\*\* =  $p < .001$ ;

17 Table 4c. Standardized regression coefficients ( $\beta$ s) for control socio-demographic variables and  
 18 occupational stress variables as predictors of Maslach Burnout Inventory depersonalization score.

| <i>Predictor</i>              | <i>Model 1</i> | <i>Model 2</i> | <i>Model 3</i> | <i>Model 4</i> |
|-------------------------------|----------------|----------------|----------------|----------------|
| Control variables             |                |                |                |                |
| Length of employment (years)  | .08            | .11            | .12*           | .13*           |
| Rank                          | -.08           | -.07           | -.03           | -.02           |
| Education                     | .00            | .02            | .02            | .03            |
| Origin                        | -.02           | -.04           | -.03           | -.03           |
| Marital status                | -.09           | -.06           | -.06           | -.06           |
| Barracked                     | -.05           | -.03           | -.01           | -.01           |
| Children                      | -.18**         | -.17**         | -.16**         | -.16**         |
| Occupational stress variables |                |                |                |                |
| DCS-Demand                    |                | .05            |                | -.08           |
| DCS-Control                   |                | -.11           |                | -.04           |
| DCS-Support                   |                | -.23***        |                | -.10           |
| ERI-Effort                    |                |                | .05            | .08            |
| ERI-Reward                    |                |                | -.34***        | -.29***        |
| ERI-Over-commitment           |                |                | .08            | .08            |
| Adjusted $R^2$                | .03*           | .11***         | .19***         | .19***         |

19 Note: Rank: Agent ('agente' or 'agente scelto')=0, Other=1; Education: High school or higher=0,  
 20 Lower than high school=1; Origin: Northern Italy=0, Southern Italy=1; Marital Status: single or  
 21 divorced=0, Married or cohabiting=1; Barracked: No=0, Yes=1; Children: No=0, Yes=1;  
 22  $n = 289$ ; \* =  $p < .05$ ; \*\* =  $p < .01$ ; \*\*\* =  $p < .001$ ;

24 Table 4d. Standardized regression coefficients ( $\beta$ s) for control socio-demographic variables and  
 25 occupational stress variables as predictors of Maslach Burnout Inventory personal accomplishment  
 26 score.

| <i>Predictor</i>              | <i>Model 1</i> | <i>Model 2</i> | <i>Model 3</i> | <i>Model 4</i> |
|-------------------------------|----------------|----------------|----------------|----------------|
| Control variables             |                |                |                |                |
| Length of employment (years)  | .06            | .01            | .04            | .00            |
| Rank                          | .01            | -.02           | -.01           | -.04           |
| Education                     | .01            | -.03           | .01            | -.03           |
| Origin                        | .09            | .10            | .10            | .10            |
| Marital status                | .11            | .08            | .09            | .08            |
| Barracked                     | -.09           | -.14*          | -.11           | -.15*          |
| Children                      | .05            | .01            | .04            | .01            |
| Occupational stress variables |                |                |                |                |
| DCS-Demand                    |                | .00            |                | .06            |
| DCS-Control                   |                | .24***         |                | .22**          |
| DCS-Support                   |                | .05            |                | .00            |
| ERI-Effort                    |                |                | -.02           | -.06           |
| ERI-Reward                    |                |                | .15*           | .08            |
| ERI-Over-commitment           |                |                | -.08           | -.09           |
| Adjusted $R^2$                | .01            | .06**          | .04*           | .07            |

27 Note: Rank: Agent ('agente' or 'agente scelto')=0, Other=1; Education: High school or higher=0,  
 28 Lower than high school=1; Origin: Northern Italy=0, Southern Italy=1; Marital Status: single or  
 29 divorced=0, Married or cohabiting=1; Barracked: No=0, Yes=1; Children: No=0, Yes=1;  
 30  $n = 289$ ; \* =  $p < .05$ ; \*\* =  $p < .01$ ; \*\*\* =  $p < .001$ ;

STROBE 2007 (v4) Statement—Checklist of items that should be included in reports of *cross-sectional studies*

| Section/Topic                | Item # | Recommendation                                                                                                                                                                       | Reported on page # |
|------------------------------|--------|--------------------------------------------------------------------------------------------------------------------------------------------------------------------------------------|--------------------|
| Title and abstract           | 1      | (a) Indicate the study's design with a commonly used term in the title or the abstract                                                                                               | 1                  |
|                              |        | (b) Provide in the abstract an informative and balanced summary of what was done and what was found                                                                                  | 2                  |
| <b>Introduction</b>          |        |                                                                                                                                                                                      |                    |
| Background/rationale         | 2      | Explain the scientific background and rationale for the investigation being reported                                                                                                 | 4-7                |
| Objectives                   | 3      | State specific objectives, including any prespecified hypotheses                                                                                                                     | 8                  |
| <b>Methods</b>               |        |                                                                                                                                                                                      |                    |
| Study design                 | 4      | Present key elements of study design early in the paper                                                                                                                              | 8                  |
| Setting                      | 5      | Describe the setting, locations, and relevant dates, including periods of recruitment, exposure, follow-up, and data collection                                                      | 8-10               |
| Participants                 | 6      | (a) Give the eligibility criteria, and the sources and methods of selection of participants                                                                                          | 8-10               |
| Variables                    | 7      | Clearly define all outcomes, exposures, predictors, potential confounders, and effect modifiers. Give diagnostic criteria, if applicable                                             | 9-10               |
| Data sources/<br>measurement | 8*     | For each variable of interest, give sources of data and details of methods of assessment (measurement). Describe comparability of assessment methods if there is more than one group | 8-10               |
| Bias                         | 9      | Describe any efforts to address potential sources of bias                                                                                                                            | 10                 |
| Study size                   | 10     | Explain how the study size was arrived at                                                                                                                                            | 8                  |
| Quantitative variables       | 11     | Explain how quantitative variables were handled in the analyses. If applicable, describe which groupings were chosen and why                                                         | 10-11              |
| Statistical methods          | 12     | (a) Describe all statistical methods, including those used to control for confounding                                                                                                | 10-11              |
|                              |        | (b) Describe any methods used to examine subgroups and interactions                                                                                                                  | 11                 |
|                              |        | (c) Explain how missing data were addressed                                                                                                                                          | 8; 10-11           |
|                              |        | (d) If applicable, describe analytical methods taking account of sampling strategy                                                                                                   | 11                 |
|                              |        | (e) Describe any sensitivity analyses                                                                                                                                                | 11                 |
| <b>Results</b>               |        |                                                                                                                                                                                      |                    |

|                          |     |                                                                                                                                                                                                              |         |
|--------------------------|-----|--------------------------------------------------------------------------------------------------------------------------------------------------------------------------------------------------------------|---------|
| Participants             | 13* | (a) Report numbers of individuals at each stage of study—eg numbers potentially eligible, examined for eligibility, confirmed eligible, included in the study, completing follow-up, and analysed            | Tab 1   |
|                          |     | (b) Give reasons for non-participation at each stage                                                                                                                                                         | 8       |
|                          |     | (c) Consider use of a flow diagram                                                                                                                                                                           | n/a     |
| Descriptive data         | 14* | (a) Give characteristics of study participants (eg demographic, clinical, social) and information on exposures and potential confounders                                                                     | Tab 1   |
|                          |     | (b) Indicate number of participants with missing data for each variable of interest                                                                                                                          | n/a     |
| Outcome data             | 15* | Report numbers of outcome events or summary measures                                                                                                                                                         | 12-13   |
| Main results             | 16  | (a) Give unadjusted estimates and, if applicable, confounder-adjusted estimates and their precision (eg, 95% confidence interval). Make clear which confounders were adjusted for and why they were included | Tab 2-3 |
|                          |     | (b) Report category boundaries when continuous variables were categorized                                                                                                                                    | 12-13   |
|                          |     | (c) If relevant, consider translating estimates of relative risk into absolute risk for a meaningful time period                                                                                             | n/a     |
| Other analyses           | 17  | Report other analyses done—eg analyses of subgroups and interactions, and sensitivity analyses                                                                                                               | n/a     |
| <b>Discussion</b>        |     |                                                                                                                                                                                                              |         |
| Key results              | 18  | Summarise key results with reference to study objectives                                                                                                                                                     | 2       |
| Limitations              | 19  | Discuss limitations of the study, taking into account sources of potential bias or imprecision. Discuss both direction and magnitude of any potential bias                                                   | 13-15   |
| Interpretation           | 20  | Give a cautious overall interpretation of results considering objectives, limitations, multiplicity of analyses, results from similar studies, and other relevant evidence                                   | 14      |
| Generalisability         | 21  | Discuss the generalisability (external validity) of the study results                                                                                                                                        | 14-15   |
| <b>Other information</b> |     |                                                                                                                                                                                                              |         |
| Funding                  | 22  | Give the source of funding and the role of the funders for the present study and, if applicable, for the original study on which the present article is based                                                | 1       |

\*Give information separately for cases and controls in case-control studies and, if applicable, for exposed and unexposed groups in cohort and cross-sectional studies.

**Note:** An Explanation and Elaboration article discusses each checklist item and gives methodological background and published examples of transparent reporting. The STROBE checklist is best used in conjunction with this article (freely available on the Web sites of PLoS Medicine at <http://www.plosmedicine.org/>, Annals of Internal Medicine at <http://www.annals.org/>, and Epidemiology at <http://www.epidem.com/>). Information on the STROBE Initiative is available at [www.strobe-statement.org](http://www.strobe-statement.org).

1  
2  
3  
4  
5  
6  
7 1 **Association of work-related stress with depression symptoms in a special police force. A cross-**  
8 **sectional study.**

Formatted: Line spacing: Double

Formatted: Italian (Italy)

Formatted: Space After: 0 pt, Line spacing: Double

Formatted: Line spacing: Double

9 2  
10 3  
11 4  
12 5  
13 6  
14 7  
15 8 **Sergio Garbarino <sup>1,2</sup>, Giovanni Cuomo <sup>2</sup>, Carlo Chiorri <sup>3</sup>; Nicola Magnavita <sup>4</sup>.**

- 16 9  
17 10  
18 11  
19 12  
20 13  
21 14  
22 15  
23 16  
24 17  
25 18  
26 19  
27 20  
28 21  
29 22  
30 23  
31 24  
32 25  
33 26  
34 27  
35 28  
36 29  
37 30  
38 31  
39 32  
40 33  
41 34  
42 35  
43 36  
44 37  
45 38  
46 39  
47 40  
48 41  
49 42  
50 43  
51 44  
52 45  
53 46  
54 47  
55 48  
56 49  
57 50  
58 51  
59 52  
60 53
1. State Police Health Service Department, Ministry of the Interior, Rome, Italy
  2. Department of Neuroscience, Ophthalmology and Genetics, University of Genoa, Genoa, Italy
  3. Department of Educational Sciences, Psychology Unit, University of Genoa, Genoa, Italy
  4. Department of Public Health, Occupational Health Unit, Università Cattolica del Sacro Cuore, Largo Gemelli 8, 00168 Roma, Italy. e-mail: [nicolamagnavita@gmail.com](mailto:nicolamagnavita@gmail.com)

Correspondence to: N. Magnavita. Tel. +39-347-3300367, Fax: +39-06-61909399, e-mail [nicolamagnavita@gmail.com](mailto:nicolamagnavita@gmail.com);  
[nmagnavita@rm.unicatt.it](mailto:nmagnavita@rm.unicatt.it)

54 **Type of contribution: Original**

55 **Running title: Stress and depression in police**

56 Word count: [4475 words](#)

57 Abstract, word count: [178](#)

58 Tables: 3

1  
2  
3  
4  
5  
6  
7 28 | Figures: 0  
8  
9 29  
10  
11 30 | Funding: This research received no specific grant from any funding agency in the public,  
12  
13 31 | commercial or not-for-profit sectors.  
14  
15 32  
16 33 | Competing interest: none declared. A complete declaration on competing interest will be signed by  
17  
18 34 | all authors before the publication of the paper.  
19  
20 35  
21 36 | Author's contribution: GS-SG carried out medical examinations on workers, CC administered the  
22  
23 37 | psychological tests ~~carried out the statistical analyses and drafted the work~~ and revised statistics,  
24  
25 38 | MNNM ~~developed~~ carried out the statistical analyses and drafted the work, CG-GC revised the  
26  
27 39 | work.  
28  
29 40  
30  
31 41 | Data sharing statement: Technical appendix, statistical code, and dataset available from the  
32  
33 42 | corresponding author at Dryad repository, who will provide a permanent, citable and open access  
34  
35 43 | home for the dataset.  
36  
37 44  
38  
39  
40  
41  
42  
43  
44  
45  
46  
47  
48  
49  
50  
51  
52  
53  
54  
55  
56  
57  
58  
59  
60

**Abstract** (max. 300 words)

**Objectives.** Law and order enforcement may expose police ~~officersmen~~ to significant psychosocial risk factors, so that some ~~subjects of them~~ may find themselves in conditions of distress. The aim of this work is to ~~study-investigate~~ the relationship between job stress and the presence of symptoms of ~~bad mental healthdepression and other psychological problems~~ ~~depression and to assess the risk of mental disorders~~ in police ~~officersmen~~.

**Method:** 292 out of 294 components of the Genoa ~~“Mobile”~~, a special police force engaged exclusively in the enforcement of law and order, responded to our invitation to complete a questionnaire for the assessment of work-related stress, ~~using the demand-control-support (DCS) and the effort-reward-imbalance (ERI) models, and for a screening of mental disorders, including depression (Beck Depression Inventory, BDI), anxiety (State-Trait Anxiety Inventory-Trait, STAI-T), and burnout (Maslach Burnout Inventory, MBI). One response was incomplete. Since only two officers were female, gender differences could not be assessed and were therefore excluded from the analyses. Hence the final group of participants comprised 289 officers.~~

**Results:** Psychological screening showed no case of possible anxiety or burnout, and 21 (7.3%) ~~likely cases of mild depression (BDI >10) among the policemen. Lower reward significantly predicted higher depressive symptomatology, and~~ ~~Policemen~~ ~~They who~~ ~~officers that~~ experienced a discrepancy between work effort and rewards showed a marked increase in the risk of self-reported depression (OR 7.00 95% CI 4.76 to 10.30) when compared with their counterparts who ~~did~~ not ~~undergo “distress”~~ ~~perceived themselves in a condition of distress.~~

**Conclusions:** The prevalence of depressive symptoms in the observed population of police ~~officersmen~~ was low, but not negligible. ~~Given the delicate tasks that special police officers have to accomplish and that an impaired psychological functioning can increase the possibility of errors and the risk to the health and safety of others, the results of this study suggest~~ ~~It would be in the~~

Formatted: Space Before: 0 pt



1  
2  
3  
4  
5  
6  
7 69 | ~~interests not only of the workers themselves, but also of the general population~~ to take steps to  
8  
9 70 | prevent distress and improve the mental well-being of the police.  
10  
11 71 |  
12  
13 72 |  
14  
15 73 | **Keywords:** effort-reward imbalance, depression, distress, job strain, mental health, over-  
16  
17 74 | commitment, police, social support, work-related stress.  
18  
19 75 |  
20  
21  
22  
23  
24  
25  
26  
27  
28  
29  
30  
31  
32  
33  
34  
35  
36  
37  
38  
39  
40  
41  
42  
43  
44  
45  
46  
47  
48  
49  
50  
51  
52  
53  
54  
55  
56  
57  
58  
59  
60

1  
2  
3  
4  
5  
6  
7 76 **Article summary**

8  
9 77 *"Article focus"*

10  
11 78 (up to three bullet points on the research questions or hypotheses addressed)

12  
13 79 Mental health in the special police forces is a critical issue. ~~The policemen~~ Police officers are  
14  
15 80 exposed to acute and chronic stress and may become depressed. The impairment of ~~the police~~  
16  
17 81 ~~officer~~ officers' psychological functioning can be a serious threat to the safety of the public.

18  
19  
20 83 *"Key messages"*

21  
22 84 (up to three bullet points showing the key messages or significance of the study)

23  
24 85 The prevalence of depression in the police special forces is lower than that of the general population  
25  
26 86 and other groups of police ~~officersmen~~. Although prevalence rates were low, a positive association  
27  
28 87 between distress (or job stress) and depressive symptoms was found. ~~Even in special forces, the~~  
29  
30 88 distress is associated with depression. The prevention of distress and the treatment of depressive  
31  
32 89 disorders among police ~~officersmen~~ are necessary for the safety of the workers and the public.

33  
34  
35 91 *"Strengths and limitations of this study"*

36  
37 92 This is the first study to investigate the association of "job distress" with depressive  
38  
39 93 symptomatology in a special force police unit and had a higher participation rate. ~~This-It~~ is a cross-  
40  
41 94 sectional study, conducted on a relatively small cohort and with only self-report measures. ~~It is the~~  
42  
43 95 first study in Italy and one of the few in the world on first responder policemen, and had a high  
44  
45 96 participation. ~~It 'was, however, obtained a very high participation in a group of policemen always in~~  
46  
47 97 the front line, in the maintenance of public order.

## Introduction

~~Referee's opinions: [The flow and writing style of the first paragraphs could be improved. Also, this section contains several instances of uneven writing/awkward formulations] [Since not all police officers are male, a more gender neutral wording would be appropriate throughout the document.]~~

Formatted: Font: Italic

It is generally agreed that mental health disorders have a multifactorial etiology and in the last decades research has focused on the role of working conditions in determining people's mental health. The impairment of the mental health of workers is an increasingly frequent consequence of contemporary working conditions [Cherry et al. 2006, Melchior et al. 2007], also because the workers themselves often report that their work affect their health (X). Direct financial costs due to absenteeism, presenteeism, reduced productivity and compensation are being added to the intangible costs arising from the suffering of workers. Alongside the ethical reasons for action, there are also important economic considerations that point to/indicate/indicate the need for preventing mental health conditions/depression. Skilled workers with qualifications acquired through expensive training and long experience are the most important asset of any company, i.e., their human capital. The premature loss of these workers through due to psychological trauma/problems or illness is an economic as well as a human drama.

Comment [DiSA1]: Paoli P, Merlié D. European Foundation for the Improvement of Living and Working Conditions—Third European survey on working conditions. Luxemburg: Office for Official Publications of the European Communities; 2000.

~~In the modern society work is not just a way to earn money, but also a crucial element of the social status of an individual and a source of meaning in her/his life. This often leads to a very high level of commitment and identification with one's work and organization, and this is especially true for high level professionals, such as police officers operating in special force units employed in law enforcement and riot control. It is generally thought that this category of workers is particularly at risk for the exposure to violent traumas, and hence to posttraumatic stress disorder, since they are frequently exposed to violent events, but in fact traumatic accidents of this type rarely occur, whereas it tends to be overlooked the long term effect of such exposure, that, even if not immediately perceived as detrimental, can still induce maladaptive reactions<sup>3</sup>. Although it has~~

6

1  
2  
3  
4  
5  
6  
7 124 ~~been shown that police officers are more resilient to stress than civilians [Yuan et al. 2011, Evans et~~  
8  
9 125 ~~al 2013, Galatzer-Levy et al. 2013, Garbarino et al. 2012], several cross-sectional studies have~~  
10  
11 126 ~~provided evidence that adverse work conditions are related to poor mental health outcomes (e.g.,~~  
12  
13 127 ~~XX). Some workers, particularly those employed in first responder organizations such as the police~~  
14  
15 128 ~~force, are particularly vulnerable exposed to psychosocial stress factors. It is known that violent~~  
16  
17 129 ~~trauma can acutely induce posttraumatic stress disorder (PTSD) in workers<sup>1)</sup>. Accidents of this type~~  
18  
19 130 ~~rarely occur, as policemen are probably more resilient to stress than civilians [Yuan et al. 2011,~~  
20  
21 131 ~~Evans et al 2013, Galatzer-Levy et al. 2013, Garbarino et al. 2012], and the likelihood that a police~~  
22  
23 132 ~~officer may be exposed to an event severe enough to cause PTSD tends to be low<sup>2)</sup>. Nevertheless,~~  
24  
25 133 ~~officers are frequently exposed to violent events that, even if not immediately perceived as~~  
26  
27 134 ~~detrimental, can still induce maladaptive reactions in individuals<sup>3)</sup>. In addition to these operational~~  
28  
29 135 ~~work-related challenges, police officersmen may be subject exposed to organizational problems that~~  
30  
31 136 ~~are common within hierarchical, male-dominated paramilitary structures such as the fire-fighting,~~  
32  
33 137 ~~ambulance and paramedic services<sup>4)</sup> Violanti 2011. Daily organizational stressors may be more~~  
34  
35 138 ~~challenging than operational experiences, as we have observed in a shown by a previous recent~~  
36  
37 139 ~~study in which the that reported that levels of perceived stress in a group of police officers,~~  
38  
39 140 ~~somewhat ironically, men were as higher during routine jobs than during a high-risk public event<sup>5)</sup>.~~

40  
41 141 ~~It is important to note that the pathophysiological reaction may be the same for completely~~  
42  
43 142 ~~different stimuli. Even if the “more recent” and advanced area of our brain (i.e. the medial frontal~~  
44  
45 143 ~~eorx) is perfectly able to distinguish between the dramatic operational events and the chronic~~  
46  
47 144 ~~organizational factors, the part of the brain that is responsible for/involved in neurophysiological~~  
48  
49 145 ~~response to stress, i.e. the limbic system, makes no such distinction. Consequently, Bboth a~~  
50  
51 146 ~~dramatic violent event and a repeated and prolonged series of administrative events can cause an~~  
52  
53 147 ~~allostatic load, i.e., a neurobiological maladaptive reaction due to the adaptation to challenging~~  
54  
55 148 ~~environments characterized by behavioral and; emotional and capacity changes that goes under the~~

**Comment [DiSA2]:** Se mettiamo "police officers" evitiamo la questione del genere

**Comment [DiSA3]:** Sanne B, Mykletun A, Dahl A, Moen B, Tell G. Testing the job Demand-Control-Support model with anxiety and depression as outcomes: The Hordaland Health Study. *Occup Med (Lond)*. 2005;55:463–73.

**Comment [DiSA4]:** Se mettiamo "police officers" evitiamo la questione del genere

**Formatted:** Indent: First line: 0.49"

1  
2  
3  
4  
5  
6  
7 149 ~~name of known as "distress" (Mc Ewen). Through the Distress,~~ interacting with many different  
8  
9 150 individual factors, distress can induce the occurrence of mental ~~disorders~~ illnesses such as anxiety,  
10  
11 151 depression, burnout, conversion disorder and other conditions classified in DSM IV (Cooper).

12  
13 152 Psychological ~~injury~~ dysfunctioning resulting from ~~work experience~~ job distress can be a  
14  
15 153 gradual and progressive process that ~~erodes~~ impairs well-being over time. This gradual evolution  
16  
17 154 often leaves the worker unaware of the problem, or unwilling to acknowledge its importance, at  
18  
19 155 least until the severity of the ~~symptoms~~ disease makes it clear to colleagues, family, or both. The  
20  
21 156 ~~recognition of emotional problems due to work-related distress in the prevailing culture in the the~~  
22  
23 157 ~~police force~~ law enforcement context is rarely, if ever, ~~does not~~ encouraged, ~~since recognition of~~  
24  
25 158 ~~emotional damage caused by work, as~~ it is considered a sign of weakness <sup>6</sup>. Consequently,  
26  
27 159 ~~officers~~ people fail to seek professional help early enough to prevent ~~until the disease is so far~~  
28  
29 160 ~~advanced that it is~~ diagnosis and gain a fast benefit from treatment, ~~difficult to treat~~. It is for this  
30  
31 161 reason that mental ~~illness disorders are~~ the leading cause of retirement in the police force <sup>7</sup>.

32 162 The two leading models that have been used to describe and explain individual perception of  
33  
34 163 stress factors are the Demand/Control/Support (DCS) model, developed by Karasek <sup>8</sup>, and the  
35  
36 164 Effort/Reward Imbalance (ERI) model, developed by Siegrist <sup>9</sup>. The DCS model assumes that the  
37  
38 165 primary sources of job stress, or "job strain", stem from two basic characteristics of the job itself:  
39  
40 166 "job demand" and "job control". The model predicts that job strain is not simply a function of  
41  
42 167 job demand, but also depends on the amount of control the worker has over the work. Job demand  
43  
44 168 takes into consideration the pace and intensity of work: work overload, degree of difficulty,  
45  
46 169 available time, time allotted to executing tasks and the existence of contradictory or conflicting  
47  
48 170 orders. Job decision latitude, or job control, ~~depends upon~~ refers to the worker's ability to control  
49  
50 171 his own activities and skill usage. Social support at work, a moderating factor of job strain, was  
51  
52 172 subsequently included in the model. According to this model, high psychological demands in  
53  
54 173 combination with low decision latitude can contribute to the development of psychological

Comment [DiSA5]: Attenzione che l'anno di questa reference non è 2006 ma 1998.

1  
2  
3  
4  
5  
6  
7 174 problems, and the workers with high job strain and low social support at work are supposed to be  
8  
9 175 the most vulnerable to negative health effects (the so-called "isolated strain", or "isostrain",  
10  
11 176 hypothesis).

12  
13 177 -The ERI model puts emphasis more on the reward rather than on the control structure of  
14  
15 178 work, suggesting that mental distress and its health correlates arise when a high degree of effort is  
16  
17 179 not adequately rewarded in the form of pay, esteem, status consistency or career opportunities. A  
18  
19 180 further assumption of this model involves individual differences in the perception of effort-reward  
20  
21 181 imbalance: people with a motivational pattern of excessive work-related commitment and high need  
22  
23 182 for approval (over-commitment) are at increased risk of strain, and, consequently, health problems  
24  
25 183 <sup>9)</sup>. The Karasek model (DCS), developed in the 1960s, appears to be more suitable for the physical  
26  
27 184 aspects of occupational stress, while Siegrist's model (ERI), designed for the tertiary society of the  
28  
29 185 1980s, is more sensitive to stress arising from work relations and organizational factors <sup>10)</sup>.

30 186 Unfortunately, in literature there is no unique definition of "distress" is an ill-defined,  
31  
32 187 although there is some consensus in term considering it as that refers to an unfavorable and  
33  
34 188 unpleasant response to stress. Due to such a vague definition, the prevalence of workers with  
35  
36 189 distress in published studies with distress can range ranges widely from 5% to 50% in various  
37  
38 190 studies<sup>11)</sup> Marchand, van Rhenen. When distress reaches clinical relevance it is defined as "stress-related  
39  
40 191 disorder"<sup>12)</sup>; This term includes a variety of clinical conditions, including depression, which are  
41  
42 192 collectively labeled as "common mental disorders" (CMD) [Van der Klink & Van Dijk, 2003].  
43  
44 193 The prevalence of CMDs in the US armed forces is 27%<sup>12)</sup> and there is a similar prevalence in the  
45  
46 194 UK armed forces<sup>13)</sup> Jones). Depression is the most common diagnosis<sup>13)</sup> Iversen 2004). A systematic  
47  
48 195 review of evidence on psychosocial factors at work and depression, however, showed a high degree  
49  
50 196 of study heterogeneity (Bonde 2006), although other studies found moderate evidence for a relation  
51  
52 197 between the psychological demands of the job and the development of depression, with relative  
53  
54 198 risks of approximately 2.0 (XX). The prevalence of CMDs in the US armed forces is 27%<sup>12)</sup> and

Formatted: Indent: First line: 0.49"

Comment [DiSA6]: Bo Netterström, Nicole Conrad, Per Bech, Per Fink, Ole Olsen, Reiner Rugulies, and Stephen Stansfeld  
**The Relation between Work-related Psychosocial Factors and the Development of Depression**  
Epidemiol Rev (2008) 30(1): 118-132 first published online June 27, 2008 doi:10.1093/epirev/mxn004

9

1  
2  
3  
4  
5  
6  
7 199 there is a similar prevalence in the UK armed forces<sup>13, Jones</sup>. Distress and mental health problems  
8  
9 200 caused by work can affect performance of professional activity, especially in a delicate area such as  
10  
11 201 law enforcement, in which workers have weapons. The mental health-related consequences of stress  
12  
13 202 in police officers can thus be particularly serious not only for the increased risk of their individual  
14  
15 203 health problems, and but also for the increased risk of impaired work performance that could  
16  
17 204 jeopardize the safety and health of the general population. One of the most common diagnoses is  
18 205 depression<sup>Iversen et al. 2009</sup>, and as reported by Violanti (X), depression can be a contributing factor  
19  
20 206 not only in early retirement, but also in police officer's suicides, murder-suicides, domestic  
21  
22 207 violence, unnecessary violence and aggression while in service, over and above the role played by  
23  
24 208 the police culture that might encourage aggressive and authoritarian attitudes.

**Comment [DiSA7]:** Violanti, J. M. (2007). Police Suicide: Epidemic in Blue, 2nd ed., Springfield, IL: Charles C Thomas Publisher

25  
26 209 ~~In Europe it is estimated that the lifetime prevalence of mood disorders is 14.0% and the~~  
27  
28 210 ~~one year prevalence is 4.2%.<sup>14)</sup> Outside Europe, the prevalence of severe distress with symptoms of~~  
29  
30 211 ~~depression or other mental problems is estimated to be at least 5%, but could be significantly higher~~  
31  
32 212 ~~Hilton, Fan, Huang<sup>15)</sup>. A systematic review of evidence on psychosocial factors at work and~~  
33  
34 213 ~~depression, however, showed a high degree of study heterogeneity (Bonde 2006). Distress and~~  
35  
36 214 ~~mental health problems caused by work are very important for the performance of professional~~  
37  
38 215 ~~activity, especially in a very sensitive area such as the police force, in which workers have weapons.~~  
39  
40 216 ~~The consequences of stress in police officers can be particularly serious both on account of the~~  
41  
42 217 ~~increased risk of individual health problems, and also the increased risk of impaired work~~  
43  
44 218 ~~performance that could jeopardize the safety and health of the general population.~~

**Formatted:** Justified, Indent: First line: 0.49"

45 219 The relationship between mental health and the work environment is complex and  
46  
47 220 multifaceted: an unfavorable work environment is associated with higher prevalence of mental  
48  
49 221 disorders, and employees with mental problems are generally less adaptable to their work  
50  
51 222 environment.

**Formatted:** Indent: First line: 0.49"

1  
2  
3  
4  
5  
6  
7 223 ~~The diagnosis of work related mental disorders is of particular importance for three reasons:~~  
8  
9 224 ~~At the macro (national) level, epidemiological monitoring can identify trends and help to indicate~~  
10  
11 225 ~~preventive strategies. In Italy, for example, it is compulsory for all employers to assess stress in the~~  
12  
13 226 ~~workplace and to provide appropriate preventive measures if necessary. At intermediate (company)~~  
14  
15 227 ~~level, the identification of one or more cases of work related mental disorders can stimulate or~~  
16  
17 228 ~~enhance preventive action. At the individual level, the occupational physician may give specific~~  
18  
19 229 ~~instructions to encourage the return to work or improve the quality of working life.~~

**Comment [DiSA8]:** Questo paragrafo qui è necessario? Forse possiamo spostarlo nella discussione

**Formatted:** Indent: First line: 0.49"

20 230 ~~Sadly, investigating stress in police officers is particularly difficult because the latter are~~  
21  
22 231 ~~afraid of being identified as individuals who have been compromised by stress. They fear that this~~  
23  
24 232 ~~might then cause them to be discriminated against in their careers, removed from active duties and~~  
25  
26 233 ~~relegated to office work. On the other hand, a study by Summerfield<sup>7)</sup> found work stress to be the~~  
27  
28 234 ~~first cause of sickness absence and reduction in operational duties, as well as the leading cause of ill~~  
29  
30 235 ~~health retirement in police officersmen. A number of studies have previously evaluated~~  
31  
32 236 ~~occupational stress in policemen using the DCS and ERI models. Job strain and effort/reward~~  
33  
34 237 ~~imbalance were associated with cardiovascular risk in policewomen<sup>16)</sup>, musculoskeletal disorders~~  
35  
36 238 ~~in special police forces<sup>17)</sup>, lower mental health level in correctional police officers<sup>18)</sup> and urban~~  
37  
38 239 ~~police officers<sup>19)</sup>. The demand control model proved to be a valid theoretical framework to explain~~  
39  
40 240 ~~Previous studies on police officers have demonstrated that the demand control model is a~~  
41  
42 241 ~~significant predictor of professional efficiency and exhaustion<sup>20)</sup>, and that there is a complex~~  
43  
44 242 ~~interplay between job demands, emotional exhaustion and other social and individual factors<sup>21)</sup>.~~  
45  
46 243 ~~Subjects Officers with greater perceived work stress in the first year of police service have showed~~  
47  
48 244 ~~greater more severe depression symptoms 12 months later<sup>22)</sup>.~~

49 245 The ~~purpose aim~~ of this study was to ~~assess whether there is an investigate, apparently for~~  
50  
51 246 ~~the first time, the~~ association ~~between of~~ a condition of "distress" and the presence of self-reported  
52  
53 247 symptoms of depression, ~~alongside with other common work-related mental problems such as~~



1  
2  
3  
4  
5  
6  
7 248 ~~anxiety and burnout takes as a control, or other common mental disorders,~~ in a specialist or "elite"  
8  
9 249 unit of the Italian police, the "VI Reparto Mobile" of Genoa, a carefully selected group who is  
10  
11 250 called to maintain law and order in all the major events that ~~happen take place~~ in the country. The  
12  
13 251 police ~~officersmen~~ in this group work exclusively as First Responders; ~~members~~ are carefully  
14  
15 252 selected among ordinary officers and receive specific psychophysical and tactical training. Their  
16  
17 253 routine work involves ensuring order during sporting events, crowds and parades, natural and social  
18  
19 254 emergencies, and also they are often involved in public events in which there is a high risk of  
20  
21 255 terrorist attacks and physical fights. During a single riot, they are on duty for an average of 10 or  
22  
23 256 more hours of work, have physical fights for over an hour on average and often feel that they are in  
24  
25 257 imminent danger of death. They have a special and continuing education which aims to improve  
26  
27 258 team spirit ("~~esprit de corp~~") and increase the preparation to dramatic events. The decision to hold  
28  
29 259 the 2009 G8 meeting in Italy provided the opportunity for carrying out our present study. The police  
30  
31 260 officers selected to ensure law and order during this event were asked to undergo a thorough  
32  
33 261 examination of their mental health condition so that their conduct during the meeting could not be  
34  
35 262 stigmatized.

## 39 265 **Method**

### 43 267 *Participants*

45 268 [This study refers to the initial phase of a study started on the eve of the G8 meeting in 2009.](#) The  
46  
47 269 Italian special police force unit "VI Reparto Mobile" of Genoa is composed of 294 members. Two  
48  
49 270 ~~policemen-officers~~ refused to take part in the study and one was unable to complete all the tests in  
50  
51 271 the battery described in the next section and was therefore excluded. The participation rate was  
52  
53 272 99%. Since only two officers were female, gender differences could not be assessed and ~~they~~ were

therefore excluded from the analyses. Hence, the final group of participants comprised 289 officers (see Table 1 below for descriptive statistics of the socio-demographic and work-related variables).

Insert Table 1 about here

Formatted: Centered, Border: Top: (Single solid line, Auto, 0.5 pt Line width), Bottom: (Single solid line, Auto, 0.5 pt Line width)

Occupational stress was measured on three separate occasions: (i) in January 2009, when the police officers were engaged only in routine work; (ii) in April 2009, when they were subjected to ~~underwent~~ specific training in preparation for the meeting, and (iii) in July 2009, shortly before the Genoa G8 summit meeting took place. Following the procedure already adopted in previous work [favori su assenze: personalita], we have integrated averaged all the three measurements into a single value, so as to have the level of stress that each officer had received experienced during the period.

Formatted: Highlight

Occupational stress was ~~measured~~ assessed using the validated Italian versions<sup>23)</sup> of two standardized questionnaires: the ~~DCS Demand-Control-Support~~ (DCS) questionnaire, derived from the longer Job Content Questionnaire<sup>8)</sup>, and the ~~Effort-Reward Imbalance~~ (ERI) questionnaire<sup>9)</sup>. ~~DCS is a 17-item self-report questionnaire that provides scores in three scales: The~~

Formatted: Font: Italic

~~classic 17-item DCS questionnaire consisted of 3 scales termed: Psychological Job Demand<sup>2</sup>, (Demand, 5 items mapping quantitative aspects of work, such as time, requirement and speed to perform tasks, and conflict among different demands), Job Control/Decision Latitude (Control, 6 items mapping use and development of abilities and autonomy to make decisions about the work process) and Workplace Social Support (Support, 6 items mapping relationships between coworkers and superiors). Participants are asked to rate each item on a 4-point frequency (Demand and Control) or agreement (Support) scale. In this study reliabilities (Cronbach's alphas) of the scales were .71, .65 and .84, respectively. Along with scale sum scores, a further index, "perceived job strain" (DCS-Job Strain) was computed by dividing the mean item score of Demand by the mean item score of the Control scale. A ratio of 1 indicates a balance between demand and control; values >1 indicate excessive perceived job strain [XX]. ERI is a 23-item self-report questionnaire that~~

Formatted: Font: Italic

Comment [DISA9]: Courvoisier DS, Perneger TV. Validation of alternative formulations of job strain. J Occup Health 2010;52:5-13.

1  
2  
3  
4  
5  
6  
7 298 assesses three dimensions: *Effort* (6 items mapping the demanding aspects of the work  
8  
9 299 environment), *Reward* (11 items mapping the occupational rewards that are supposed to be received  
10  
11 300 by the person) and *Overcommitment* (6 items mapping the intrinsic personal factors regarding  
12  
13 301 occupational motivation and participation that enhance the effects of stress). Participants are asked  
14  
15 302 to rate each item on a 5-point intensity scale. In this study reliabilities of the scales were .82, .89  
16  
17 303 and .79, respectively. Along with scale sum scores, the weighted ratio between effort and reward  
18  
19 304 (E/R Ratio) was computed to quantify the degree of mismatch between effort and reward. Values  
20  
21 305 >1 reflect an imbalance that can induce stress [XX].

**Comment [DISA10]:** uniper B, White N, Bellamy P. A new approach to evaluating the well-being of police. *Occup Med (Lond)* 2010;60:560-565.

22 306 'job control or decision latitude' and 'workplace social support'. The 'demand' scale was the sum  
23  
24 307 of 5 items (e.g. D1: "Do you have to work very fast in your job?") ( $\alpha = 0.71$ ), the 'control' scale  
25  
26 308 was the sum of 6 items (e.g. C1: "Do you have the opportunity to learn new things in your work?")  
27  
28 309 ( $\alpha = 0.65$ ), and the 'support' scale was the sum of 6 items (e.g. S1: "There is a calm and pleasant  
29  
30 310 atmosphere where I work") ( $\alpha = 0.84$ ). Items were scored using a 4 point Likert scale in which the  
31  
32 311 first two scales were graded from 1=never to 4=often, while the third scale (support) was graded  
33  
34 312 from 1=strong disagreement to 4=strong agreement. We followed the commonest method of  
35  
36 313 obtaining a continuous variable, termed "perceived job strain", and divided demand by control  
37  
38 314 (weighted by item numbers).

39 315 The 23-item ERI questionnaire contained two scales: 'effort', evaluated by 6 items (e.g. E1 "I have  
40  
41 316 constant time pressure due to a heavy workload") ( $\alpha = 0.82$ ), and 'reward', evaluated by 11 items  
42  
43 317 (e.g. R1 "I receive the respect I deserve from my superior or equivalent person") ( $\alpha = 0.89$ ). Both  
44  
45 318 were scored on a 5-point scale, where a value of 1 indicated no stressful experience and 5 indicated  
46  
47 319 a highly stressful experience. The weighted ratio between effort and reward was calculated to  
48  
49 320 quantify the degree of mismatch between effort and reward. Individuals who had a score greater than  
50  
51 321 one were considered to be stressed because they subjectively perceived a discrepancy between efforts and  
52  
53 322 results. The ERI questionnaire also included a third scale, 'over-commitment' which was evaluated

1  
2  
3  
4  
5  
6  
7 323 by 6 items on a 4 point Likert scale (e.g. O3 “When I get home, I can easily relax and ‘switch off’  
8  
9 324 work”) ( $\alpha = 0.79$ ). It measured the set of intrinsic personal factors regarding occupational  
10  
11 325 motivation and participation that enhance the effects of stress.  
12  
13 326 The mental health status was assessed at baseline after the third occasion using three measures:  
14  
15 327 depression, anxiety and burnout the following measures.  
16  
17 328 Depression was evaluated by the Beck Depression Inventory (BDI) <sup>24</sup>, as this questionnaire  
18  
19 329 performed better than other tests for depression screening <sup>25,26</sup>. The BDI consists of 21 groups of 4  
20 330 alternative self-evaluation statements used to assess the presence and severity of the affective,  
21  
22 331 cognitive, motivational, psychomotor, and vegetative components of depression, with higher scores  
23  
24 332 indicating more severe depression. If multiple responses are chosen under one item, the most  
25  
26 333 symptomatic item is scored. Statement choices are scored from 0 (absent) to 3 (severe) and can total  
27  
28 334 from 0 to 63. In this study internal consistency was 0.81. The cut-off score commonly used in  
29  
30 335 clinical practice for depression screening is 10 <sup>27</sup>. The probability of suffering major depressive  
31  
32 336 disorder rapidly increases above this threshold; so, a higher score of 14 <sup>25</sup> or 16 <sup>26</sup> is often chosen  
33  
34 337 in order to reduce the prevalence of false positive in populations consisting of patients affected by  
35  
36 338 chronic diseases with poor or severe prognosis. In this study, we adopted the classical cut-off level  
37 339 of 10, as the subjects tested were young, active and highly selected.

38  
39 340  
40  
41 341 Anxiety was evaluated by the State-Trait Anxiety Inventory–Trait (STAI-T; Spielberger et  
42  
43 342 al. 1983; Italian version in Sanavio et al. 1997) The STAI-T is a 20-item self-report measure of  
44  
45 343 anxiety proneness requiring participants to rate their frequency of anxiety symptoms on a 4-point  
46  
47 344 Likert-type frequency scale ranging from 1 (almost never) to 4 (almost always). Nine items are  
48  
49 345 reverse scored. In this study internal consistency the reliability of the scale was .74.

50  
51 346 Maslach Burnout Inventory (MBI; Maslach and Jackson 1981; Italian version in Sirigatti  
52 347 and Stefanile 1993) MBI is a 22-item self-report measure of professional burnout. It provides scores

15

Formatted: Indent: First line: 0.49"

Formatted: Font: Times New Roman, 12 pt

1  
2  
3  
4  
5  
6  
7 348 on three facets of burnout: Emotional Professional Exhaustion (EE; 9 items mapping), which

Formatted: Font: Times New Roman, 12 pt

8  
9 349 assesses feelings of being emotionally overextended and exhausted by one's work;

10  
11 350 Depersonalization (DP; 5 items), which assesses mappings an unfeeling and impersonal response

12  
13 351 towards the recipients of one's care) and Personal Accomplishment (PA; 8 items), which

Formatted: Font: Times New Roman, 12 pt

14  
15 352 evaluates mapping -feelings of competence and successful achievement in one's work with people);

16  
17 353 Participants are asked to rate the frequency of experiencing feelings related to each subscale using a

18  
19 354 7-point, Likert-type scale (1 = Never; 7 = Every Day). In this study reliabilities of the scales were

20  
21 355 internal consistencies were EE 0.86, DP 0.60 and PA 0.80, respectively.

Formatted: Font: Times New Roman, 12 pt

22  
23 356 The questionnaires were anonymous. All participants were tested anonymously and confidentially

24  
25 357 during their routine psychophysical assessment. Anonymity was achieved, and participants by

26  
27 358 identifying were identified by participants with an alphanumeric code, double-blind. The study

28  
29 359 protocol was approved by the Ethics Committee of the Catholic University Rome School of

30  
31 360 Medicine, the Institute of Occupational Medicine, responsible for co-coordinating the study, and the

32  
33 361 National Police Management Board and All data was treated in accordance the whole procedure

34  
35 362 followed the with the Ethical Principles of Psychologists Code of Conduct (American

36  
37 363 Psychological Association 2002).

### 38 39 365 *Control Variables*

40  
41 366 The control variables used in our study were: age (years), length of employment (years of service);

42  
43 367 education level (~~8 or more years of schooling~~ lower vs equal/higher than high school); rank (officer

44  
45 368 ~~vs; or~~ supervisor/~~and~~ technical staff); origin (Northern or Southern Italy); housing (in barracks or

46  
47 369 home); marital status (single/~~or~~ divorced/~~married~~ vs married/~~or~~ cohabiting); presence of children

48  
49 370 (no/yes).

### 50 51 371 *Statistical analyses*

1  
2  
3  
4  
5  
6  
7 373 The first research question we ~~set out to answer~~addressed was whether there was a relationship  
8  
9 374 between the individual level of work-related stress and mental health problems. In order to do this  
10  
11 375 we used hierarchical multiple linear regression models in which the variable ~~“the BDI~~  
12  
13 376 ~~score depression score”~~ was ~~posed specified~~ as ~~dependent variable criterion~~. In Model 1 ~~the first~~  
14  
15 377 ~~model~~ we ~~used specified as predictors only~~ the ~~socio-demographic control~~ variables (~~age, length of~~  
16  
17 378 ~~employment, rank, education level, origin, marital status, housing, having offspring~~) as independent  
18  
19 379 ~~variables~~. In Model 2 and 3 ~~the second and third models, we separately added the stress related~~  
20 380 ~~variables scale scores~~ from ~~the the Karasek (demand, control, support) DCS~~ and ~~from the the~~  
21  
22 381 ~~Siegrist ERI models (effort, reward, over-commitment) questionnaires, respectively, were entered in~~  
23  
24 382 ~~the regression model. In the final model~~ In Model 4, control variables and DCS and ERI scores  
25  
26 383 ~~were specified as predictors, we put together all the stress related and the socio-demographic~~  
27  
28 384 ~~variables as predictors of depression~~. The degree of association between variables is ~~indicated~~  
29  
30 385 ~~indexed~~ by the regression coefficient computed on the standardized variables ( $\beta$ ). The amount of  
31  
32 386 variance of the depression score accounted for by the predictors (~~and the goodness of fit of the~~  
33  
34 387 ~~regression model~~) ~~was~~ indexed by the ~~adjusted ( $R^2$ )~~. ~~Since age and length of employment were~~  
35 388 ~~highly correlated ( $r = .91$ ), only the latter was used as a predictor. In order to minimize the~~  
36  
37 389 ~~potentially confounding effects of multicollinearity, we partialized the effects through principal~~  
38  
39 390 ~~component analysis~~.

40  
41 391 ~~The second question involved ascertaining~~ We then tested ~~what was~~ the risk of suffering  
42  
43 392 from depression for ~~an policeman-officer~~ in a state of distress. We used binary logistic regression,  
44  
45 393 with ~~caseness for the state of depression (i.e., BDI score  $\geq 10$  (“caseness”)) as defined above as the~~  
46  
47 394 ~~dependent variable. Separately, as criterion we and DCS-Job Strain used job strain (high demand and~~  
48  
49 395 ~~low control), social isolation (“support” DCS-Support score below the median), isostrain (job strain~~  
50  
51 396 ~~plus social isolation), Effort/Reward imbalance (effort-reward imbalance (subjects with E/R ratio~~  
52  
53 397 ~~ERI value  $> 1$ ), and Over-Involve in work (ERI-“over-commitment” Overcommitment score~~

Formatted: Font: Italic

Formatted: Font: Italic

Formatted: Indent: First line: 0.49"

Comment [DISA11]: Questo non ho capito come lo calcoliamo

1  
2  
3  
4  
5  
6  
7 398 above the median) as ~~independent variables~~predictors. The resulting values ("raw" or unadjusted)  
8  
9 399 were subsequently corrected by adding the socio-demographic variables to the equation. ~~We~~  
10  
11 400 ~~calculated~~Odds ratios (OR) and their 95% confidence intervals (95%CI) ~~were computed~~.  
12  
13 401 ~~PASW/SPSS software (version 20, IBM, Chicago, IL) was used for analyses.~~

14  
15 402 ~~The study protocol was approved by the Ethics Committee of the Catholic University Rome School~~  
16  
17 403 ~~of Medicine, the Institute of Occupational Medicine, responsible for co-coordinating the study, and~~  
18  
19 404 ~~the National Police Management Board.~~

## 20 405 21 22 406 23 24 407 **Results**

25  
26 408  
27  
28 409 ~~The characteristics of the study population are shown in Table 1. The average values of the~~  
29  
30 410 ~~variables indicating stress in the workplace and those referring to mental disorders are listed in~~  
31  
32 411 ~~Table 2~~Mean scale scores are reported in Table 1. The mean levels of occupational stress scores  
33  
34 412 were not particularly high when compared with those of other groups of Italian workers [Magnavita  
35  
36 413 PsyJ]. The average levels of depression, anxiety, emotional exhaustion and depersonalization scores  
37  
38 414 were close to the lower limits of the respective scales, while those of personal accomplishment were  
39  
40 415 high. Based on the Italian cut-off levels, there was no case of possible anxiety or burnout. In this  
41  
42 416 study~~However~~, there were 21 (7.3%) likely cases of mild depression (BDI ~~≥~~greater than or equal to  
43  
44 417 10) among the policemen and 7 (2.4%); while the most likely cases of moderate depression (BDI ~~≥~~  
45  
46 418 16)~~were found among 7 subjects (2.4%).~~

47 419 ~~Hierarchical multiple linear regression~~ Linear regression analysis (Table 3)~~allowed~~enabled  
48  
49 420 us to ~~evaluate~~test the extent to which the level of depressive symptomatology ~~can~~ that can be  
50  
51 421 predicted on the basis of socio-demographic and work-related stress data (Table 2).

52  
53 422 [Insert Table 2 about here](#)

54  
55  
56  
57  
58  
59  
60

18

Formatted: Indent: First line: 0"

Formatted: Indent: First line: 0.49"

Formatted: Centered, Border: Top: (Single solid line, Auto, 0.5 pt Line width), Bottom: (Single solid line, Auto, 0.5 pt Line width)

1  
2  
3  
4  
5  
6  
7 423 The association between of depression with only socio-demographic variables (Model 1) ~~and~~  
8  
9 424 ~~depression~~ was weak (Adjusted  $R^2 = .01$ ) and ~~and~~ generally not significant, ~~only the rank level was~~  
10  
11 425 ~~inversely associated with depression~~ except a positive association with length of employment, which  
12  
13 426 ~~was significant~~ also in all next models. ~~Taken together, the socio-demographic factors described~~  
14  
15 427 ~~only a small fraction of the variability of psychological problems, i.e. less than 1%~~ When DCS  
16  
17 428 scores were entered into the model (Model 2), a significant increase in Adjusted  $R^2$  (.10) was  
18  
19 429 ~~observed, and DCS-Control and DCS-Support were significantly and negatively associated with~~  
20  
21 430 ~~BDI scores. When DCS scores were replaced by ERI scores (Model 3), the Adjusted  $R^2$~~   
22  
23 431 ~~significantly increased (.16) and the negative regression coefficient of ERI-Reward was the only~~  
24  
25 432 ~~significant effect, along with the one of length of employment. Model 4, that included all control~~  
26  
27 433 ~~and occupational stress variables, did not show an Adjusted  $R^2$  significantly higher than Model 3,~~  
28  
29 434 ~~and the only significant predictors were length of employment and ERI-Reward score.~~

30 435 The results of the logistic regression are shown in Table 3.

31  
32 436 Insert Table 3 about here:

33  
34 437 For officers in a state of "distress" according to the DCS model ( i.e. those with a simultaneous high  
35  
36 438 level of "demand" and low level of "control"), the risk of being depressed approximately doubled,  
37  
38 439 but not significantly, whereas the other categorical predictors were all statistically significant.  
39  
40 440 Notably, officers with an ERI-Effort/Reward ratio higher than 1 had an approximately 7-fold higher  
41  
42 441 risk of depression than the others.

43 442 The results of regression analyses performed using anxiety and MBI scores as criteria are  
44  
45 443 shown in Tables 4a-d.

46  
47 444 Insert Tables 4a-d about here

48  
49 445 Anxiety was significantly associated with living in barracks, with lower scores in DCS-Support and  
50  
51 446 ERI-Reward and with higher scores in ERI-Effort. MBI Professional Exhaustion scores were higher  
52  
53 447 in older officers and in agents and were significantly predicted by higher ERI-Over-commitment

Formatted: Font: Italic

Formatted: Superscript

Formatted: Superscript

Formatted: Indent: First line: 0.49"

Formatted: Centered, Indent: First line: 0.49", Border: Top: (Single solid line, Auto, 0.5 pt Line width), Bottom: (Single solid line, Auto, 0.5 pt Line width)

Formatted: Indent: First line: 0.49"

Formatted: English (U.K.)



1  
2  
3  
4  
5  
6  
7 448 scores. MBI Depersonalization scores were higher in older officers and in officers without children,  
8  
9 449 and were significantly predicted by lower ERI-Reward scores. MBI Personal Accomplishment  
10  
11 450 scores were lower in barracked officers and in officers without children, and were significantly  
12  
13 451 predicted by higher DCS-Control scores.

14  
15 452 By adding demand, control and support, the percentage of variance expressed rose to about ← **Formatted: Indent: First line: 0.49"**  
16  
17 453 one-tenth of the total variance ( $R^2=0.096$ ). Social support was negatively associated with depression  
18 454 ( $\beta=-0.211$ ). Job control was negatively associated with the presence of depressive symptoms ( $\beta=-$   
19  
20 455 0.127).

21  
22 456 By substituting the DCS model variables with those of the ERI model (Model III of Table 3)  
23  
24 457 among the independent variables, the coefficient of determination improved significantly, thus  
25  
26 458 expressing about one-sixth of the total variance ( $R^2=0.16$ ). Reward received for work was the most  
27  
28 459 important protective factor against depression ( $\beta=-0.303$ ). On the contrary, excessive involvement  
29  
30 460 in work or intrinsic effort (over-commitment) was significantly associated with depression in a  
31  
32 461 positive way ( $\beta=0.121$ ).

33  
34 462 The more complex model, in which all stress-related variables were included (Model IV of  
35 463 Table 3) indicated that there was a negative linear association between the score for depression and  
36  
37 464 rewards ( $\beta=-0.226$ ).

38  
39 465 The correlations of stress with the other measures of mental health (anxiety, exhaustion,  
40  
41 466 depersonalization, and personal accomplishment) were generally very weak (see the tables in the  
42  
43 467 annex). Anxiety was weakly correlated inversely with support and reward and directly with effort.  
44  
45 468 Exhaustion was significantly correlated with over-commitment. Depersonalization was inversely  
46  
47 469 related to reward. The personal accomplishment was significantly associated with control. The  
48  
49 470 socio-economic factors have often shown a greater predictive power on mental health than the stress  
50  
51 471 variables. The coefficient of determination ( $R^2$ ), however, was very low, even in more complex  
52 472 models.

**Formatted: Superscript**

1  
2  
3  
4  
5  
6  
7 473 By logistic regression (Table 4) we observed that for subjects in a state of "distress" according to  
8  
9 474 the DCS model (i.e. those with a simultaneous high level of "demand" and low level of "control"),  
10  
11 475 the risk of being depressed almost doubled (OR 1.92; 95% CI 0.76-4.84), although the association  
12  
13 476 was not statistically significant since the ranges of variability of the estimates included the  
14  
15 477 assumption of equivalence. If we take into account the lack of social support, which was  
16  
17 478 significantly associated with depression (OR 3.47; 95% CI 1.16-10.38), the condition of iso-strain  
18  
19 479 was associated with a significantly increased risk of depression (OR 7.39; CI 95% 2.46-22.23).  
20  
21 480 The police officers who were in a state of "distress" according to the ERI model (i.e. weighted ratio  
22  
23 481 between effort and reward more than 1) also had a much higher risk of depression (OR 7.39 CI 95%  
24  
25 482 2.46-22.23). Over commitment was associated with the risk of depression (OR 3.85; CI 95% 1.28-  
26  
27 483 11.54).

## Discussion

33  
34 487 This study investigated the association of a condition of "job distress" with the presence of self-  
35  
36 488 reported symptoms of depression, alongside with other common work-related mental problems such  
37  
38 489 as anxiety and burnout, in a special force police unit. Results from multiple regression analyses  
39  
40 490 showed that lower ERI-Effort scores predicted higher BDI scores, whereas results from logistic  
41  
42 491 regression analyses revealed that a higher effort/reward imbalance was associated with an  
43  
44 492 approximately sevenfold increase in risk of depression. These results suggest that, consistently with  
45  
46 493 previous studies, also in special force police officers the lower the reward opportunities, or the  
47  
48 494 higher the imbalance between the the effort spent to meet the demanding aspects of the work  
49  
50 495 environment and the reward (money, esteem and career opportunities, job security included), the  
51  
52 496 higher the depressive symptomatology. Studies based on the demand /control model indicate that  
53  
54 497 job strain is associated with depression (Bonde). A recent meta-analysis of studies on the

1  
2  
3  
4  
5  
6  
7 498 association between stress and mental disorders indicates that psychosocial problems in the  
8  
9 499 workplace, reduced control, job strain, low social support, and the discrepancy between effort and  
10  
11 500 rewards predict the onset of depression<sup>36</sup>. Another review of 14 longitudinal studies indicates that  
12  
13 501 lack of social support enhances depression<sup>37</sup>. The association we found between low reward and  
14  
15 502 symptoms is in agreement with that suggested by neurobiological studies on depression (Eshel and  
16  
17 503 Roiser). However, we could not replicate the finding that using both the DCS and the ERI model  
18  
19 504 provides greater predictive power for depressive disorders than models including only one of them  
20  
21 505 .<sup>38</sup> In this study, only the ERI model proved to be useful in predicting depression scores of officers.  
22 506 Lack of rewards and excessive over-commitment significantly increased depression scores and the  
23  
24 507 probability of disease, respectively. This result replicates the observations of Martins and Lopes<sup>39</sup>  
25  
26 508 who argued that effort, reward and over-commitment are associated with the presence of common  
27  
28 509 mental disorders among military personnel in peacetime, and those of Kingdom and Smith<sup>40</sup>, that  
29  
30 510 showed that ERI was the most important predictor of depression among police officers in the UK  
31  
32 511 Coast Guard and, more generally, with a large body of literature on the relationship between reward  
33  
34 512 processing and depressive symptoms (Eshel & Roiser (2010)). To a lesser extent, the DCS model  
35  
36 513 captured some important aspects, such as the lack of control over the organization of work and the  
37  
38 514 lack of support from colleagues or superiors. The importance of lack of support from superior and  
39  
40 515 organization in the occurrence of depression has already been reported by Berg et al. in the  
41  
42 516 Norwegian police<sup>33</sup>, and by Arial et al.<sup>30</sup> in a sample of Swiss police. Overall, both models appear  
43  
44 517 to be useful for diagnosing a situation of suffering which could result in disease. Although not the  
45  
46 518 main focus of this study, the ERI model also showed a good ability to predict anxiety and two of the  
47  
48 519 three core dimensions of burnout (i.e. emotional exhaustion and depersonalization), consistently  
49  
50 520 with previous studies (XX), whereas DCS-Control score was significantly associated with personal  
51  
52 521 accomplishment. Some background variables also showed a significant association with measures  
53  
54 522 of mental health. Higher length of employment (which overlaps age) was associated with higher

22

**Comment [DISA12]:** Griffin, J.M., Greiner, B.A., Stansfeld, S.A., & Marmot, M. (2007). The effect of self-reported and observed job conditions on depression and anxiety symptoms: a comparison of theoretical models. *Journal of Occupational Health Psychology*, 12, 334–349.  
Bakker, A.B., Killmer, C.H., Siegrist, J., & Schaufeli, W.B. (2000). Effort–reward imbalance and burnout among nurses. *Journal of Advanced Nursing*, 31, 884–891.

1  
2  
3  
4  
5  
6  
7 523 depressive symptomatology, anxiety, professional exhaustion and depersonalization, being  
8  
9 524 barracked was associated with higher anxiety and lower personal accomplishment, being an  
10  
11 525 operative agent was associated with higher professional exhaustion, having children was associated  
12  
13 526 with lower depersonalization. These results are in line with previous studies on armed forces  
14  
15 527 officers (XX)

16  
17 528 Sadly, investigating stress in police officers is particularly difficult because the latter are afraid of  
18  
19 529 being identified as individuals who have been compromised by stress. They fear that this might then  
20  
21 530 cause them to be discriminated against in their careers, removed from active duties and relegated to  
22  
23 531 office work. On the other hand, a study by Summerfield <sup>7</sup> found work stress to be the first cause of  
24  
25 532 sickness absence and reduction in operational duties, as well as the leading cause of ill health  
26  
27 533 retirement in police officers. A number of studies have previously evaluated occupational stress in  
28  
29 534 policemen using the DCS and ERI models. Job strain and effort/reward imbalance were associated  
30  
31 535 with cardiovascular risk in policewomen <sup>16</sup>, musculoskeletal disorders in special police forces <sup>17</sup>,  
32  
33 536 lower mental health level in correctional <sup>18</sup> and urban police officers <sup>19</sup>. The demand-control  
34  
35 537 model proved to be a valid theoretical framework to explain professional efficiency and exhaustion  
36  
37 538 <sup>20</sup> and the complex interplay between job demands, emotional exhaustion and other social and  
38  
39 539 individual factors <sup>21</sup>. Officers with greater perceived work stress in the first year of police service  
40  
41 540 showed more severe depression symptoms 12 months later <sup>22</sup>.

42  
43 541 It might be argued that only seven per cent of officers in our cohort reported a level of  
44  
45 542 depressive symptomatology higher than the risk threshold. In fact, such prevalence is lower than  
46  
47 543 that found by by Fox et al. <sup>28</sup> in urban US police officer (9%), by Frühwald et al. <sup>29</sup> in Lower  
48  
49 544 Austria (9%), by Arial et al. <sup>30</sup> in a Swiss officers (11.9%), by Chen et al. <sup>31</sup> in Taiwanese officers  
50  
51 545 (21.6%), and by Obidoa et al. <sup>32</sup> among US corrections officers (31%), and it is comparable with  
52  
53 546 that found in other working populations <sup>12-15</sup>. Moreover, a nationwide study in the Norwegian  
54  
55 547 police service showed that the younger police officers reported lower levels of depressive

**Comment [DISA13]:** Arata, K. V. (1996). *Burnout in the Armed Forces: Communication, Satisfaction, and Commitment*. Department of the Army, Washington, DC.

**Formatted:** Font color: Red, Highlight

**Formatted:** Highlight

1  
2  
3  
4  
5  
6  
7 548 symptoms than the corresponding general population<sup>33)</sup>. A recent comparison of police and other  
8  
9 549 employees found no indications that self-reported mental health disturbances are more prevalent  
10  
11 550 among police officers than among groups of employees that are not considered high-risk groups<sup>34)</sup>.  
12  
13 551 Since our sample was composed by young and highly selected police officers, which also shown an  
14  
15 552 emotional stability higher than the general population (XX) this result is not surprising. However,  
16  
17 553 this does not mean that the problem of depression in this special unit is negligible, and it cannot be  
18  
19 554 ignored that, beyond individual's health related risk factors, depression represents a considerable  
20  
21 555 cost for productivity both in terms of absenteeism and presenteeism<sup>35)</sup> and, more importantly given  
22  
23 556 that the delicate tasks the officers of this study have to accomplish, it increases the possibility of  
24  
25 557 errors and the risk to the health and safety of others. Hence, officers with depressive symptoms  
26  
27 558 should obtain timely and confidential assistance and the causes of excessive occupational stress  
28  
29 559 must be promptly identified and removed or minimized.

30 560 The results reported in this study should be interpreted with caution, as all the measures  
31  
32 561 were self-reported questionnaires, and thus reporting bias and subjectivity may have distorted the  
33  
34 562 observations. Depressed persons could be more likely to report psychosocial stress at work, even if  
35  
36 563 objectively their work environment is not at risk *per se*. The cross-sectional nature of the research  
37  
38 564 does not allow us to infer the direction of the observed phenomena, and thus separate cause from  
39  
40 565 effect. Specifically, we could not address the issue of whether the observed reduction in experience  
41  
42 566 of reward is an epiphenomenon of the presence of depressive symptoms. Finally, because our  
43  
44 567 sample corresponds to a specific police unit, and it is a relatively small cohort, our results may not  
45  
46 568 be generalizable to police officers in general, with different occupational exposure, nor to special  
47  
48 569 forces in countries with different ethnic or cultural characteristics. However, our study also has  
49  
50 570 several important strengths. To our knowledge, this is the first study to investigate associations of  
51  
52 571 depression with work stress in terms of both DCS and ERI models in special force police officers.  
53  
54 572 Such population has a high exposure to homogenous occupational risks, while many studies include

**Comment [DISA14]:** Garbarino et al.  
Personality Profiles of Special Force Police Officers

**Formatted:** Indent: First line: 0.49"

1  
2  
3  
4  
5  
6  
7 573 persons who perform very different tasks. The participation rate was very high (99%). Finally, since  
8  
9 574 the measurements used in this study have been validated in several other studies, our results are  
10  
11 575 more comparable with other research findings.

12  
13 576 Limitations notwithstanding, the present findings indicate that some aspects of psychosocial  
14  
15 577 environment at work, such as the imbalance between effort and reward, are associated with  
16  
17 578 depressive symptoms, anxiety and burnout in special force police officers. Although we could not  
18  
19 579 establish a casual relationships and these results need to be replicated in longitudinal studies, they  
20  
21 580 suggest that the dimensions of effort, reward and overcommitment can be useful in monitoring  
22  
23 581 special force police officers' psychological functioning.

24 582 ~~Our study, which to the best of our knowledge is the only conducted on a police unit of avant-garde,~~  
25  
26 583 ~~indicated that higher levels of work stress are associated with depressive symptoms. Both the work-~~  
27  
28 584 ~~related stress models we used were significantly associated with the presence of depressive~~  
29  
30 585 ~~symptoms, even if the effort / reward / imbalance model seemed to be more efficient in predicting~~  
31  
32 586 ~~mental ill health than the demand / control / support model.~~

33  
34 587 ~~Seven per cent of policemen in our cohort reported depressive symptoms. The prevalence is lower~~  
35  
36 588 ~~than that found by by Fox et al.<sup>28)</sup> in urban US policemen (9%), by Frühwald et al.<sup>29)</sup> in Lower~~  
37  
38 589 ~~Austria (9%), by Arial et al.<sup>30)</sup> in a Swiss sample of police officers (11.9%), by Chen et al.<sup>31)</sup> in the~~  
39  
40 590 ~~Taiwanese police (21.6%), and by Obidoa et al.<sup>32)</sup> among US corrections officers (31%), and it is~~  
41  
42 591 ~~comparable with that found in other working populations<sup>12-15)</sup>. A nationwide study in the~~  
43  
44 592 ~~Norwegian police service, indeed, showed that the younger policemen reported lower levels of~~  
45  
46 593 ~~depressive symptoms than the corresponding general population<sup>33)</sup>. A recent comparison of police~~  
47  
48 594 ~~and other employees found no indications that self-reported mental health disturbances are more~~  
49  
50 595 ~~prevalent among police officers than among groups of employees that are not considered high risk~~  
51  
52 596 ~~groups<sup>34)</sup>. Our sample was composed by young and highly selected policemen, and this may~~  
53  
54 597 ~~explain our findings.~~

1  
2  
3  
4  
5  
6  
7 598 Depression represents a considerable cost for productivity both in terms of absenteeism and  
8  
9 599 presenteeism<sup>35)</sup>. But much more important is the fact that this condition increases the possibility of  
10  
11 600 errors and the risk to the health and safety of others.  
12  
13 601 The results of our observations are in agreement with the literature. Studies based on the demand /  
14  
15 602 control model indicate that job strain is associated with depression (Bonde). A recent meta-analysis  
16  
17 603 of studies on the association between stress and mental disorders indicates that psychosocial  
18  
19 604 problems in the workplace, reduced control, job strain, low social support, and the discrepancy  
20  
21 605 between effort and rewards predict the onset of depression<sup>36)</sup>. Another review of 14 longitudinal  
22  
23 606 studies indicates that lack of social support enhances depression<sup>37)</sup>. The association we found  
24  
25 607 between low reward and symptoms is in agreement with that suggested by neurobiological studies  
26  
27 608 on depression (Eshel and Roiser). Even more recent studies go in the same direction. The two  
28  
29 609 effort-reward and demand-control support models used together have greater predictive power for  
30  
31 610 depressive disorders than a single model<sup>38)</sup>.  
32  
33 611 In this study, the ERI model proved particularly useful in interpreting the state of "distress" in  
34  
35 612 policemen. Excessive over-commitment and lack of rewards significantly increased depression  
36  
37 613 scores and the probability of disease. This result confirms the observations of Martins and Lopes<sup>39)</sup>  
38  
39 614 who argue that ERI and over-commitment are associated with the presence of common mental  
40  
41 615 disorders among military personnel in peacetime, and that of Kingdom and Smith<sup>40)</sup> showing that  
42  
43 616 ERI was the most important predictor of depression among police officers in the UK Coast Guard.  
44  
45 617 The DCS model captures some important aspects, such as the lack of full control over the  
46  
47 618 organization of work and the lack of support from colleagues or superiors. The importance of lack  
48  
49 619 of support from superior and organization in the occurrence of depression has already been reported  
50  
51 620 by Berg et al. in the Norwegian police<sup>33)</sup>, and by Arial et al.<sup>30)</sup> in a sample of Swiss police. Overall,  
52  
53 621 both models appear to be useful for diagnosing a situation of suffering which could result in  
54  
55 622 disease.

Formatted: Tab stops: 0", Left + Not at 2.17"

1  
2  
3  
4  
5  
6  
7  
8  
9  
10  
11  
12  
13  
14  
15  
16  
17  
18  
19  
20  
21  
22  
23  
24  
25  
26  
27  
28  
29  
30  
31  
32  
33  
34  
35  
36  
37  
38  
39  
40  
41  
42  
43  
44  
45  
46  
47  
48  
49  
50  
51  
52  
53  
54  
55  
56  
57  
58  
59  
60

The data emerging from our study should be interpreted with caution as subjectivity may have distorted the observations. The cross-sectional nature of the research does not allow us to infer the direction of the observed phenomena. Finally, because our sample corresponds to a specific police unit, and it is a rather small cohort, our results may not be generalizable to police officers in general, with different occupational exposure, nor to special forces in countries with different ethnic or cultural characteristics. However, our study also has several important strengths. To our knowledge, this is the first study to investigate associations linked to depression and work stress in terms of both DCS and ERI. The population had a very consistent exposure to homogenous occupational risks, while many studies include persons who perform very different tasks. The participation rate was very high (99%). Finally, since the measurements used in this study have been validated in several other studies, our results are more comparable with other research findings.

In this study we found a modest prevalence of depression, lower than that found in other police corps. This does not mean that the problem in this Italian special unit is negligible. Workers with depressive symptoms should obtain timely and confidential assistance. Furthermore, the causes of excessive occupational stress must be promptly identified and removed or minimized.

Formatted: English (U.K.)

Formatted: Line spacing: Double



## References

1. Komarovskaya I, Maguen S, McCaslin SE, Metzler TJ, Madan A, Brown AD, et al. The impact of killing and injuring others on mental health symptoms among police officers. *J Psychiatr Res*. 2011;45(10):1332-6.
2. Brown J, Fielding J, Grover J. Distinguishing traumatic, vicarious and routine operational stressor exposure and attendant adverse consequences in a sample of police officers. *Work Stress* 1999; 13:312-325
3. Leino TM, Selin R, Summala H, Virtanen M. Violence and psychological distress among police officers and security guards. *Occup Med (London)* 2011; 61 (6): 400-406
4. Berg AM, Hem E, Lau B, Håseth K, Ekeberg O. Stress in the Norwegian police service. *Occup Med (Lond)*. 2005; 55(2):113-20.
5. Garbarino S, Magnavita N, Elovainio M, Heponiemi T, Ciprani F, Cuomo G, Bergamaschi A. Police job strain during routine activities and a major event. *Occup Med (Lond)*. 2011; 61(6):395-9.
6. Winwood PC, Peters R, Peters M, Dollard M. Further validation of the psychological injury risk indicator scale. *J Occup Environ Med*. 2012;54(4):478-84.
7. Summerfield D. Metropolitan Police blues: protracted sickness absence, ill health retirement, and the occupational psychiatrist. *BMJ*. 2011;342:d2127.
8. Karasek RA. Job demands, job decision latitude, and mental strain. Implication for job redesign. *Adm Sci Q* 1979; 24: 285-308
9. Siegrist J. Adverse health effects of high-effort/low-reward conditions. *J Occup Health Psychol* 1996; 1:27-41
10. Magnavita N, Garbarino S. Social psychiatry in the waiting room. What a physician can learn about occupational stress from workers waiting to be examined. *Psy J*, 2012 (in press)

- 1  
2  
3  
4  
5  
6  
7 665 11. Nieuwenhuijsen K, Bruinvels D, Frings-Dresen M. Psychosocial work environment and  
8 stress-related disorders, a systematic review. *Occup Med (Lond)*. 2010; 60(4):277-86.  
9 666  
10  
11 667 12. Pflanz SE, Ogle AD. Job stress, depression, work performance, and perceptions of  
12 supervisors in military personnel. *Mil Med*. 2006;171(9):861-5.  
13 668  
14  
15 669 13. Iversen AC, van Staden L, Hughes JH, Browne T, Hull L, Hall J et al. The prevalence of  
16 common mental disorders and PTSD in the UK military: using data from a clinical  
17 670 interview-based study. *BMC Psychiatry*. 2009;9:68.  
18 671  
19  
20 672 14. Alonso J, Angermeyer MC, Bernert S, Bruffaerts R, Brugha TS, Bryson H, et al. Prevalence  
21 of mental disorders in Europe: results from the European Study of the Epidemiology of  
22 673 Mental Disorders (ESEMeD) project. *Acta Psychiatr Scand Suppl*. 2004; (420):21-7.  
23  
24 674  
25  
26 675 15. Huang SL, Lee HS, Li RH, Lai YM, Chen AL, Tang FC. Differences in ~~Health~~-[health](#)  
27 ~~Complaints~~-[complaints](#) among Taiwanese ~~Workers~~-[workers](#) in ~~Different~~-[different](#)  
28 676 ~~Occupational~~-[occupational](#) ~~Categories~~-[categories](#). *J Occup Health* 2012; 54(3):241-9.  
29  
30 677  
31  
32 678 16. Yoo H, Franke WD. Stress and cardiovascular disease risk in female law enforcement  
33 officers. *Int Arch Occup Environ Health*. 2011; 84(3):279-86.  
34 679  
35 680  
36  
37 681 17. von dem Knesebeck O, David K, Siegrist J. Psychosocial stress at work and musculoskeletal  
38 pain among police officers in special forces. *Gesundheitswesen*. 2005; 67(8-9):674-9.  
39 682  
40  
41 683 18. Bourbonnais R, Jauvin N, Dussault J, Vézina M. Psychosocial work environment,  
42 interpersonal violence at work and mental health among correctional officers. *Int J Law*  
43 684 *Psychiatry*. 2007; 30(4-5):355-68.  
44  
45 685 19. Janzen BL, Muhajarine N, Zhu T, Kelly IW. Effort-reward imbalance, overcommitment, and  
46 psychological distress in Canadian police officers. *Psychol Rep*. 2007; 100(2):525-30.  
47 686  
48  
49 687 20. Taris TW, Kompier MAJ, Geurts SAE, Houtman ILD, van den Heuvel FFM. Professional  
50 688 efficacy, exhaustion, and work characteristics among police officers: A longitudinal test of

Formatted: Swedish (Finland)

- 1  
2  
3  
4  
5  
6  
7 689 the learning-related predictions of the demand-control model. *J Occup Organizat Psychol*  
8  
9 690 2010; 83: 455-474  
10  
11 691 21. Hall GB, Dollard MF, Tuckey MR, Winefield AH, Thompson BM. Job demands, work-  
12 family conflicts, and emotional exhaustion in police officers: a longitudinal test of  
13 692 competing theories. *J Occup Organizat Psychol* 2010; 83: 237-250.  
14  
15 693  
16 694 22. Wang Z, Inslicht SS, Metzler TJ, Henn-Haase C, McCaslin SE, Tong H, et al. A prospective  
17 study of predictors of depression symptoms in police. *Psychiatry Res.* 2010;175(3):211-6.  
18 695  
19  
20 696 23. Magnavita N. Two tools for health surveillance of job stress: the Karasek Job Content  
21 Questionnaire and the Siegrist Effort Reward Imbalance Questionnaire. *G Ital Med Lav*  
22 697 *Ergon* 2007; 29 (3): 667-670  
23  
24 698  
25  
26 699 24. Beck AT, Rush AJ, Shaw BF, Emery G. *Cognitive therapy of depression.* Guilford Press,  
27 New York 1979  
28 700  
29  
30 701 25. Bunevicius A, Staniute M, Brozaitiene J, Pommer AM, Pop VJ, Montgomery SA,  
31 Bunevicius R. Evaluation of depressive symptoms in patients with coronary artery disease  
32 702 using the Montgomery Åsberg Depression Rating Scale. *Int Clin Psychopharmacol.*  
33 703 2012;27(5):249-55  
34  
35 704  
36  
37 705 26. Preljevic VT, Osthus TB, Sandvik L, Opjordsmoen S, Nordhus IH, Os I, Dammen T.  
38 Screening for anxiety and depression in dialysis patients: Comparison of the Hospital  
39 706 Anxiety and Depression Scale and the Beck Depression Inventory. *J Psychosom Res.*  
40 2012;73(2):139-44.  
41 707  
42  
43 708  
44  
45 709 27. Adachi Y, Aleksic B, Nobata R, Suzuki T, Yoshida K, Ono Y, Ozaki N. Combination use of  
46 Beck Depression Inventory and two-question case-finding instrument as a screening tool for  
47 710 depression in the workplace. *BMJ Open.* 2012;2(3). pii: e000596.  
48  
49 711  
50  
51  
52  
53  
54  
55  
56  
57  
58  
59  
60

- 1  
2  
3  
4  
5  
6  
7 712 28. Fox J, Desai MM, Britten K, Lucas G, Luneau R, Rosenthal MS. Mental-health conditions,  
8  
9 713 barriers to care, and productivity loss among officers in an urban police department. *Conn*  
10  
11 714 *Med.* 2012;76(9):525-31.
- 12  
13 715 29. Frühwald S, Entenfellner A, Grill W, Korbel C, Frottier P. Raising awareness about  
14  
15 716 depression together with service users and relatives - results of workshops for police officers  
16  
17 717 in Lower Austria. *Neuropsychiatr.* 2011;25(4):183-91.
- 18 718 30. Arial M, Gonik V, Wild P, Danuser B. Association of work related chronic stressors and  
19  
20 719 psychiatric symptoms in a Swiss sample of police officers; a cross sectional questionnaire  
21  
22 720 study. *Int Arch Occup Environ Health* 2010; 83: 323-331.
- 23  
24 721 31. Chen HC, Chou FH, Chen MC, Su SF, Wang SY, Feng WW, et al. A survey of quality of  
25  
26 722 life and depression for police officers in Kaohsiung, Taiwan. *Qual Life Res.*  
27  
28 723 2006;15(5):925-32.
- 29  
30 724 32. Obidoa C, Reeves D, Warren N, Reisine S, Cherniack M. Depression and work family  
31  
32 725 conflict among corrections officers. *J Occup Environ Med.* 2011;53(11):1294-301.
- 33  
34 726 33. Berg AM, Hem E, Lau B, Ekeberg Ø. An exploration of job stress and health in the  
35  
36 727 Norwegian police service: a cross sectional study. *J Occup Med Toxicol.* 2006 ;1:26.
- 37 728 34. van der Velden PG, Rademaker AR, Vermetten E, Portengen MA, Yzermans JC, Grievink  
38  
39 729 L. Police officers: a high-risk group for the development of mental health disturbances? A  
40  
41 730 cohort study. *BMJ Open.* 2013 Jan 24;3(1). doi:pii: e001720. 10.1136/bmjopen-2012-  
42  
43 731 001720
- 44  
45 732 35. Lee YM . Loss of productivity due to depression among Korean employees *J Occup Health*  
46  
47 733 2010; 52: 389-394.
- 48  
49 734 36. Stansfeld S, Candy B. Psychosocial work environment and mental health--a meta-analytic  
50  
51 735 review. *Scand J Work Environ Health.* 2006; 32(6):443-62.

- 1  
2  
3  
4  
5  
6  
7 736 37. Netterstrøm B, Conrad N, Bech P, Fink P, Olsen O, Rugulies R, Stansfeld S. The relation  
8  
9 737 between work-related psychosocial factors and the development of depression. *Epidemiol*  
10  
11 738 *Rev.* 2008; 30:118-32.
- 12  
13 739 38. Chen SW, Wang PC, Hsin PL, Oates A, Sun IW, Liu SI. Job stress models, depressive  
14  
15 740 disorders and work performance of engineers in microelectronics industry. *Int Arch Occup*  
16  
17 741 *Environ Health* 2011; 84(1):91-103.
- 18 742 39. Martins LCX, Lopes CS. Military hierarchy, job stress and mental health in peacetime. *Occ*  
19  
20 743 *Med (Oxford)* 2012; 62: 182-187
- 21  
22 744 40. Kingdom SE, Smith AP. Combined effects of work-related stress in Her Majesty's  
23  
24 745 Coastguard (HMCG). *Int Marit Health.* 2012;63(1):63-70.
- 25  
26 746 41. [Bonde JPE. Psychosocial factors at work and risk of depression: a systematic review of the](#)  
27  
28 747 [epidemiological evidence. \*Occup Environ Med.\* 2008;65:438-445.](#)  
29  
30 748 [doi:10.1136/oem.2007.038430](#)
- 31  
32 749 42. [Eshel N, Roiser JP. Reward and punishment processing in depression. \*Biol Psych\* 2010;](#)  
33  
34 750 [68\(2\): 118-124. DOI: 10.1016/j.biopsych.2010.01.027](#)
- 35 751 43. [Garbarino S, Magnavita N, Chiorri C, Brisinda D, Cuomo G, Venuti A, Fenici R.](#)  
36  
37 752 [Evaluation of operational stress in riot and crowd control police units: A global challenge](#)  
38  
39 753 [for prevention and management of police task-related stress. \*J Police Crim Psychol.\* 2012;](#)  
40  
41 754 [27\(2\): 111-122 DOI 10.1007/s11896-012-9104-8](#)
- 42  
43 755 44. [Magnavita N, Garbarino S. Is absence related to work stress? A repeated cross-sectional](#)  
44  
45 756 [study on a special police force. \*AJIM\* 2013 Jan 17 Published online in Wiley Online Library](#)  
46  
47 757 [DOI10.1002/ajim.22155.](#)
- 48  
49 758 45. [McEwen BS. Stress, adaptation and disease. Allostasis and allostatic load. \*Ann N Y Acad\*](#)  
50  
51 759 [Sci](#) 1998; 840: 33-44.

Formatted: Space After: 0 pt, Line spacing: Double

- 1  
2  
3  
4  
5  
6  
7 760 [46. Cooper B. Mental health epidemiology today: a monitor of distress. Epidemiol Psychiatr](#)  
8 [Sci. 2012;21\(2\):171-3.](#)
- 9 761  
10  
11 762 [47. Garbarino S, Chiorri C, Magnavita N. Personality traits of the Five-Factor Model are](#)  
12 [associated with work-related stress in special force police officers. IAOEH 2013 Mar 6 DOI:](#)  
13 763 [10.1007/s00420-013-0861-1](#)
- 14  
15 764  
16  
17 765 [48. Garbarino S, Chiorri C, Magnavita N, Piattino S, Cuomo G. Personality profiles among](#)  
18 [Special Force police officers. J Police Crim Psychol 2012; 27\(2\): 99-110.](#)
- 19 766  
20 767 [49. Cherry NM, Chen Y, McDonald JC. Reported incidence and precipitating factors of work-](#)  
21 [related stress and mental ill-health in the United Kingdom \(1996-2001\). Occup Med \(Lond\).](#)  
22 768 [2006;56\(6\):414-21.](#)
- 23  
24 769  
25  
26 770 [50. Melchior M, Caspi A, Milne BJ, Danese A, Poulton R, Moffitt TE. Work stress precipitates](#)  
27 [depression and anxiety in young, working women and men. Psychol Med. 2007;](#)  
28 771 [37\(8\):1119-29.](#)
- 29  
30 772  
31  
32 773 [51. Yuan C, Wang Z, Inslicht SS, McCaslin SE, Metzler TJ, Henn-Haase C, Apfel BA, Tong H,](#)  
33 [Neylan TC, Fang Y, Marmar CR. Protective factors for posttraumatic stress disorder](#)  
34 [symptoms in a prospective study of police officers. Psychiatry Res. 2011;188\(1\):45-50.](#)
- 35 775  
36  
37 776 [52. Evans R, Pistrang N, Billings J. Police officers' experiences of supportive and unsupportive](#)  
38 [social interactions following traumatic incidents. Eur J Psychotraumatol. 2013;4. doi:](#)  
39 777 [10.3402/ejpt.v4i0.19696.](#)
- 40  
41 778  
42  
43 779 [53. Galatzer-Levy IR, Brown AD, Henn-Haase C, Metzler TJ, Neylan TC, Marmar CR. Positive](#)  
44 [and Negative Emotion Prospectively Predict Trajectories of Resilience and Distress Among](#)  
45 780 [High-Exposure Police Officers. Emotion. 2013 Jan 21.](#)
- 46  
47 781  
48  
49 782 [54. Violanti JM. Police organizational stress: the impact of negative discipline. Int J Emerg](#)  
50 [Ment Health. 2011;13\(1\):31-6.](#)
- 51 783  
52  
53  
54  
55  
56  
57  
58  
59  
60

Formatted: Normal, Left

Formatted: Font: Times New Roman, 12 pt

Formatted: English (U.K.)

Formatted: List Paragraph, Justified, Line spacing: Double

Formatted: English (U.S.)

Formatted: English (U.S.)

1  
2  
3  
4  
5  
6  
7 784 [55. Marchand A, Blanc ME. The contribution of work and non-work factors to the onset of](#)  
8  
9 785 [psychological distress: an eight-year prospective study of a representative sample of](#)  
10  
11 786 [employees in Canada. J Occup Health. 2010; 52\(3\):176-85.](#)

Formatted: English (U.S.)

12  
13 787 [56. van Rhenen W, van Dijk FJ, Schaufeli WB, Blonk RW. Distress or no distress, that's the](#)  
14  
15 788 [question: A cutoff point for distress in a working population. J Occup Med Toxicol. 2008;](#)  
16  
17 789 [18;3:3.](#)

Formatted: Dutch (Netherlands)

Formatted: English (U.S.)

Formatted: English (U.S.)

Formatted: English (U.K.)

18 790 [57. Jones M, Rona RJ, Hooper R, Wessely S. The burden of psychological symptoms in UK](#)  
19  
20 791 [Armed Forces Occup Med \(Lond\). 2006;56\(5\):322-8.](#)

Formatted: English (U.S.)

Formatted: English (U.S.)

22 792 [58. Iversen A, Dyson C, Smith N, et al. Prevalence of mental disorders in Europe: results from](#)  
23  
24 793 [the European Study of the Epidemiology of Mental Disorders \(ESEMeD\) project. Acta](#)  
25  
26 794 [Psychiatr Scand Suppl. 2004; 420:21-7.](#)

Formatted: Norwegian (Bokmål)

Formatted: English (U.S.)

28 795 [59. Hilton MF, Whiteford HA, Sheridan JS, et al. The prevalence of psychological distress in](#)  
29  
30 796 [employees and associated occupational risk factors. J Occup Environ Med 2008; 50\(7\):746-](#)  
31  
32 797 [57.](#)

Formatted: English (U.S.)

33 798 [60. Fan ZJ, Bonauto DK, Foley MP, Anderson NJ, Yragui NL, Silverstein BA. Occupation and](#)  
34  
35 799 [the prevalence of current depression and frequent mental distress. WA BRFSS 2006 and](#)  
36  
37 800 [2008. Am J Ind Med. 2012;55\(10\):893-903. doi: 10.1002/ajim.22094.](#)

Formatted: English (U.S.)

39 801 [40-61. van der Klink JJ, van Dijk FJ. Dutch practice guidelines for managing adjustment](#)  
40  
41 802 [disorders in occupational and primary health care. Scand J Work Environ Health. 2003;](#)  
42  
43 803 [29\(6\):478-87.](#)

Formatted: Dutch (Netherlands)

Formatted: English (U.S.)

Formatted: Italian (Italy)

Formatted: Italian (Italy)



**Association of work-related stress with mental health problems in a special police force unit**

|                                 |                                                                                                                                                                                                                                                                                                                                                            |
|---------------------------------|------------------------------------------------------------------------------------------------------------------------------------------------------------------------------------------------------------------------------------------------------------------------------------------------------------------------------------------------------------|
| Journal:                        | <i>BMJ Open</i>                                                                                                                                                                                                                                                                                                                                            |
| Manuscript ID:                  | bmjopen-2013-002791.R2                                                                                                                                                                                                                                                                                                                                     |
| Article Type:                   | Research                                                                                                                                                                                                                                                                                                                                                   |
| Date Submitted by the Author:   | 17-Jun-2013                                                                                                                                                                                                                                                                                                                                                |
| Complete List of Authors:       | Garbarino, Sergio; University of Genoa, Department of Neuroscience, Ophthalmology and Genetics<br>Cuomo, Giovanni; Ministry of the Interior, State Police Health Service Department<br>Chiorri, Carlo; University of Genoa, Department of Educational Sciences, Psychology Unit,<br>Magnavita, Nicola; Università Cattolica del Sacro Cuore, Public Health |
| <b>Primary Subject Heading</b>: | Occupational and environmental medicine                                                                                                                                                                                                                                                                                                                    |
| Secondary Subject Heading:      | Medical management, Public health, Mental health                                                                                                                                                                                                                                                                                                           |
| Keywords:                       | OCCUPATIONAL & INDUSTRIAL MEDICINE, Depression & mood disorders < PSYCHIATRY, PUBLIC HEALTH                                                                                                                                                                                                                                                                |
|                                 |                                                                                                                                                                                                                                                                                                                                                            |

SCHOLARONE™  
Manuscripts



1  
2  
3  
4  
5  
6  
7  
8  
9  
10  
11  
12  
13  
14  
15  
16  
17  
18  
19  
20  
21  
22  
23  
24  
25  
26  
27  
28  
29  
30  
31  
32  
33  
34  
35  
36  
37  
38  
39  
40  
41  
42  
43  
44  
45  
46  
47  
48  
49  
50  
51  
52  
53  
54  
55  
56  
57  
58  
59  
60

1 **Association of work-related stress with mental health problems in a special police force unit**

2

3

4 **Sergio Garbarino**<sup>1,2</sup>, **Giovanni Cuomo**<sup>2</sup>, **Carlo Chiorri**<sup>3</sup>, **Nicola Magnavita**<sup>4</sup>.

5

6

1. State Police Health Service Department, Ministry of the Interior, Rome, Italy

7

2. Department of Neuroscience, Ophthalmology and Genetics, University of Genoa, Genoa, Italy

8

3. Department of Educational Sciences, Psychology Unit, University of Genoa, Genoa, Italy

9

4. Department of Public Health, Occupational Health Unit, Università Cattolica del Sacro Cuore, Largo Gemelli 8, 00168 Roma, Italy. e-mail: [nicolamagnavita@gmail.com](mailto:nicolamagnavita@gmail.com)

10

11

12 *Correspondence to:* N. Magnavita. Tel. +39-347-3300367, Fax: +39-06-61909399, e-mail [nicolamagnavita@gmail.com](mailto:nicolamagnavita@gmail.com);

13

[nmagnavita@rm.unicatt.it](mailto:nmagnavita@rm.unicatt.it)

14

15

16

17 **Type of contribution: Original**

18

19 **Running title: Stress and mental health in police**

20

21 Word count: 5258 words

22 Abstract, word count: 278

23

24 Tables: 5

25 Figures: 0

26

27 **Funding:** This research received no specific grant from any funding agency in the public,  
28 commercial or not-for-profit sectors.

1  
2  
3 29

4  
5 30 **Competing interest:** none declared. A complete declaration on competing interest will be signed  
6  
7 31 by all authors before the publication of the paper.  
8

9 32

10  
11 33 **Author's contribution:** SG carried out medical examinations on workers, CC administered the  
12  
13 34 psychological tests and revised statistics, NM carried out the statistical analyses and drafted the  
14  
15 35 work, GC revised the work.  
16

17 36

18  
19  
20 37 **Data sharing statement:** Technical appendix, statistical code, and dataset available from the  
21  
22 38 corresponding author at Dryad repository, who will provide a permanent, citable and open access  
23  
24 39 home for the dataset.  
25

26 40  
27  
28  
29  
30  
31  
32  
33  
34  
35  
36  
37  
38  
39  
40  
41  
42  
43  
44  
45  
46  
47  
48  
49  
50  
51  
52  
53  
54  
55  
56  
57  
58  
59  
60

1  
2  
3 41 **Abstract**  
4  
5 42  
6  
7 43

8 **Objectives.** Law and order enforcement tasks may expose special force police officers to significant  
9  
10 44 psychosocial risk factors. The aim of this work is to investigate the relationship between job stress  
11  
12 45 and the presence of mental health symptoms while controlling for socio-demographical,  
13  
14 46 occupational and personality variables in special force police officers.

15  
16 47 **Method:** At different time points, 292 out of 294 members of the 'VI Reparto Mobile', a special  
17  
18 48 police force engaged exclusively in the enforcement of law and order, responded to our invitation to  
19  
20 49 complete questionnaires for the assessment of personality traits, work-related stress (using the  
21  
22 50 demand-control-support (DCS) and the effort-reward-imbalance (ERI) models), and mental health  
23  
24 51 problems such as depression, anxiety and burnout.

25  
26  
27 52 **Results:** Regression analyses showed that lower levels of support and reward and higher levels of  
28  
29 53 effort and overcommitment were associated with higher levels of mental health symptoms.  
30  
31 54 Psychological screening revealed 21 (7.3%) likely cases of mild depression (BDI  $\geq 10$ ). Officers  
32  
33 55 who had experienced a discrepancy between work effort and rewards showed a marked increase in  
34  
35 56 the risk of depression (OR 7.89 95%CI 2.32-26.82) when compared with their counterparts who did  
36  
37 57 not perceive themselves to be in a condition of distress.

38  
39  
40 58 **Conclusions:** The findings of this study suggest that self-reported work-related stress may play a  
41  
42 59 role in the development of mental health problems in police officers. The prevalence of mental  
43  
44 60 health symptoms in the cohort investigated here was low, but not negligible in the case of  
45  
46 61 depression. Since special forces police officers have to perform sensitive tasks for which a healthy  
47  
48 62 psychological functioning is needed, the results of this study suggest that steps should be taken to  
49  
50 63 prevent distress and improve the mental well-being of these workers.  
51  
52 64

1  
2  
3 65 **Keywords:** effort-reward imbalance, depression, distress, job strain, mental health, over-  
4  
5 66 commitment, police, social support, work-related stress.  
6  
7  
8

67

9  
10 68 **Article summary**

11  
12 69 *'Article focus'*

13  
14 70 Mental health in special police forces is a critical issue. Police officers are exposed to acute and  
15  
16 71 chronic stress and may develop mental health problems. The impairment of police officers'  
17  
18 72 psychological functioning can be a serious threat to the safety of the public.  
19

20  
21 73

22  
23 74 *'Key messages'*

24  
25 75 The prevalence of mental health problems in special force police officers is lower than that of the  
26  
27 76 general population and other groups of police job distress (or job stress) measures and mental health  
28  
29 77 symptoms was found. The prevention of distress and the treatment of mental health disorders  
30  
31 78 among police officers are necessary for the safety of the workers themselves and the public.  
32  
33

34 79

35  
36 80 *'Strengths and limitations of this study'*

37  
38 81 This is the first study to investigate the association of job distress with mental health symptoms in a  
39  
40 82 special force police unit. It has a high participation rate. The study has been conducted on a  
41  
42 83 relatively small cohort, and with only self-report measures. .  
43  
44

45 84  
46  
47  
48  
49  
50  
51  
52  
53  
54  
55  
56  
57  
58  
59  
60

## 85 Introduction

86 It is generally agreed that mental health disorders have a multifactorial etiology and, in the last few  
87 decades, research has focused on the role of working conditions in determining people's mental  
88 health [1, 2]. In fact, workers themselves often report that their work affects their health [3] and  
89 intangible costs arising from the suffering of workers are being added to direct financial costs due to  
90 absenteeism, presenteeism, reduced productivity and compensation. Police officers operating in  
91 special force units engaged in law enforcement and riot control are a category of workers that is  
92 considered particularly at risk for the development of mental health disturbances because of the  
93 possible exposure to violent events and traumas and hence to post-traumatic stress disorder, but in  
94 fact traumatic accidents rarely occur. However, the long term effect of the psychological stress due  
95 to the constant risk of being injured, wounded or even killed while on patrol and to the witnessing  
96 of violence and death tends to be overlooked. This may not be immediately perceived as  
97 detrimental, but it can still induce maladaptive reactions [3]. Although it has been shown that police  
98 officers are more resilient to stress than civilians [4-7], several studies have provided evidence that  
99 adverse work conditions are related to poor mental health outcomes (e.g., [8]) In addition to these  
100 operational work-related challenges, police officers may be exposed to organizational problems that  
101 are common within hierarchical, male-dominated paramilitary structures such as fire-fighting,  
102 ambulance and paramedic services [9-10]. Paradoxically, daily organizational stressors may be  
103 more challenging than operational experiences, as shown by a recent study in which reported levels  
104 of perceived stress in a group of police officers were higher during routine jobs than during a high-  
105 risk public event [11]. Both a dramatic violent event and a repeated and prolonged series of  
106 administrative events can cause an allostatic load, i.e., a neurobiological maladaptive reaction due  
107 to being forced to adapt to challenging environments characterized by behavioral and emotional  
108 changes known as "distress" [12]. Through interaction with many different individual factors,  
109 distress can induce the occurrence of mental disorders such as anxiety, depression, burnout,

1  
2  
3 110 conversion disorder and other conditions classified in DSM IV [13]. Psychological dysfunction  
4  
5 111 resulting from job distress can be a gradual and progressive process that impairs well-being over  
6  
7 112 time. This gradual evolution often leaves the worker unaware of the problem, or unwilling to  
8  
9 113 acknowledge its importance, at least until the severity of the symptoms makes it clear to colleagues,  
10  
11 114 family, or both. The recognition of emotional problems due to work-related distress is rarely, if  
12  
13 115 ever, encouraged in the law enforcement sector, since it is considered a sign of weakness [14].  
14  
15 116 Consequently, police officers fail to seek professional help early enough to prevent diagnosis and  
16  
17 117 quickly benefit from treatment. This is one of the main reasons for which mental disorders are the  
18  
19 118 leading cause of retirement in the police force [15].  
20  
21

22  
23 119 The two leading models that have been used to describe and explain individual perception of stress  
24  
25 120 factors are the Demand/Control/Support (DCS) model, developed by Karasek [16], and the  
26  
27 121 Effort/Reward Imbalance (ERI) model, developed by Siegrist [17]. The DCS model assumes that  
28  
29 122 the primary sources of job stress, or "job strain", stem from two basic characteristics of the job  
30  
31 123 itself: "job demand" and "job control". The model predicts that job strain is not simply a function of  
32  
33 124 job demand, but also depends on the amount of control the worker has over the work. Job demand  
34  
35 125 takes into consideration the pace and intensity of work: work overload, degree of difficulty,  
36  
37 126 available time, time allotted to executing tasks and the existence of contradictory or conflicting  
38  
39 127 orders. Job decision latitude, or job control, refers to the worker's ability to control his own  
40  
41 128 activities and skill usage. Social support at work, a moderating factor of job strain, was  
42  
43 129 subsequently included in the model. According to this model, high psychological demands in  
44  
45 130 conjunction with low decision latitude can contribute to the development of psychological  
46  
47 131 problems, and workers with high job strain and low social support at work are thought to be the  
48  
49 132 most vulnerable to negative health effects (the so-called "isolated strain", or "isostrain", hypothesis  
50  
51 133 [18].  
52  
53  
54  
55  
56  
57  
58  
59  
60

1  
2  
3 134 The ERI model puts emphasis more on the reward rather than the control structure of work,  
4  
5 135 suggesting that mental distress and its health correlates arise when a high degree of effort is not  
6  
7 136 adequately rewarded in the form of pay, esteem, status consistency or career opportunities. A  
8  
9  
10 137 further assumption of this model involves individual differences in the perception of effort-reward  
11  
12 138 imbalance: people with a motivational pattern of excessive work-related commitment and high need  
13  
14 139 for approval (over-commitment) are at increased risk of strain, and, consequently, health problems  
15  
16 140 [17]. The DCS model, developed in the 1960s, appears to be more suitable for the physical aspects  
17  
18 141 of occupational stress, while the ERI model, designed for the tertiary society of the 1980s, is more  
19  
20 142 sensitive to stress arising from work relations and organizational factors [19].  
21

22  
23 143 Unfortunately, in literature there is no agreed definition of "distress", although there is some  
24  
25 144 consensus in considering it as an unfavorable and unpleasant response to stress. Due to such a  
26  
27 145 vague definition, the prevalence of workers with distress in published studies can range from 5% to  
28  
29 146 50% [20-22]. When distress reaches clinical relevance it is defined as "stress-related disorder". This  
30  
31 147 term includes a variety of clinical conditions, which are collectively labeled as "common mental  
32  
33 148 disorders" (CMD) [23] and one of the most common diagnoses is depression [24]. However, a  
34  
35 149 systematic review of evidence on psychosocial factors at work and depression revealed a high  
36  
37 150 degree of study heterogeneity [25], although other studies found moderate evidence of a  
38  
39 151 relationship between the psychological demands of a job and the development of depression, with  
40  
41 152 relative risks of approximately 2.0 [26]. Distress and mental health problems caused by work can  
42  
43 153 affect the performance of professional activity, especially in a sensitive area such as law  
44  
45 154 enforcement. The consequences of stress on the mental health of police officers can thus be  
46  
47 155 particularly serious not only for the increased risk of individual health problems, and but also on  
48  
49 156 account of the increased risk of impaired work performance that could jeopardize the safety and  
50  
51 157 health of the general population. For instance, as reported by Violanti [27], depression can be a  
52  
53 158 contributing factor not only in early retirement, but also in police officer suicides, murder-suicides,  
54  
55  
56  
57  
58  
59  
60

1  
2  
3 159 domestic violence, unnecessary violence and aggression while in service, that occurs over and  
4  
5 160 above the role played by police culture that might encourage aggressive and authoritarian attitudes.  
6

7 161 Sadly, investigating stress in police officers is particularly difficult because they are afraid  
8  
9 162 of being identified as individuals who have been compromised by stress. They fear that this might  
10  
11 163 then cause them to be discriminated against in their careers, removed from active duties and  
12  
13 164 relegated to office work. On the other hand, a study by Summerfield [15] found work stress to be  
14  
15 165 the first cause of sickness absence and a reduction in operational duties, as well as the leading  
16  
17 166 cause of ill health retirement in police officers. A number of studies have previously evaluated  
18  
19 167 occupational stress in policemen using the ERI and DCS models. Job strain and effort/reward  
20  
21 168 imbalance were associated with cardiovascular risk in policewomen [28], musculoskeletal disorders  
22  
23 169 in special police forces [29], lower mental health level in correctional [30] and urban police officers  
24  
25 170 [31] [58]. The DCS model proved to be a valid theoretical framework for explaining professional  
26  
27 171 efficiency and exhaustion [32] and the complex interplay between job demands, emotional  
28  
29 172 exhaustion and other social and individual factors[33]. Officers with greater perceived work stress  
30  
31 173 in the first year of police service showed more severe depression symptoms 12 months later [34].  
32  
33  
34  
35

36 174 The aim of this study was to investigate the association of a condition of "distress" with the  
37  
38 175 presence of self-reported symptoms of depression, anxiety and burnout, in a special force unit of the  
39  
40 176 Italian police while controlling for socio-demographical and occupational variables and personality  
41  
42 177 traits. Previous studies on this cohort have shown that younger officers, those who were single, had  
43  
44 178 a shorter length of service, lived in barracks, had a lower rank and who were closer to their families  
45  
46 179 had a higher short-term sickness absence risk [35] and that DCS control and support and ERI  
47  
48 180 reward measures were negatively related to frequency of absence and short-term absence and that  
49  
50 181 DCS demand and ERI effort measures were positively related to total lost days [36] Moreover, it  
51  
52 182 has been reported that the majority of these officers described themselves as much more  
53  
54 183 emotionally stable and slightly-to-moderately more extraverted, agreeable, conscientious and open  
55  
56  
57  
58  
59  
60



1  
2  
3 184 to experience than the general population and career soldiers [4] and that some personality traits  
4  
5 185 (mainly emotional stability and agreeableness) were associated to perceived stress levels or  
6  
7 186 reactivity to environmental stressors [37].  
8

9  
10 187 **Method**

11  
12 188 *Participants*

13  
14 189 Participants were the members of 'VI Reparto Mobile' of Genoa, a police special force unit called  
15  
16 190 on to maintain law and order in all the major public events that take place in Italy. These officers  
17  
18 191 work exclusively as First Responders; they are carefully selected from ordinary officers and receive  
19  
20 192 specific psychophysical and tactical training. Their routine work involves ensuring order during  
21  
22 193 sporting events, crowds and parades, natural and social emergencies, and they are also often  
23  
24 194 involved in public events in which there is a high risk of terrorist attacks and physical clashes.  
25  
26 195 During a single riot, they are on duty for an average of 10 or more hours of work, are engaged in  
27  
28 196 physical clashes for over an hour on average, and often feel that they are in imminent danger of  
29  
30 197 death. They have a special and on-going education which aims to improve team spirit ("esprit de  
31  
32 198 corps") and increase their preparation for dramatic events. The decision to hold the 2009 G8  
33  
34 199 meeting in Italy provided the opportunity for carrying out our present study. The police officers  
35  
36 200 selected to ensure law and order during this event were asked to undergo a thorough examination of  
37  
38 201 their mental health condition so that their conduct during the meeting could not be stigmatized.  
39  
40 202 The unit is composed of 294 members. Two officers refused to take part in the study and one was  
41  
42 203 unable to complete all the tests in the battery described in the next section and was therefore  
43  
44 204 excluded. The participation rate was 99%. Since only two officers were female, gender differences  
45  
46 205 could not be assessed and were therefore excluded from the analyses. The final group of  
47  
48 206 participants therefore comprised 289 officers (see Table 1 for descriptive statistics of the socio-  
49  
50 207 demographic variables).  
51  
52  
53

54  
55  
56 208 

---

Insert Table 1 about here

---

1  
2  
3 209 *Materials*

4  
5 210 *Personality measure*

6  
7 211 *Big Five Questionnaire* (BFQ) [38, 39]. The BFQ is a self-report measure of the Big Five  
8  
9 212 personality traits: Energy (E, Extraversion), Friendliness (F, Agreeableness), Conscientiousness (C),  
10 213 Emotional Stability (S, the opposite of Neuroticism), and Openness (O). Each scale contains 24  
11 214 short phrases that eliminate some of the ambiguity that might arise when using single adjectives.  
12 215 Participants are asked to rate the degree to which each item adequately describes them on a 5-point  
13 216 Likert-type scale ranging from complete disagreement (1=absolutely false for me) to complete  
14 217 agreement (5=very true for me). Total raw scores, ranging for each variable from 24 to 120, were  
15 218 converted before analyses into standardized *T* scores ( $M=50$ ,  $SD=10$ ) using the Italian norms  
16 219 published in Caprara et al. [38]. In this study reliabilities (Cronbach's alphas) of the scales were  
17 220  $E=.69$ ,  $F=.80$ ,  $C=.82$ ,  $S=.88$ , and  $O=.77$ .

18  
19  
20  
21  
22  
23 221 *Stress measures*

24  
25 222 Occupational stress was assessed using the validated Italian versions [40] of two standardized  
26 223 questionnaires: the *Demand-Control-Support* (DCS) questionnaire, derived from the longer *Job*  
27 224 *Content Questionnaire* [16], and the *Effort-Reward Imbalance* (ERI) questionnaire [17]. DCS is a  
28 225 17-item self-report questionnaire that provides scores on three scales: *Psychological Job Demand*,  
29 226 (Demand, 5 items mapping quantitative aspects of work, such as time required to perform tasks, and  
30 227 conflict among different demands), *Job Control/Decision Latitude* (Control, 6 items mapping the  
31 228 use and development of skills and autonomy in making decisions about the work process) and  
32 229 *Workplace Social Support* (Support, 6 items mapping relationships between coworkers and  
33 230 superiors). Participants are asked to rate each item on a 4-point frequency (Demand and Control) or  
34 231 agreement (Support) scale. In this study reliabilities (Cronbach's alphas) of the scales were .71, .65  
35 232 and .84, respectively. Along with scale sum scores, a further index, "perceived job strain" (DCS-Job  
36 233 Strain) was computed by dividing the mean item score of Demand by the mean item score of the

1  
2  
3 234 Control scale. A ratio of 1 indicates a balance between demand and control; values >1 indicate  
4  
5 235 excessive perceived job strain [41]. ERI is a 23-item self-report questionnaire that assesses three  
6  
7 236 dimensions: *Effort* (6 items mapping the demanding aspects of the work environment), *Reward* (11  
8  
9 237 items mapping the occupational rewards that the worker expects to receive), and *Overcommitment*  
10  
11 238 (6 items mapping the intrinsic personal factors regarding occupational motivation and participation  
12  
13 239 that enhance the effects of stress). Participants are asked to rate each item on a 5-point intensity  
14  
15 240 scale. In this study, reliabilities of the scales were .82, .89 and .79, respectively. Along with scale  
16  
17 241 sum scores, the weighted ratio between effort and reward (E/R Ratio) was computed to quantify the  
18  
19 242 degree of mismatch between effort and reward. Values >1 reflect an imbalance that can induce  
20  
21 243 stress [42].  
22

#### 23 244 *Mental health measures*

24  
25 245 Depression was evaluated by the *Beck Depression Inventory* (BDI) [43], as this questionnaire  
26  
27 246 proved to be effective for depression screening [44, 45]. The BDI consists of 21 groups of 4  
28  
29 247 alternative self-evaluation statements used to assess the presence and severity of the affective,  
30  
31 248 cognitive, motivational, psychomotor, and vegetative components of depression, with higher scores  
32  
33 249 indicating more severe depression. If multiple responses are chosen under one item, the most  
34  
35 250 symptomatic item is scored. Statement choices are scored from 0 (absent) to 3 (severe) and can total  
36  
37 251 from 0 to 63. In this study, internal consistency was 0.81. The cut-off score commonly used in  
38  
39 252 clinical practice for depression screening is 10 [46]. The probability of suffering major depressive  
40  
41 253 disorder rapidly increases above this threshold, so a higher score of 14 [44] or 16 [45] is often  
42  
43 254 chosen in order to reduce the prevalence of false positive in populations consisting of patients  
44  
45 255 affected by chronic diseases with poor or severe prognosis. In this study, we adopted the classical  
46  
47 256 cut-off level of 10, as the subjects tested were young, active and highly selected.  
48  
49 257 Anxiety was assessed with the *State-Trait Anxiety Inventory–Trait* (STAI-T) [47] Italian version  
50  
51 258 [48]. The STAI-T is a 20-item self-report measure of anxiety proneness requiring participants to  
52  
53  
54  
55  
56  
57  
58  
59  
60

1  
2  
3 259 rate their frequency of anxiety symptoms on a 4-point Likert-type scale. Nine items are reverse  
4  
5 260 scored. According to [48], the cut-off score used in clinical practice for anxiety screening is 40. In  
6  
7 261 this study the reliability of the scale was .74.

8  
9 262 The *Maslach Burnout Inventory* (MBI) [49] Italian version [50] is a 22-item self-report measure of  
10  
11 263 professional burnout. It provides scores on three facets of burnout: Professional Exhaustion (PE, 9  
12  
13 264 items mapping feelings of being emotionally overextended and exhausted by one's work),  
14  
15 265 Depersonalization (DP, 5 items mapping an unfeeling and impersonal response towards the  
16  
17 266 recipients of one's care) and Personal Accomplishment (PA, 8 items mapping feelings of  
18  
19 267 competence and successful achievement in one's work with people). Participants are asked to rate  
20  
21 268 the frequency of experiencing feelings related to each subscale using a 7-point, Likert-type scale.  
22  
23 269 According to Violante et al. [51], a burnout condition can be defined by scores higher than 23 on  
24  
25 270 PE, higher than 8 on DP and lower than 30 on PA. In this study reliabilities of the scales were  
26  
27 271 PE=.86, DP=.60 and PA=.80, respectively.

### 272 *Control Variables*

273 The control variables used in our study were: age (years), length of employment (years of service);  
274 education level (lower vs. equal/higher than high school); rank (officer vs. supervisor/technical  
275 staff); origin (Northern or Southern Italy); housing (in barracks or home); marital status  
276 (single/divorced vs. married/cohabiting); presence of children (no/yes).

### 277 *Procedure*

278 Personality traits were assessed in January 2009. Perceived stress was measured on three separate  
279 occasions: (1) in January 2009, when officers were engaged only in routine work; (2) in April 2009,  
280 when they underwent specific training in preparation for the meeting, and (3) in July 2009, shortly  
281 before the Genoa G8 summit meeting took place. Following the procedure already adopted in  
282 previous work [36, 37], we averaged the three measurements into a single value, to obtain the level

1  
2  
3 283 of stress that each officer had experienced during that period. Mental health was assessed in  
4  
5 284 September 2009.

6  
7 285 *Ethics*

8  
9 286 All participants were tested anonymously and confidentially during their routine psychophysical  
10  
11 287 assessment. Anonymity was achieved by identifying participants with an alphanumeric code,  
12  
13 288 double-blind. The study protocol was approved by the Ethics Committee of the Università Cattolica  
14  
15 289 del Sacro Cuore, Faculty of Medicine, the Institute of Occupational Medicine, responsible for co-  
16  
17 290 coordinating the study, and the National Police Management Board and the whole procedure  
18  
19 291 followed the Ethical Principles of Psychologists Code of Conduct (American Psychological  
20  
21 292 Association 2002).

22  
23 293 *Statistical analyses*

24  
25 294 The first research question we addressed was whether there was a relationship between the  
26  
27 295 individual level of work-related stress and mental health problems after controlling for socio-  
28  
29 296 demographical and personality variables. In order to do this we used hierarchical multiple linear  
30  
31 297 regression models in which BDI, STAI and MBI scores were specified as criteria. In Model 1, only  
32  
33 298 the control variables were specified as predictors. In Model 2, the BFQ personality scores were  
34  
35 299 entered in the regression model. In Model 3 and 4, scale scores from the DCS and from the ERI  
36  
37 300 questionnaires, respectively, were added as further predictors. In Model 5, control variables, BFQ  
38  
39 301 personality scores and DCS and ERI scores were specified as predictors. The degree of association  
40  
41 302 between variables was indexed by the regression coefficient computed on the standardized variables  
42  
43 303 ( $\beta$ ). The amount of variance of the depression score accounted for by the predictors (and the  
44  
45 304 goodness of fit of the regression model) was indexed by the adjusted  $R^2$ . Since age and length of  
46  
47 305 employment were highly correlated ( $r = .91$ ), only the latter was used as a predictor. In order to  
48  
49 306 minimize the potentially confounding effects of multicollinearity, we partialized the effects through  
50  
51 307 principal component analysis.  
52  
53  
54  
55  
56  
57  
58  
59  
60

1  
2  
3 308 We then tested the risk of suffering from depression, anxiety and burnout for a police officer  
4  
5 309 in a state of distress. We used binary logistic regression, and caseness for each construct was  
6  
7 310 defined as a BDI score  $\geq 10$  for depression, a STAI score  $> 40$  for anxiety, MBI-PE  $> 23$  and MBI-  
8  
9 311 DP  $> 8$  and MBI-PA  $< 30$  for burnout. DCS-Job Strain, social isolation (DCS-Support score below  
10  
11 312 the median), isostrain (job strain plus social isolation, i.e. support below the median), Effort/Reward  
12  
13 313 imbalance (E/R ratio  $> 1$ ), and Over-Involvement in work (ERI-Overcommitment score above the  
14  
15 314 median) were used as predictors. The resulting values ("raw" or unadjusted) were subsequently  
16  
17 315 corrected by adding the socio-demographic variables to the equation. Odds ratios (OR) and their  
18  
19 316 95% confidence intervals (95%CI) were computed.

## 22 317 **Results**

23  
24 318 Mean scale scores are reported in Table 1. The mean levels of occupational stress scores were not  
25  
26 319 particularly high when compared with those of other groups of Italian workers [19]. The average  
27  
28 320 levels of depression, anxiety, emotional exhaustion and depersonalization scores were close to the  
29  
30 321 lower limits of the respective scales, while those of personal accomplishment were high. On the  
31  
32 322 basis of the Italian cut-off levels, only one case of possible anxiety and three cases of possible  
33  
34 323 burnout were observed. However, there were 21 (7.3%) likely cases of mild depression (BDI  $\geq 10$ )  
35  
36 324 and 7 (2.4%) likely cases of moderate depression (BDI  $\geq 16$ ). Given the negligible prevalence of  
37  
38 325 possible anxiety or burnout, we applied the logistic analysis exclusively to depression.

39  
40 326 Hierarchical multiple linear regression allowed us to test the extent to which the level of  
41  
42 327 mental health symptomatology can be predicted on the basis of socio-demographic, occupational,  
43  
44 328 personality and work-related stress data (Table 2).

---

45 329 Insert Table 2 about here

---

46 330 The association between depression and socio-demographic variables (Model 1) was weak  
47  
48 331 (Adjusted  $R^2 = .01$ ) and generally not significant, except for a positive association with length of  
49  
50 332 employment. When personality traits were entered into the model (Model 2), a significant increase

1  
2  
3 333 in Adjusted  $R^2$  was observed, due to the significant negative effect of emotional stability. A further  
4  
5 334 significant increase in the proportion of variance of BDI score accounted for was observed also  
6  
7 335 when DCS and ERI scores were entered (Model 3, 4 and 5). DCS-Control, DCS-Support and ERI-  
8  
9 336 Reward showed a negative effect, whereas ERI-Effort and ERI-Reward showed a positive effect.

10  
11 337 The results of the logistic regression are shown in Table 3.

---

12  
13  
14 338 Insert Table 3 about here

---

15  
16 339 For officers in a state of "distress" according to the DCS model (i.e. those with a simultaneous high  
17  
18 340 level of "demand" and low level of "control"), the risk of being depressed approximately doubled,  
19  
20 341 but not significantly, whereas the other categorical predictors were all statistically significant.  
21  
22 342 Notably, officers with an ERI-Effort/Reward ratio higher than 1 had an approximately 7-fold higher  
23  
24 343 risk of depression than the others.

25  
26  
27 344 The results of regression analyses performed using anxiety as criterion are reported in Table  
28  
29 345 4.

---

30  
31  
32 346 Insert Table 4 about here

---

33  
34 347 Socio-demographical and occupational variables accounted for a negligible proportion of variance  
35  
36 348 of the anxiety score (Model 1), with living in barracks being the only significant predictor. Entering  
37  
38 349 personality traits as further predictors (Model 2) substantially improved the fit of the model, and  
39  
40 350 lower extraversion, agreeableness and emotional stability were associated with higher anxiety  
41  
42 351 levels. The inclusion of DCS and ERI scores as predictors (Models 3-5) further increased the  
43  
44 352 Adjusted  $R^2$ . Results suggested that lower support, higher effort and lower rewards predicted higher  
45  
46 353 anxiety.

47  
48  
49 354 Table 5 reports the results of the regression analyses carried on with MBI scores as criteria.

---

50  
51  
52 355 Insert Table 5 about here

---

1  
2  
3 356 MBI Professional Exhaustion scores were higher in agents (as opposed to supervisors/technical  
4  
5 357 staff) (Model 1) and in officers with lower emotional stability (Model 2), and were associated with  
6  
7 358 higher demand, higher effort, higher over-commitment and lower reward (Models 3-5).

8  
9  
10 359 Depersonalization scores were lower in officers with children (Model 1), in more agreeable and  
11  
12 360 emotionally stable officers (Model 2) and in officers with higher levels of control, support and  
13  
14 361 reward and lower levels of effort and over-commitment (Models 3-5). Personal Accomplishment  
15  
16 362 scores were not related to any socio-demographical and occupational variable (Model 1), but were  
17  
18 363 positively predicted by all personality traits (Model 2). Control was the only stress-related variable  
19  
20 364 to be significantly associated with this scale score.

## 21 22 23 365 **Discussion**

24  
25 366 This study investigated the association between a condition of job distress and the presence of self-  
26  
27 367 reported mental health symptom, in a special police force unit while controlling for socio-  
28  
29 368 demographical, occupational and personality variables. Results from multiple regression analyses  
30  
31 369 showed that socio-demographical and occupational variables accounted for a negligible proportion  
32  
33 370 of variance of mental health problems, although, consistently with a previous study on the same  
34  
35 371 cohort [35] higher length of employment, lower rank, being barracked and not having children were  
36  
37 372 significant predictors of higher symptomatology. Emotional stability was a significant predictor for  
38  
39 373 all the measures of mental health problems, which was expected given the large body of research  
40  
41 374 that has shown that this trait is associated with several mental disorders and physical health  
42  
43 375 problems, and that this is not an artifact of the overlapping of some symptoms with questionnaire  
44  
45 376 items [52]. Lower levels of agreeableness (e.g., hostility) and extraversion were associated with  
46  
47 377 higher anxiety and lower professional accomplishment, consistently with previous studies on the  
48  
49 378 predictive power of these traits for psychological health and occupational outcomes [53]. However,  
50  
51 379 the focus of this study was on the role of job stressors, and results showed that they can account for  
52  
53 380 a further and substantial amount of variance of mental health measures. All ERI scales and all DCS  
54  
55  
56  
57  
58  
59  
60



1  
2  
3 381 scales except demand were significant predictors of depressive symptoms, and results from logistic  
4  
5 382 regression analyses revealed that a higher effort/reward imbalance was associated with an  
6  
7 383 approximately sevenfold increase in risk of depression. These results suggest that, consistently with  
8  
9 384 previous studies, also in the case of special force police officers, a lower autonomy in making  
10  
11 385 decisions, poorer relationships between coworkers and superiors, lower reward opportunities (or  
12  
13 386 higher imbalance between the effort spent to meet the demanding aspects of the work environment  
14  
15  
16 387 and the rewards), a more demanding work environment and a higher commitment can be associated  
17  
18 388 with higher the depressive symptomatology. A recent meta-analysis of studies on the association  
19  
20 389 between stress and mental disorders indicated that psychosocial problems in the workplace, reduced  
21  
22 390 control, job strain, low social support, and the discrepancy between effort and rewards predict the  
23  
24 391 onset of depression [54]. Another review of 14 longitudinal studies reported that lack of social  
25  
26 392 support enhanced depression [55]. The association we found between low reward and symptoms is  
27  
28 393 in agreement with that suggested by neurobiological studies on depression [56].  
29  
30

31  
32 394 Albeit to a lesser extent, the DCS and the ERI model showed a good ability to predict  
33  
34 395 anxiety. Differently from other studies that found that all the three components of the DCS were  
35  
36 396 significant predictors of anxiety [8], in this study only support, i.e., the quality of relationships  
37  
38 397 between coworkers and superiors, was significant, suggesting that this dimension might be play a  
39  
40 398 central role in the development of anxiety in special force police officers. Results for the ERI model  
41  
42 399 were also only partially consistent with the literature which found little predictive power of ERI  
43  
44 400 scales for anxiety [57], since in the cohort under study higher efforts needed to meet the demands of  
45  
46 401 the working environment and lower occupational rewards were associated with higher anxiety.  
47  
48

49 402 As for burnout, all ERI scales proved to be useful in predicting professional exhaustion and  
50  
51 403 depersonalization, since higher effort and over-commitment and lower reward were associated with  
52  
53 404 higher scores, whereas they did not account for a substantial amount of variance or personal  
54  
55 405 accomplishment. At least one DCS scale significantly predicted each burnout dimension (demand  
56  
57  
58  
59  
60

1  
2  
3 406 predicted professional exhaustion, control and support predicted depersonalization, control  
4  
5 407 predicted personal accomplishment).

6  
7 408 Taken together, these results suggest that for special force police officers prediction models  
8  
9 409 that include both the DCS and the ERI scores can provide a substantially greater predictive power  
10  
11 410 for mental health symptoms than models that include only socio-demographical and occupational  
12  
13 411 variables and personality traits. These results are consistent with some of previous studies (e.g.,  
14  
15 412 [58], on engineers) but not with others (e.g., [57] on civil servants), possibly suggesting that the  
16  
17 413 effects of the dimensions of job distress on mental health might be the outcome of a complex  
18  
19 414 interaction among the peculiar features of each occupation and the psychological characteristics of  
20  
21 415 the workers, which necessarily self-select into occupations. In the very case of the officers assessed  
22  
23 416 in this study, poor relationships between coworkers and superiors, higher efforts spent and lower  
24  
25 417 rewards received are likely to elicit mental health problems, whereas the use and development of  
26  
27 418 skills and autonomy in making decisions about the work process and the intrinsic personal factors  
28  
29 419 regarding occupational motivation and participation may play a role for some specific problems.  
30  
31 420 These findings replicate the observations of Martins and Lopes [59] who reported that effort,  
32  
33 421 reward and over-commitment are associated with the presence of common mental disorders among  
34  
35 422 military personnel in peacetime, and those of Kingdom and Smith [60] who showed that ERI was  
36  
37 423 the most important predictor of depression among police officers in the UK Coast Guard. More  
38  
39 424 generally, our results are in agreement with a large body of literature on the relationship between  
40  
41 425 reward processing and depressive symptoms [61]. The DCS model captured some important  
42  
43 426 aspects, such as the lack of control over the organization of work and the lack of support from  
44  
45 427 colleagues or superiors. The role of lack of support from superiors and on the part of the  
46  
47 428 organization to which the worker belongs in the occurrence of depression has already been reported  
48  
49 429 by Berg et al. in the Norwegian police [62], and by Arial et al. [63] in a sample of Swiss police.  
50  
51  
52  
53  
54  
55  
56  
57  
58  
59  
60

1  
2  
3 430 It might be argued that only seven per cent of police officers in our cohort reported a level of  
4  
5 431 depressive symptomatology higher than the risk threshold. In fact, such prevalence is lower than  
6  
7 432 that found by Fox et al. [64] in urban US police officers (9%), by Frühwald et al. [65] in Lower  
8  
9 433 Austria (9%), by Arial et al. [63] in Swiss police officers (11.9%), by Chen et al. [58] in Taiwanese  
10  
11 434 police officers (21.6%), and by Obidoa et al. [66] among US corrections officers (31%), and it is  
12  
13 435 comparable with that found in other working populations [24, 67]. Moreover, a nationwide study in  
14  
15 436 the Norwegian police service showed that the younger police officers reported lower levels of  
16  
17 437 depressive symptoms than the corresponding general population [62]. A recent comparison of  
18  
19 438 police and other employees found no indications that self-reported mental health disturbances are  
20  
21 439 more prevalent among police officers than among groups of employees that are not considered to be  
22  
23 440 high-risk groups [68]. Since our sample was composed of young and highly selected police officers,  
24  
25 441 whose emotional stability was higher than the general population [4], this result is not surprising.  
26  
27 442 However, this does not mean that the problem of depression in this special unit is negligible. It  
28  
29 443 must not be overlooked that depression represents a considerable cost for productivity both in terms  
30  
31 444 of absenteeism and presenteeism [69] and more importantly, given the highly sensitive tasks the  
32  
33 445 officers of this study have to accomplish, it increases the possibility of errors and the risk to the  
34  
35 446 health and safety of others. Police officers with depressive symptoms should therefore be given  
36  
37 447 timely and confidential assistance [70] and the causes of excessive occupational stress should be  
38  
39 448 promptly identified and removed or minimized.  
40  
41  
42  
43  
44

45 449 The results reported in this study should be interpreted with caution. First, as all the  
46  
47 450 measures were self-reported questionnaires, and reporting bias and subjectivity may therefore have  
48  
49 451 distorted the observations. Depressed persons could be more likely to report psychosocial stress at  
50  
51 452 work, even if objectively their work environment is not at risk *per se*. Second, the fact that job  
52  
53 453 distress variables were measured before mental health symptoms supports prediction but not  
54  
55 454 necessarily a causal hypothesis, since mental health symptoms could have been present even *before*  
56  
57  
58  
59  
60

1  
2  
3 455 or *during* the assessment of job distress. Specifically, we could not address the issue of whether the  
4  
5 456 observed reduction in experience of reward is an epiphenomenon of the presence of mental health  
6  
7 457 symptoms. Finally, because our sample corresponds to a specific police unit, and it is a relatively  
8  
9 458 small cohort, our results may not be generalizable to police officers with different occupational  
10  
11 459 exposure, nor to special forces in countries with different ethnic or cultural characteristics.  
12  
13 460 However, our study also has several important strengths. To our knowledge, this is the first study to  
14  
15 461 investigate associations of mental health problems with work stress in terms of both DCS and ERI  
16  
17 462 models in special force police officers while controlling for socio-demographical and occupational  
18  
19 463 variables and personality traits. Such a population has a high exposure to homogenous occupational  
20  
21 464 risks, while many studies include police officers engaged in investigative activities, control of the  
22  
23 465 territory, administrative and office activities and many other very different tasks. The participation  
24  
25 466 rate was very high (99%). Finally, since the measurements used in this study have been validated in  
26  
27 467 several other studies, our results are more comparable with other research findings.  
28  
29  
30

31  
32 468 Limitations notwithstanding, the present findings indicate that some aspects of psychosocial  
33  
34 469 environment at work, such as the imbalance between effort and reward, are associated with  
35  
36 470 depressive symptoms, anxiety and burnout in special force police officers. Although we could not  
37  
38 471 establish a causal relationship and these results need to be replicated in longitudinal studies, they  
39  
40 472 suggest that the dimensions of the DCS and ERI models can be useful in monitoring psychological  
41  
42 473 functioning of special force police officers.  
43  
44  
45 474

475 **References**

- 476 1. Cherry NM, Chen Y, McDonald JC. Reported incidence and precipitating factors of work-  
477 related stress and mental ill-health in the United Kingdom (1996-2001). *Occup Med (Lond)*.  
478 2006;56(6):414-21.
- 479 2. Melchior M, Caspi A, Milne BJ, Danese A, Poulton R, Moffitt TE. Work stress precipitates  
480 depression and anxiety in young, working women and men. *Psychol Med*. 2007;  
481 37(8):1119-29.
- 482 3. Paoli P, Merllié D. European Foundation for the Improvement of Living and Working  
483 Conditions—Third European survey on working conditions. Luxemburg: Office for Official  
484 Publications of the European Communities; 2000.
- 485 4. Garbarino S, Chiorri C, Magnavita N, Piattino S, Cuomo G. Personality profiles of Special  
486 Force police officers. *J Police Crim Psychol* 2012; 27(2): 99-110.
- 487 5. Yuan C, Wang Z, Inslicht SS, McCaslin SE, Metzler TJ, Henn-Haase C, Apfel BA, Tong H,  
488 Neylan TC, Fang Y, Marmar CR. Protective factors for posttraumatic stress disorder  
489 symptoms in a prospective study of police officers. *Psychiatry Res*. 2011; 188(1): 45-50.
- 490  
491 6. Evans R, Pistrang N, Billings J. Police officers' experiences of supportive and unsupportive  
492 social interactions following traumatic incidents. *Eur J Psychotraumatol*. 2013;4. doi:  
493 10.3402/ejpt.v4i0.19696.
- 494 7. Galatzer-Levy IR, Brown AD, Henn-Haase C, Metzler TJ, Neylan TC, Marmar CR. Positive  
495 and Negative Emotion Prospectively Predict Trajectories of Resilience and Distress Among  
496 High-Exposure Police Officers. *Emotion*. 2013 Jan 21. [Epub ahead of print]
- 497 8. Sanne B, Mykletun A, Dahl A, Moen B, Tell G. Testing the job Demand-Control-Support  
498 model with anxiety and depression as outcomes: The Hordaland Health Study. *Occup Med*  
499 (Lond). 2005;55:463–73.

- 1  
2  
3 500 9. Berg AM, Hem E, Lau B, Håseth K, Ekeberg O. Stress in the Norwegian police service.  
4  
5 501 Occup Med (Lond). 2005; 55(2):113-20.  
6  
7 502 10. Violanti JM. Police organizational stress: the impact of negative discipline. Int J Emerg  
8  
9 503 Ment Health. 2011;13(1):31-6.  
10  
11 504 11. Garbarino S, Magnavita N, Elovainio M, Heponiemi T, Ciprani F, Cuomo G, Bergamaschi  
12  
13 505 A. Police job strain during routine activities and a major event. Occup Med (Lond). 2011;  
14  
15 506 61(6):395-9.  
16  
17 507 12. McEwen BS. Stress, adaptation and disease. Allostasis and allostatic load. Ann N Y Acad  
18  
19 508 Sci 1998; 840: 33-44.  
20  
21 509 13. Cooper B. Mental health epidemiology today: a monitor of distress. Epidemiol Psychiatr  
22  
23 510 Sci. 2012;21(2):171-3  
24  
25 511 14. Winwood PC, Peters R, Peters M, Dollard M. Further validation of the psychological injury  
26  
27 512 risk indicator scale. J Occup Environ Med. 2012;54(4):478-84.  
28  
29 513 15. Summerfield D. Metropolitan Police blues: protracted sickness absence, ill health  
30  
31 514 retirement, and the occupational psychiatrist. BMJ. 2011; 342:d2127.  
32  
33 515 16. Karasek RA. Job demands. job decision latitude. and mental strain. Implication for job  
34  
35 516 redesign. Adm Sci Q 1979; 24: 285-308  
36  
37 517 17. Siegrist J. Adverse health effects of high-effort/low-reward conditions. J Occup Health  
38  
39 518 Psychol 1996; 1:27-41  
40  
41 519 18. Rugulies R, Krause N. Job strain, iso-strain, and the incidence of low back and neck injuries.  
42  
43 520 A 7.5-year prospective study of San Francisco transit operators. Soc Sci Med.  
44  
45 521 2005;61(1):27-39.  
46  
47 522 19. Magnavita N, Garbarino S. Social psychiatry in the waiting room. What a physician can  
48  
49 523 learn about occupational stress from workers waiting to be examined. Psychiatry Journal,  
50  
51 524 Volume 2013 (2013), Article ID 701872, 7 pages <http://dx.doi.org/10.1155/2013/701872>  
52  
53  
54  
55  
56  
57  
58  
59  
60

- 1  
2  
3 525 20. Nieuwenhuijsen K, Bruinvels D, Frings-Dresen M. Psychosocial work environment and  
4 stress-related disorders, a systematic review. *Occup Med (Lond)*. 2010; 60(4):277-86.  
5 526  
6  
7 527 21. Marchand A, Blanc ME. The contribution of work and non-work factors to the onset of  
8 psychological distress: an eight-year prospective study of a representative sample of  
9 employees in Canada. *J Occup Health*. 2010; 52(3):176-85.  
10 528  
11 529  
12  
13 530 22. van Rhenen W, van Dijk FJ, Schaufeli WB, Blonk RW. Distress or no distress, that's the  
14 question: A cutoff point for distress in a working population. *J Occup Med Toxicol*. 2008;  
15 531  
16 3:3. doi: 10.1186/1745-6673-3-3.  
17 532  
18  
19 533 23. van der Klink JJ, van Dijk FJ. Dutch practice guidelines for managing adjustment disorders  
20 in occupational and primary health care. *Scand J Work Environ Health*. 2003; 29(6):478-87.  
21 534  
22  
23 535 24. Iversen A, Dyson C, Smith N, et al. Prevalence of mental disorders in Europe: results from  
24 the European Study of the Epidemiology of Mental Disorders (ESEMeD) project. *Acta*  
25 536  
26 537  
27 537  
28 538 25. Bonde JPE. Psychosocial factors at work and risk of depression: a systematic review of the  
29 epidemiological evidence. *Occup Environ Med* 2008; 65: 438-445.  
30 539  
31 540 doi:10.1136/oem.2007.038430  
32 541  
33 542 26. Netterstrøm B, Conrad N, Bech P, Fink P, Olsen O, Rugulies R, Stansfeld S. The relation  
34 between work-related psychosocial factors and the development of depression. *Epidemiol*  
35 543  
36 543  
37 544  
38 544 27. Violanti JM. *Police Suicide: Epidemic in Blue*, 2nd ed., Charles C Thomas Publisher,  
39 Springfield, IL: 2007.  
40 545  
41 546  
42 546 28. Yoo H, Franke WD. Stress and cardiovascular disease risk in female law enforcement  
43 officers. *Int Arch Occup Environ Health*. 2011; 84(3):279-86.  
44 547  
45 548  
46 548 29. von dem Knesebeck O, David K, Siegrist J. Psychosocial stress at work and musculoskeletal  
47 pain among police officers in special forces. *Gesundheitswesen*. 2005; 67(8-9):674-9.  
48 549  
49  
50  
51  
52  
53  
54  
55  
56  
57  
58  
59  
60

- 1  
2  
3 550 30. Bourbonnais R, Jauvin N, Dussault J, Vézina M. Psychosocial work environment,  
4  
5 551 interpersonal violence at work and mental health among correctional officers. *Int J Law*  
6  
7 552 *Psychiatry*. 2007; 30(4-5):355-68.
- 8  
9  
10 553 31. Janzen BL, Muhajarine N, Zhu T, Kelly IW. Effort-reward imbalance, overcommitment,  
11  
12 554 and psychological distress in Canadian police officers. *Psychol Rep*. 2007; 100(2):525-30.
- 13  
14 555 32. Taris TW, Kompier MAJ, Geurts SAE, Houtman ILD, van den Heuvel FFM. Professional  
15  
16 556 efficacy, exhaustion, and work characteristics among police officers: A longitudinal test of  
17  
18 557 the learning-related predictions of the demand-control model. *J Occup Organizat Psychol*  
19  
20 558 2010; 83: 455-474
- 21  
22  
23 559 33. Hall GB, Dollard MF, Tuckey MR, Winefield AH, Thompson BM. Job demands, work-  
24  
25 560 family conflicts, and emotional exhaustion in police officers: a longitudinal test of  
26  
27 561 competing theories. *J Occup Organizat Psychol* 2010; 83: 237-250.
- 28  
29  
30 562 34. Wang Z, Inslicht SS, Metzler TJ, Henn-Haase C, McCaslin SE, Tong H, et al. A prospective  
31  
32 563 study of predictors of depression symptoms in police. *Psychiatry Res*. 2010;175(3):211-6.
- 33  
34 564 35. Garbarino S, Magnavita N, Chiorri C, Brisinda D, Cuomo G, Venuti A, Fenici R.  
35  
36 565 Evaluation of operational stress in riot and crowd control police units: A global challenge  
37  
38 566 for prevention and management of police task-related stress. *J Police Crim Psychol*. 2012;  
39  
40 567 27(2): 111-122 DOI 10.1007/s11896-012-9104-8
- 41  
42  
43 568 36. Magnavita N, Garbarino S. Is absence related to work stress? A repeated cross-sectional  
44  
45 569 study on a special police force. *AJIM* 2013 Jan 17 Published online in Wiley Online Library  
46  
47 570 DOI10.1002/ajim.22155.
- 48  
49  
50 571 37. Garbarino S, Chiorri C, Magnavita N. Personality traits of the Five-Factor Model are  
51  
52 572 associated with work-related stress in special force police officers. *IAOEH* 2013 Mar 6 DOI:  
53  
54 573 10.1007/s00420-013-0861-1
- 55  
56  
57  
58  
59  
60



- 1  
2  
3 574 38. Caprara GV, Barbaranelli C, Borgogni L. BFQ - Big Five Questionnaire: Manuale. Giunti  
4  
5 575 OS, Firenze (Italy) 1993  
6  
7 576 39. Caprara GV, Barbaranelli C, Borgogni L, Perugini M. The Big Five questionnaire: a new  
8  
9 577 questionnaire to assess the five factor model. *Pers Indiv Differ.* 1993; 15:281–288  
10  
11 578 40. Magnavita N. Two tools for health surveillance of job stress: the Karasek Job Content  
12  
13 579 Questionnaire and the Siegrist Effort Reward Imbalance Questionnaire. *G Ital Med Lav*  
14  
15 580 *Ergon* 2007; 29 (3): 667-670  
16  
17 581 41. Courvoisier DS, Perneger TV. Validation of alternative formulations of job strain. *J Occup*  
18  
19 582 *Health* 2010;52:5-13.  
20  
21 583 42. Juniper B, White N, Bellamy P. A new approach to evaluating the well-being of police.  
22  
23 584 *Occup Med (Lond)* 2010;60:560-565. doi: 10.1093/occmed/kqq130.  
24  
25 585 43. Beck AT, Rush AJ, Shaw BF, Emery G. Cognitive therapy of depression. Guilford Press,  
26  
27 586 New York 1979  
28  
29 587 44. Bunevicius A, Staniute M, Brozaitiene J, Pommer AM, Pop VJ, Montgomery SA,  
30  
31 588 Bunevicius R. Evaluation of depressive symptoms in patients with coronary artery disease  
32  
33 589 using the Montgomery Åsberg Depression Rating Scale. *Int Clin Psychopharmacol.*  
34  
35 590 2012;27(5):249-55  
36  
37 591 45. Preljevic VT, Osthus TB, Sandvik L, Opjordsmoen S, Nordhus IH, Os I, Dammen T.  
38  
39 592 Screening for anxiety and depression in dialysis patients: Comparison of the Hospital  
40  
41 593 Anxiety and Depression Scale and the Beck Depression Inventory. *J Psychosom Res.*  
42  
43 594 2012;73(2):139-44.  
44  
45 595 46. Adachi Y, Aleksic B, Nobata R, Suzuki T, Yoshida K, Ono Y, Ozaki N. Combination use of  
46  
47 596 Beck Depression Inventory and two-question case-finding instrument as a screening tool for  
48  
49 597 depression in the workplace. *BMJ Open.* 2012;2(3). pii: e000596.  
50  
51  
52  
53  
54  
55  
56  
57  
58  
59  
60

- 1  
2  
3 598 47. Spielberger CD, Gorsuch RL, Lushene RE, Vagg PR, Jacobs GA. The state-trait anxiety  
4  
5 599 inventory fo adults. Manual. Mind Garden, Palo Alto (CA) 1983  
6  
7 600 48. Sanavio E, Bertolotti G, Michielin P, Vidotto G, Zotti AM. CBA-2.0. Cognitive behavioural  
8  
9 601 assessment 2.0. Scale primarie. Giunti OS, Firenze, 1997.  
10  
11 602 49. Maslach C, Jackson SE. The measurement of experienced burnout. *J Occup Behav* 1981;  
12  
13 603 2:99–113  
14  
15 604 50. Sirigatti S, Stefanile C. MBI. Maslach Burnout Inventory. Adattamento italiano. Giunti OS,  
16  
17 605 Firenze, 1993.  
18  
19 606 51. Violante S, Benso PG, Gerbaudo L, Violante B. Relationship between job satisfaction, and  
20  
21 607 stress, burnout and psychosocial factors among nurses working in different health settings.  
22  
23 608 *G Ital Med Lav Ergon*. 2009;31(1):A36-A44.  
24  
25 609 52. Lahey BB. Public health significance of neuroticism. *Am Psychol*. 2009; 64(4): 241–256.  
26  
27 610 53. Ozer DJ, Benet-Martínez V. Personality and the prediction of consequential outcomes. *Annu*  
28  
29 611 *Rev Psychol*. 2006;57:401-21.  
30  
31 612 54. Stansfeld S, Candy B. Psychosocial work environment and mental health--a meta-analytic  
32  
33 613 review. *Scand J Work Environ Health*. 2006; 32(6):443-62.  
34  
35 614 55. Netterstrøm B, Conrad N, Bech P, Fink P, Olsen O, Rugulies R, Stansfeld S. The relation  
36  
37 615 between work-related psychosocial factors and the development of depression. *Epidemiol*  
38  
39 616 *Rev*. 2008; 30:118-32.  
40  
41 617 56. Eshel N, Roiser JP. Reward and punishment processing in depression. *Biol Psych* 2010;  
42  
43 618 68(2): 118-124. DOI: 10.1016/j.biopsy.2010.01.027  
44  
45 619 57. Griffin JM, Greiner BA, Stansfeld SA, Marmot M. The effect of self-reported and observed  
46  
47 620 job conditions on depression and anxiety symptoms: a comparison of theoretical models. *J*  
48  
49 621 *Occup Health Psych* 2007; 12, 334–349.  
50  
51  
52  
53  
54  
55  
56  
57  
58  
59  
60

- 1  
2  
3 622 58. Chen SW, Wang PC, Hsin PL, Oates A, Sun IW, Liu SI. Job stress models, depressive  
4  
5 623 disorders and work performance of engineers in microelectronics industry. *Int Arch Occup*  
6  
7 624 *Environ Health* 2011; 84(1):91-103.
- 9 625 59. Martins LCX, Lopes CS. Military hierarchy, job stress and mental health in peacetime. *Occ*  
10  
11 626 *Med (Oxford)* 2012; 62: 182-187
- 14 627 60. Kingdom SE, Smith AP. Combined effects of work-related stress in Her Majesty's  
15  
16 628 Coastguard (HMCG). *Int Marit Health*. 2012;63(1):63-70.
- 18 629 61. Eshel N, Roiser JP. Reward and punishment processing in depression. *Biol Psych* 2010;  
19  
20 630 68(2): 118-124. DOI: 10.1016/j.biopsycho.2010.01.027
- 23 631 62. Berg AM, Hem E, Lau B, Ekeberg Ø. An exploration of job stress and health in the  
24  
25 632 Norwegian police service: a cross sectional study. *J Occup Med Toxicol*. 2006 ;1:26.
- 27 633 63. Arial M, Gonik V, Wild P, Danuser B. Association of work related chronic stressors and  
28  
29 634 psychiatric symptoms in a Swiss sample of police officers; a cross sectional questionnaire  
30  
31 635 study. *Int Arch Occup Environ Health* 2010; 83: 323-331.
- 34 636 64. Fox J, Desai MM, Britten K, Lucas G, Luneau R, Rosenthal MS. Mental-health conditions,  
35  
36 637 barriers to care, and productivity loss among officers in an urban police department. *Conn*  
37  
38 638 *Med*. 2012;76(9):525-31.
- 40 639 65. Frühwald S, Entenfellner A, Grill W, Korbelt C, Frottier P. Raising awareness about  
41  
42 640 depression together with service users and relatives - results of workshops for police officers  
43  
44 641 in Lower Austria. *Neuropsychiatr*. 2011;25(4):183-91.
- 47 642 66. Obidoa C, Reeves D, Warren N, Reisine S, Cherniack M. Depression and work family  
48  
49 643 conflict among corrections officers. *J Occup Environ Med*. 2011;53(11):1294-301.
- 51 644 67. Pflanz SE, Ogle AD. Job stress, depression, work performance, and perceptions of  
52  
53 645 supervisors in military personnel. *Mil Med*. 2006;171(9):861-5.

- 1  
2  
3 646 68. van der Velden PG, Rademaker AR, Vermetten E, Portengen MA, Yzermans JC, Grievink  
4  
5 647 L. Police officers: a high-risk group for the development of mental health disturbances? A  
6  
7 648 cohort study. *BMJ Open*. 2013 Jan 24;3(1). doi:pii: e001720. 10.1136/bmjopen-2012-  
8  
9 649 001720  
10  
11 650 69. Lee YM . Loss of productivity due to depression among Korean employees *J Occup Health*  
12  
13 651 2010; 52: 389-394.  
14  
15  
16 652 70. Berking M, Meier C, Wupperman P. Enhancing emotion-regulation skills in police officers:  
17  
18 653 results of a pilot controlled study. *Behav Ther*. 2010;41(3):329-339.  
19  
20  
21  
22  
23  
24  
25  
26  
27  
28  
29  
30  
31  
32  
33  
34  
35  
36  
37  
38  
39  
40  
41  
42  
43  
44  
45  
46  
47  
48  
49  
50  
51  
52  
53  
54  
55  
56  
57  
58  
59  
60

1  
2  
3 1 Table 1. Socio-demographical and occupational characteristics, personality scores, occupational  
4 2 stress scores and mental health scores of the participants in this study (n=289)

| <i>Variable</i>                                          | <i>Statistics</i> |
|----------------------------------------------------------|-------------------|
| <i>Socio-demographical variables</i>                     |                   |
| Age, years ( <i>M±DS</i> )                               | 35.4±7.5          |
| Length of service, years ( <i>M±DS</i> )                 | 14.0±7.9          |
| Rank, superintendent or technical staff, frequency (%)   | 140 (48.4)        |
| Education level, high school or higher, frequency (%)    | 217 (75.1)        |
| Origin, Northern Italy, frequency (%)                    | 145 (50.2)        |
| Living in barracks, frequency (%)                        | 162 (56.1)        |
| Married or cohabiting, frequency (%)                     | 108 (37.4)        |
| <i>Personality variables</i>                             |                   |
| BFQ-Energy/Extraversion ( <i>M±DS</i> )                  | 52.9±8.3          |
| BFQ-Friendliness/Agreeableness ( <i>M±DS</i> )           | 55.3±10.5         |
| BFQ-Conscientiousness ( <i>M±DS</i> )                    | 52.6±8.6          |
| BFQ-Emotional Stability ( <i>M±DS</i> )                  | 62.0±8.2          |
| BFQ-Openness ( <i>M±DS</i> )                             | 51.2±9.1          |
| <i>Occupational stress variables</i>                     |                   |
| DCS-Demand ( <i>M±DS</i> ) (range 5-20)                  | 13.4±2.02         |
| DCS-Control ( <i>M±DS</i> ) (range 6-24)                 | 13.3±2.7          |
| DCS-Support ( <i>M±DS</i> ) (range 6-24)                 | 18.6±2.9          |
| DCS-Job Strain (Demand/Control ratio) ( <i>M±DS</i> )    | 1.31±0.41         |
| ERI-Effort ( <i>M±DS</i> ) (range 6-30)                  | 15.0±3.2          |
| ERI-Reward ( <i>M±DS</i> ) (range 11-55)                 | 42.3±6.2          |
| ERI-Over-commitment ( <i>M±DS</i> ) (range 6-24)         | 6.9±1.9           |
| ERI-Weighted Effort/Reward ratio( <i>M±DS</i> )          | 0.70±0.28         |
| <i>Mental health variables</i>                           |                   |
| BDI ( <i>M±DS</i> ) (range 0-63)                         | 3.3±4.2           |
| STAI-T ( <i>M±DS</i> ) (range 20-50)                     | 27.5±4.3          |
| MBI-Emotional Exhaustion ( <i>M±DS</i> ) (range 9-36)    | 17.4±7.9          |
| MBI-Depersonalization ( <i>M±DS</i> ) (range 5-35)       | 9.3±4.5           |
| MBI-Personal Accomplishment ( <i>M±DS</i> ) (range 8-56) | 42.7±9.8          |

3 Note: M=mean; SD=standard deviation; BFQ: Big Five Questionnaire<sup>38,39</sup>; DCS: Demand-Control-  
4 Support Questionnaire<sup>16,40</sup>; ERI: Effort-Reward Imbalance Questionnaire<sup>17,40</sup>; BDI: Beck  
5 Depression Inventory<sup>43,44</sup>; STAI-T: State-Trait Anxiety Inventory-Trait<sup>48,49</sup>; MBI: Maslach Burnout  
6 Inventory<sup>50,51</sup>  
7

Table 2. Standardized regression coefficients ( $\beta$ s) for control socio-demographic variables, personality and occupational stress variables as predictors of Beck Depression Inventory scores.

| Predictor                            | Model 1 | Model 2 | Model 3 | Model 4 | Model 5 |
|--------------------------------------|---------|---------|---------|---------|---------|
| <i>Control variables</i>             |         |         |         |         |         |
| Length of employment (years)         | .12*    | .08     | .10     | .11     | .14*    |
| Rank                                 | -.06    | -.06    | -.06    | -.02    | -.01    |
| Education                            | .07     | .08     | .09     | .08     | .09     |
| Origin                               | -.03    | -.03    | -.05    | -.03    | -.05    |
| Marital status                       | -.02    | -.01    | .02     | .00     | .03     |
| Barracked                            | -.10    | -.12*   | -.11    | -.10    | -.07    |
| Children                             | -.03    | -.03    | -.02    | -.02    | -.01    |
| <i>Personality variables</i>         |         |         |         |         |         |
| BFQ-Energy/Extraversion              |         | -.07    | -.07    | -.07    | -.06    |
| BFQ-Friendliness/Agreeableness       |         | -.08    | -.08    | -.08    | -.09    |
| BFQ-Conscientiousness                |         | -.05    | -.05    | -.05    | -.05    |
| BFQ-Emotional Stability              |         | -.23*** | -.22*** | -.22*** | -.21*** |
| BFQ-Openness                         |         | .00     | .00     | .00     | .00     |
| <i>Occupational stress variables</i> |         |         |         |         |         |
| DCS-Demand                           |         |         | .08     |         | .08     |
| DCS-Control                          |         |         | -.10    |         | -.13*   |
| DCS-Support                          |         |         | -.17**  |         | -.16**  |
| ERI-Effort                           |         |         |         | .16**   | .16**   |
| ERI-Reward                           |         |         |         | -.21*** | -.21*** |
| ERI-Over-commitment                  |         |         |         | .16**   | .16**   |
| Adjusted $R^2$                       | .01     | .06**   | .09***  | .14***  | .18***  |

Note: Rank: Agent ('agent' or 'first class agent')=0, Other=1; Education: High school or higher=0, Lower than high school=1; Origin: Northern Italy=0, Southern Italy=1; Marital Status: single or divorced=0, Married or cohabiting=1; Barracked: No=0, Yes=1; Children: No=0, Yes=1; BFQ: Big Five Questionnaire<sup>38,39</sup>; DCS: Demand-Control-Support Questionnaire<sup>16,40</sup>; ERI: Effort-Reward Imbalance Questionnaire<sup>17,40</sup>; BDI: Beck Depression Inventory<sup>43,44</sup>; STAI-T: State-Trait Anxiety Inventory-Trait<sup>48,49</sup>; MBI: Maslach Burnout Inventory<sup>50,51</sup>  
 $n = 289$ ; \* =  $p < .05$ ; \*\* =  $p < .01$ ; \*\*\* =  $p < .001$ ;

19 Table 3. Odds ratios (ORs) for the association between risk of major depression (Beck Depression  
 20 Inventory score  $\geq 10$ ) and occupational stress indicators, unadjusted and adjusted<sup>^</sup>

| <i>Occupational stress variable</i>                                   | <i>Prevalence—cases<br/>n (%)</i> | <i>Unadjusted<br/>OR (95%CI)</i> | <i>Adjusted<br/>OR (95%CI)</i> |
|-----------------------------------------------------------------------|-----------------------------------|----------------------------------|--------------------------------|
| DCS-Job strain (weighted Demand/Control ratio > 1)                    | 73 (25.3)                         | 1.92 (0.76-4.84)                 | 3.06 (0.97-9.66)               |
| Social isolation (DCS-Support score below the median)                 | 154 (53.3)                        | 3.01 (1.07-8.46)*                | 2.80 (0.88-8.87)               |
| Isostrain (Job strain+Social isolation)                               | 50 (17.3)                         | 2.62 (0.99-6.86)                 | 3.47 (1.08-11.10)*             |
| ERI-Effort/Reward imbalance (Effort/Reward ratio >1)                  | 32 (11.1)                         | 6.26 (2.36-16.59)***             | 7.89 (2.32-26.82)***           |
| ERI- Over-Involvement in work (Overcommitment score above the median) | 37 (12.8)                         | 3.06 (1.11-8.46)*                | 3.27 (1.01-10.63)*             |

21 Note:  $n = 289$ ; <sup>^</sup>: adjustments were made for age, length of employment, rank, education level,  
 22 origin, being married or cohabiting, living in barracks, having children, and personality scores;  
 23 \* =  $p < .05$ ; \*\* =  $p < .01$ ; \*\*\* =  $p < .001$ ;

24

Table 4. Standardized correlation coefficients (beta) for control socio-demographic variables, personality and occupational stress variables as predictors of State-Trait Anxiety Inventory-Trait scores.

| Predictor                            | Model 1 | Model 2 | Model 3 | Model 4 | Model 5 |
|--------------------------------------|---------|---------|---------|---------|---------|
| <i>Control variables</i>             |         |         |         |         |         |
| Length of employment (years)         | .08     | .02     | .03     | .04     | .06     |
| Rank                                 | .06     | .06     | .05     | .10     | .09     |
| Education                            | .03     | .01     | .01     | .01     | .01     |
| Origin                               | -.07    | -.07    | -.09    | -.07    | -.09    |
| Marital status                       | .02     | .03     | .05     | .04     | .06     |
| Barracked                            | .13*    | .10     | .10     | .12*    | .12*    |
| Children                             | -.06    | -.07    | -.07    | -.05    | -.05    |
| <i>Personality variables</i>         |         |         |         |         |         |
| BFQ-Energy/Extraversion              |         | -.13*   | -.13*   | -.13*   | -.13*   |
| BFQ-Friendliness/Agreeableness       |         | -.13*   | -.13*   | -.13*   | -.13*   |
| BFQ-Conscientiousness                |         | -.04    | -.04    | -.05    | -.05    |
| BFQ-Emotional Stability              |         | -.33*** | -.33*** | -.32*** | -.32*** |
| BFQ-Openness                         |         | -.09    | -.09    | -.10    | -.10    |
| <i>Occupational stress variables</i> |         |         |         |         |         |
| DCS-Demand                           |         |         | .01     |         | .01     |
| DCS-Control                          |         |         | -.03    |         | -.05    |
| DCS-Support                          |         |         | -.19*** |         | -.18*** |
| ERI-Effort                           |         |         |         | .19***  | .19***  |
| ERI-Reward                           |         |         |         | -.15**  | -.15**  |
| ERI-Over-commitment                  |         |         |         | .05     | .05     |
| Adjusted R <sup>2</sup>              | .01     | .15***  | .18***  | .20***  | .23***  |

Note: Rank: Agent ('agent' or 'first class agent')=0, Other=1; Education: High school or higher=0, Lower than high school=1; Origin: Northern Italy=0, Southern Italy=1; Marital Status: single or divorced=0, Married or cohabiting=1; Barracked: No=0, Yes=1; Children: No=0, Yes=1; BFQ: Big Five Questionnaire<sup>38,39</sup>; DCS: Demand-Control-Support Questionnaire<sup>16,40</sup>; ERI: Effort-Reward Imbalance Questionnaire<sup>17,40</sup>; BDI: Beck Depression Inventory<sup>43,44</sup>; STAI-T: State-Trait Anxiety Inventory-Trait<sup>48,49</sup>; MBI: Maslach Burnout Inventory<sup>50,51</sup>  
 $n = 289$ ; \* =  $p < .05$ ; \*\* =  $p < .01$ ; \*\*\* =  $p < .001$ ;



37 Table 5. Standardized correlation coefficients (beta) for control socio-demographic variables,  
 38 personality and occupational stress variables as predictors of MBI - Maslach Burnout Inventory  
 39 professional exhaustion, depersonalization, and personal accomplishment scores.

| <i>Predictor</i>                     | <i>Model 1</i> | <i>Model 2</i> | <i>Model 3</i> | <i>Model 4</i> | <i>Model 5</i> |
|--------------------------------------|----------------|----------------|----------------|----------------|----------------|
| Professional Exhaustion              |                |                |                |                |                |
| <i>Control variables</i>             |                |                |                |                |                |
| Length of employment (years)         | .13*           | .09            | .10            | .12*           | .14**          |
| Rank                                 | -.20***        | -.20***        | -.20***        | -.14**         | -.14*          |
| Education                            | .06            | .07            | .07            | .05            | .06            |
| Origin                               | -.02           | -.02           | -.04           | -.02           | -.03           |
| Marital status                       | -.05           | -.05           | -.03           | -.04           | -.01           |
| Barracked                            | -.05           | -.08           | -.07           | -.04           | -.03           |
| Children                             | -.09           | -.09           | -.09           | -.08           | -.08           |
| <i>Personality variables</i>         |                |                |                |                |                |
| BFQ-Energy/Extraversion              |                | -.10           | -.09           | -.09           | -.09           |
| BFQ-Friendliness/Agreeableness       |                | -.08           | -.08           | -.09           | -.09           |
| BFQ-Conscientiousness                |                | -.04           | -.04           | -.04           | -.04           |
| BFQ-Emotional Stability              |                | -.23***        | -.22***        | -.21***        | -.21***        |
| BFQ-Openness                         |                | .04            | .03            | .03            | .03            |
| <i>Occupational stress variables</i> |                |                |                |                |                |
| DCS-Demand                           |                |                | .12*           |                | .12*           |
| DCS-Control                          |                |                | -.07           |                | -.09           |
| DCS-Support                          |                |                | -.09           |                | -.08           |
| ERI-Effort                           |                |                |                | .21***         | .21***         |
| ERI-Reward                           |                |                |                | -.16**         | -.16**         |
| ERI-Over-commitment                  |                |                |                | .27***         | .27***         |
| Adjusted $R^2$                       | .05**          | .11***         | .13***         | .24***         | .26***         |
| Depersonalization                    |                |                |                |                |                |
| <i>Control variables</i>             |                |                |                |                |                |
| Length of employment (years)         | .08            | .03            | .05            | .06            | .09            |
| Rank                                 | -.08           | -.06           | -.06           | -.02           | -.01           |
| Education                            | .00            | .00            | .01            | .00            | .02            |
| Origin                               | -.02           | -.04           | -.06           | -.03           | -.05           |
| Marital status                       | -.09           | -.06           | -.04           | -.05           | -.03           |
| Barracked                            | -.05           | -.07           | -.06           | -.04           | -.03           |
| Children                             | -.18**         | -.16**         | -.16**         | -.15**         | -.14**         |
| <i>Personality variables</i>         |                |                |                |                |                |
| BFQ-Energy/Extraversion              |                | .08            | .08            | .08            | .09            |
| BFQ-Friendliness/Agreeableness       |                | -.23***        | -.24***        | -.24***        | -.24***        |
| BFQ-Conscientiousness                |                | -.02           | -.02           | -.02           | -.03           |
| BFQ-Emotional Stability              |                | -.24***        | -.24***        | -.23***        | -.23***        |
| BFQ-Openness                         |                | -.02           | -.02           | -.02           | -.02           |
| <i>Occupational stress variables</i> |                |                |                |                |                |
| DCS-Demand                           |                |                | .03            |                | .03            |

|                     |      |        |        |         |         |
|---------------------|------|--------|--------|---------|---------|
| DCS-Control         |      |        | -.09   |         | -.12*   |
| DCS-Support         |      |        | -.17** |         | -.17*** |
| ERI-Effort          |      |        |        | .16**   | .16**   |
| ERI-Reward          |      |        |        | -.23*** | -.24*** |
| ERI-Over-commitment |      |        |        | .14**   | .14**   |
| Adjusted $R^2$      | .03* | .14*** | .17*** | .23***  | .26***  |

---

### Personal Accomplishment

#### Control variables

|                              |      |      |      |      |       |
|------------------------------|------|------|------|------|-------|
| Length of employment (years) | .06  | .09  | .05  | .08  | .03   |
| Rank                         | .01  | -.02 | -.05 | -.05 | -.08  |
| Education                    | .01  | .03  | -.01 | .04  | .00   |
| Origin                       | .09  | .08  | .09  | .08  | .09   |
| Marital status               | .11  | .06  | .04  | .06  | .03   |
| Barracked                    | -.09 | -.06 | -.10 | -.07 | -.11* |
| Children                     | .05  | .03  | .01  | .03  | .00   |

#### Personality variables

|                                |  |        |        |        |        |
|--------------------------------|--|--------|--------|--------|--------|
| BFQ-Energy/Extraversion        |  | .15**  | .14**  | .15**  | .14**  |
| BFQ-Friendliness/Agreeableness |  | .26*** | .27*** | .26*** | .27*** |
| BFQ-Conscientiousness          |  | .23*** | .24*** | .23*** | .24*** |
| BFQ-Emotional Stability        |  | .18*** | .17**  | .18**  | .16**  |
| BFQ-Openness                   |  | .17**  | .16**  | .17**  | .16**  |

#### Occupational stress variables

|                     |  |  |        |      |        |
|---------------------|--|--|--------|------|--------|
| DCS-Demand          |  |  | -.02   |      | -.02   |
| DCS-Control         |  |  | .19*** |      | .20*** |
| DCS-Support         |  |  | .03    |      | .02    |
| ERI-Effort          |  |  |        | -.08 | -.09   |
| ERI-Reward          |  |  |        | .06  | .07    |
| ERI-Over-commitment |  |  |        | -.09 | -.10   |

|                |     |        |        |        |        |
|----------------|-----|--------|--------|--------|--------|
| Adjusted $R^2$ | .01 | .20*** | .23*** | .21*** | .24*** |
|----------------|-----|--------|--------|--------|--------|

Note: Rank: Agent ('agent' or 'first class agent')=0, Other=1; Education: High school or higher=0, Lower than high school=1; Origin: Northern Italy=0, Southern Italy=1; Marital Status: single or divorced=0, Married or cohabiting=1; Barracked: No=0, Yes=1; Children: No=0, Yes=1; BFQ: Big Five Questionnaire<sup>38,39</sup>; DCS: Demand-Control-Support Questionnaire<sup>16,40</sup>; ERI: Effort-Reward Imbalance Questionnaire<sup>17,40</sup>; BDI: Beck Depression Inventory<sup>43,44</sup>; STAI-T: State-Trait Anxiety Inventory-Trait<sup>48,49</sup>; MBI: Maslach Burnout Inventory<sup>50,51</sup>  
 $n = 289$ ; \* =  $p < .05$ ; \*\* =  $p < .01$ ; \*\*\* =  $p < .001$ ;

1  
2  
3  
4  
5  
6  
7  
8  
9  
10  
11  
12  
13  
14  
15  
16  
17  
18  
19  
20  
21  
22  
23  
24  
25  
26  
27  
28  
29  
30  
31  
32  
33  
34  
35  
36  
37  
38  
39  
40  
41  
42  
43  
44  
45  
46  
47  
48  
49  
50  
51  
52  
53  
54  
55  
56  
57  
58  
59  
60

Association of work-related stress with ~~depression-mental health problems~~ symptoms in a special police force ~~unit. A cross-sectional study.~~

Formatted: English (U.K.)

Sergio Garbarino <sup>1,2</sup>, Giovanni Cuomo <sup>2</sup>, Carlo Chiorri <sup>3</sup>, Nicola Magnavita <sup>4</sup>.

- 1. State Police Health Service Department, Ministry of the Interior, Rome, Italy
- 2. Department of Neuroscience, Ophthalmology and Genetics, University of Genoa, Genoa, Italy
- 3. Department of Educational Sciences, Psychology Unit, University of Genoa, Genoa, Italy
- 4. Department of Public Health, Occupational Health Unit, Università Cattolica del Sacro Cuore, Largo Gemelli 8, 00168 Roma, Italy. e-mail: nicolamagnavita@gmail.com

Correspondence to: N. Magnavita. Tel. +39-347-3300367, Fax: +39-06-61909399, e-mail [nicolamagnavita@gmail.com](mailto:nicolamagnavita@gmail.com); [nmagnavita@rm.unicatt.it](mailto:nmagnavita@rm.unicatt.it)

Formatted: Italian (Italy)

Formatted: Italian (Italy)

Formatted: Italian (Italy)

Field Code Changed

Field Code Changed

Formatted: Italian (Italy)

Formatted: Italian (Italy)

Type of contribution: Original

Running title: Stress and ~~depression-mental health~~ in police

Word count: 4475 words

Abstract, word count: 280

Tables: 3

Supplementary Tables: 4

Figures: 0

1  
2  
3  
4  
5  
6  
7 29 **Funding:** This research received no specific grant from any funding agency in the public,  
8  
9 30 commercial or not-for-profit sectors.  
10

11 31  
12  
13 32 **Competing interest:** none declared. A complete declaration on competing interest will be signed  
14  
15 33 by all authors before the publication of the paper.  
16

17 34  
18 35 **Author's contribution:** SG carried out medical examinations on workers, CC administered the  
19  
20 36 psychological tests and revised statistics, NM carried out the statistical analyses and drafted the  
21  
22 37 work, GC revised the work.  
23

24 38  
25 39 **Data sharing statement:** Technical appendix, statistical code, and dataset available from the  
26  
27 40 corresponding author at Dryad repository, who will provide a permanent, citable and open access  
28  
29 41 home for the dataset.  
30

## Abstract

**Objectives.** Law and order enforcement tasks may expose special force police officers to significant psychosocial risk factors, ~~so that some of them may find themselves in conditions of distress, which, in turn, may increase the possibility of errors or inappropriate behavior and thus jeopardize the health and safety of others.~~ The aim of this work is to investigate the relationship between job stress and the presence of symptoms of depression/mental health symptoms while controlling for socio-demographical, occupational and personality variables and other psychological problems in special force police officers.

**Method:** At different time points, 292 out of 294 members of the 'VI Reparto Mobile' ~~Genoa~~ 'Mobile', a special police force engaged exclusively in the enforcement of law and order, responded to our invitation to complete a questionnaire/questionnaires for the assessment of personality traits, work-related stress, (using the demand-control-support (DCS) and the effort-reward-imbalance (ERI) models), and for a screening of mental disorders/health problems such as, including depression (Beck Depression Inventory, BDI), anxiety (State Trait Anxiety Inventory Trait, STAI-T), and burnout (Maslach Burnout Inventory, MBI).

**Results:** Regression analyses showed that lower levels of support and reward and higher levels of effort and overcommitment were associated with higher levels of mental health symptoms.

Psychological screening revealed 21 (7.3%) likely cases of mild depression ( $BDI \geq 10$ ), ~~but no cases of possible anxiety or burnout.~~ ~~Lower reward significantly predicted higher depressive symptomatology, and police officers who had experienced a discrepancy between work effort and rewards showed a marked increase in the risk of depression (OR 7.00-89 95% CI 2.32-26.824.76-10.30)~~ when compared with their counterparts who did not perceive themselves to be in a condition of distress.

1  
2  
3  
4  
5  
6  
7 67 **Conclusions:** [The findings of this study suggest that self-reported work-related stress may play a](#)  
8  
9 68 [role in the development of mental health problems in police officers.](#) The prevalence of ~~depressive~~  
10  
11 69 [mental health](#) symptoms in the cohort ~~of police officers investigated here we observed~~ was low, but  
12  
13 70 not negligible [in the case of depression](#). Since special forces police officers have to perform  
14  
15 71 sensitive tasks for which a healthy psychological functioning is needed, the results of this study  
16  
17 72 suggest that steps should be taken to prevent distress and improve the mental well-being of these  
18  
19 73 workers.

20 74  
21  
22 75 **Keywords:** effort-reward imbalance, depression, distress, job strain, mental health, over-  
23  
24 76 commitment, police, social support, work-related stress.

#### 25 26 77 27 28 78 **Article summary**

##### 29 30 79 *'Article focus'*

31  
32 80 Mental health in special police forces is a critical issue. Police officers are exposed to acute and  
33  
34 81 chronic stress and may ~~become depressed~~ [develop mental health problems](#). The impairment of  
35  
36 82 police officers' psychological functioning can be a serious threat to the safety of the public.

##### 37 83 38 39 84 *'Key messages'*

40  
41 85 The prevalence of ~~depression~~ [mental health problems](#) in ~~special force~~ [special police forces](#) ~~officers~~  
42  
43 86 is lower than that of the general population and other groups of police ~~officers~~. ~~Although prevalence~~  
44  
45 87 ~~rates were low, a positive association between distress~~ [job distress](#) (or job stress) [measures](#) and  
46  
47 88 ~~depressive~~ [mental health](#) symptoms was found. The prevention of distress and the treatment of  
48  
49 89 ~~depressive~~ [mental health](#) disorders among police officers are necessary for the safety of the workers  
50  
51 90 themselves and the public.

1  
2  
3  
4  
5  
6  
7  
8  
9  
10  
11  
12  
13  
14  
15  
16  
17  
18  
19  
20  
21  
22  
23  
24  
25  
26  
27  
28  
29  
30  
31  
32  
33  
34  
35  
36  
37  
38  
39  
40  
41  
42  
43  
44  
45  
46  
47  
48  
49  
50  
51  
52  
53  
54  
55  
56  
57  
58  
59  
60

92 *'Strengths and limitations of this study'*

93 This is the first study to investigate the association of "job distress" with [depressive mental health](#)  
94 symptoms in a special force police unit. It has a high participation rate. ~~It is a cross-sectional~~  
95 ~~study.~~ [The study has been](#) conducted on a relatively small cohort, and with only self-report  
96 measures. .

For peer review only

Formatted: details, Justified, Indent: First line: 0"

## Introduction

It is generally agreed that mental health disorders have a multifactorial etiology and, in the last few decades, research has focused on the role of working conditions in determining people's mental health [1, 2]. In fact, workers themselves often report that their work affects their health [3] and intangible costs arising from the suffering of workers are being added to direct financial costs due to absenteeism, presenteeism, reduced productivity and compensation). ~~Alongside the ethical reasons for action, there are also important economic considerations that indicate the need for preventing mental health conditions. Skilled workers with qualifications acquired through expensive training and long experience are the most important asset of any company, i.e., their human capital. The premature loss of these workers due to psychological problems or illness is an economic as well as a human drama.~~

~~In modern society, work is not just a way of earning money, it is also a crucial element in the social status of an individual and a source of meaning in his/her life, leading to a very high level of commitment and identification with the individual's work and organization he/she belongs to. This is especially true for high level professionals such as Ppolice officers operating in special force units engaged in law enforcement and riot control are. It is generally thought that this a category of workers that is considered is particularly at risk for the development of mental health disturbances because of the possible exposure to violent events and traumas and hence to post-traumatic stress disorder, but in fact traumatic accidents rarely occur. On the other hand, However, the long term effect of the psychological stress due to the constant risk of being injured, wounded or even killed while on patrol and to the witnessing of violence and death such exposure tends to be overlooked.~~

~~T~~This may not be immediately perceived as detrimental, but it can still induce maladaptive reactions [3]. Although it has been shown that police officers are more resilient to stress than

Formatted: details, Justified, Indent: First line: 0"



1  
2  
3  
4  
5  
6  
7 123 | civilians [4-7], several ~~cross-sectional~~ studies have provided evidence that adverse work conditions  
8  
9 124 | are related to poor mental health outcomes (e.g., [8]). In addition to these operational work-related  
10  
11 125 | challenges, police officers may be exposed to organizational problems that are common within  
12  
13 126 | hierarchical, male-dominated paramilitary structures such as fire-fighting, ambulance and  
14  
15 127 | paramedic services [9-10]. ~~Paradoxically~~ Ironically, daily organizational stressors may be more  
16  
17 128 | challenging than operational experiences, as shown by a recent study in which reported levels of  
18  
19 129 | perceived stress in a group of police officers were higher during routine jobs than during a high-risk  
20  
21 130 | public event [11].

**Comment [SJD1]:** Inserirei la citazione del paper di Rademaker [66].

22 131 | Both a dramatic violent event and a repeated and prolonged series of administrative events can  
23  
24 132 | cause an allostatic load, i.e., a neurobiological maladaptive reaction due to being forced to adapt to  
25  
26 133 | challenging environments characterized by behavioral and emotional changes known as "distress"  
27  
28 134 | [12]. Through interaction with many different individual factors, distress can induce the occurrence  
29  
30 135 | of mental disorders such as anxiety, depression, burnout, conversion disorder and other conditions  
31  
32 136 | classified in DSM IV [13]. Psychological dysfunction resulting from job distress can be a gradual  
33  
34 137 | and progressive process that impairs well-being over time. This gradual evolution often leaves the  
35  
36 138 | worker unaware of the problem, or unwilling to acknowledge its importance, at least until the  
37  
38 139 | severity of the symptoms makes it clear to colleagues, family, or both. The recognition of emotional  
39  
40 140 | problems due to work-related distress is rarely, if ever, encouraged in the law enforcement sector,  
41  
42 141 | since it is considered a sign of weakness [14]. Consequently, police officers fail to seek professional  
43  
44 142 | help early enough to prevent diagnosis and quickly benefit from treatment. This is one of the main  
45  
46 143 | reasons for which mental disorders are the leading cause of retirement in the police force [15].

**Formatted:** details, Justified, Indent: First line: 0", Tab stops: Not at 4.43"

47 144 |  
48  
49 145 | The two leading models that have been used to describe and explain individual perception of stress  
50  
51 146 | factors are the Demand/Control/Support (DCS) model, developed by Karasek [16], and the  
52  
53 147 | Effort/Reward Imbalance (ERI) model, developed by Siegrist [17]. The DCS model assumes that

**Formatted:** details, Justified, Indent: First line: 0"

**Formatted:** details, Justified, Indent: First line: 0", Tab stops: Not at 4.43"

1  
2  
3  
4  
5  
6  
7 148 the primary sources of job stress, or "job strain", stem from two basic characteristics of the job  
8  
9 149 itself: "job demand" and "job control". The model predicts that job strain is not simply a function of  
10  
11 150 job demand, but also depends on the amount of control the worker has over the work. Job demand  
12  
13 151 takes into consideration the pace and intensity of work: work overload, degree of difficulty,  
14  
15 152 available time, time allotted to executing tasks and the existence of contradictory or conflicting  
16  
17 153 orders. Job decision latitude, or job control, refers to the worker's ability to control his own  
18 154 activities and skill usage. Social support at work, a moderating factor of job strain, was  
19  
20 155 subsequently included in the model. According to this model, high psychological demands in  
21  
22 156 conjunction with low decision latitude can contribute to the development of psychological  
23  
24 157 problems, and workers with high job strain and low social support at work are thought to be the  
25  
26 158 most vulnerable to negative health effects (the so-called "isolated strain", or "isostrain", hypothesis  
27  
28 159 [[Rugulies & Krause, Amick et al.](#)]).

29  
30 160 The ERI model puts emphasis more on the reward rather than the control structure of work,  
31  
32 161 suggesting that mental distress and its health correlates arise when a high degree of effort is not  
33  
34 162 adequately rewarded in the form of pay, esteem, status consistency or career opportunities. A  
35 163 further assumption of this model involves individual differences in the perception of effort-reward  
36  
37 164 imbalance: people with a motivational pattern of excessive work-related commitment and high need  
38  
39 165 for approval (over-commitment) are at increased risk of strain, and, consequently, health problems  
40  
41 166 [17]. The Karasek model (DCS), developed in the 1960s, appears to be more suitable for the  
42  
43 167 physical aspects of occupational stress, while Siegrist's model (ERI), designed for the tertiary  
44  
45 168 society of the 1980s, is more sensitive to stress arising from work relations and organizational  
46  
47 169 factors [18].

48  
49 170 Unfortunately, in literature there is no agreed definition of "distress", although there is some  
50  
51 171 consensus in considering it as an unfavorable and unpleasant response to stress. Due to such a  
52  
53 172 vague definition, the prevalence of workers with distress in published studies can range from 5% to

1  
2  
3  
4  
5  
6  
7 173 50% [19-21]. When distress reaches clinical relevance it is defined as "stress-related disorder". This  
8  
9 174 term includes a variety of clinical conditions, which are collectively labeled as "common mental  
10  
11 175 disorders" (CMD) [22] and one of the most common diagnoses is depression [28]. However, a  
12  
13 176 systematic review of evidence on psychosocial factors at work and depression revealed a high  
14  
15 177 degree of study heterogeneity [23], although other studies found moderate evidence of a  
16  
17 178 relationship between the psychological demands of a job and the development of depression, with  
18  
19 179 relative risks of approximately 2.0 [24]. ~~The prevalence of CMDs in the US armed forces is 27%~~  
20 180 ~~[25], and a similar prevalence has been reported in the UK armed forces [26, 27].~~ Distress and  
21  
22 181 mental health problems caused by work can affect the performance of professional activity,  
23  
24 182 especially in a sensitive area such as law enforcement, ~~in which workers have weapons.~~ The  
25  
26 183 consequences of stress on the mental health of police officers can thus be particularly serious not  
27  
28 184 only for the increased risk of individual health problems, and but also on account of the increased  
29  
30 185 risk of impaired work performance that could jeopardize the safety and health of the general  
31  
32 186 population. For instance, One of the most common diagnoses is depression [28] and, as reported  
33  
34 187 by Violanti [29], depression can be a contributing factor not only in early retirement, but also in  
35  
36 188 police officer suicides, murder-suicides, domestic violence, unnecessary violence and aggression  
37 189 while in service, that occurs over and above the role played by police culture that might encourage  
38  
39 190 aggressive and authoritarian attitudes.

40  
41 191 Sadly, investigating stress in police officers is particularly difficult because they are afraid  
42  
43 192 of being identified as individuals who have been compromised by stress. They fear that this might  
44  
45 193 then cause them to be discriminated against in their careers, removed from active duties and  
46  
47 194 relegated to office work. On the other hand, a study by Summerfield [15] found work stress to be  
48  
49 195 the first cause of sickness absence and a reduction in operational duties, as well as the leading  
50  
51 196 cause of ill health retirement in police officers. A number of studies have previously evaluated  
52  
53 197 occupational stress in policemen using the DCSERI and ERIDCS models. Job strain and

1  
2  
3  
4  
5  
6  
7 198 effort/reward imbalance were associated with cardiovascular risk in policewomen [55],  
8  
9 199 musculoskeletal disorders in special police forces [56], lower mental health level in correctional  
10  
11 200 [57] and urban police officers [58]. The DCS model proved to be a valid theoretical framework for  
12  
13 201 explaining professional efficiency and exhaustion [59] and the complex interplay between job  
14  
15 202 demands, emotional exhaustion and other social and individual factors [60]. Officers with greater  
16  
17 203 perceived work stress in the first year of police service showed more severe depression symptoms  
18  
19 204 12 months later [61].

20 205 The aim of this study was to investigate, ~~apparently for the first time,~~ the association of a  
21  
22 206 condition of "distress" with the presence of self-reported symptoms of depression, anxiety and  
23  
24 207 burnout and of other common work related mental problems such as anxiety and burnout, in a  
25  
26 208 special force unit of the Italian police while controlling for socio-demographical and occupational  
27  
28 209 variables and personality traits. Previous studies on this cohort have shown that younger officers,  
29  
30 210 those who were single, had a shorter length of service, lived in barracks, had a lower rank and who  
31  
32 211 were closer to their families had a higher short-term sickness absence risk [30]. ~~Evaluation of~~  
33  
34 212 ~~Operational Stress in Riot and Crowd Control Police Units]~~ and that DCS control and support and  
35  
36 213 ERI reward measures were negatively related to frequency of absence and short-term absence and  
37 214 that DCS demand and ERI effort measures were positively related to total lost days [31]. ~~Is Absence~~  
38  
39 215 ~~Related to Work Stress?].~~ Moreover, it has been reported that the majority of these officers  
40  
41 216 described themselves as much more emotionally stable and slightly-to-moderately more  
42  
43 217 extraverted, agreeable, conscientious and open to experience than the general population and career  
44  
45 218 soldiers [4]. ~~Personality profiles of SF police officers]~~ and that some personality traits (mainly  
46  
47 219 emotional stability and agreeableness) were associated to perceived stress levels or reactivity to  
48  
49 220 environmental stressors [32]. ~~Personality traits of the Five Factor Model are associated with work~~  
50  
51 221 related stress].

Formatted: Not Highlight

Formatted: Not Highlight

Formatted: Not Highlight

Formatted: Not Highlight

1  
2  
3  
4  
5  
6  
7 222 —the 'VI Reparto Mobile' of Genoa—called on to maintain law and order in all the major  
8  
9 223 public events that take place in Italy. The police officers in this group work exclusively as First  
10  
11 224 Responders; they are carefully selected among from ordinary officers and receive specific  
12  
13 225 psychophysical and tactical training. Their routine work involves ensuring order during sporting  
14  
15 226 events, crowds and parades, natural and social emergencies, and they are also often involved in  
16  
17 227 public events in which there is a high risk of terrorist attacks and physical clashes. During a single  
18  
19 228 riot, they are on duty for an average of 10 or more hours of work, are engaged in physical clashes  
20  
21 229 for over an hour on average, and often feel that they are in imminent danger of death. They have a  
22  
23 230 special and on-going education which aims to improve team spirit ("esprit de corps") and increase  
24  
25 231 their preparation for dramatic events. The decision to hold the 2009 G8 meeting in Italy provided  
26  
27 232 the opportunity for carrying out our present study. The police officers selected to ensure law and  
28  
29 233 order during this event were asked to undergo a thorough examination of their mental health  
30  
31 234 condition so that their conduct during the meeting could not be stigmatized.  
32  
33 235  
34 236

## 35 237 Method

### 37 238 *Participants*

39 239 *Participants were the members of 'VI Reparto Mobile' of Genoa, a police special force unit called*  
40  
41 240 *on to maintain law and order in all the major public events that take place in Italy. These officers*  
42  
43 241 *work exclusively as First Responders; they are carefully selected from ordinary officers and receive*  
44  
45 242 *specific psychophysical and tactical training. Their routine work involves ensuring order during*  
46  
47 243 *sporting events, crowds and parades, natural and social emergencies, and they are also often*  
48  
49 244 *involved in public events in which there is a high risk of terrorist attacks and physical clashes.*  
50  
51 245  
52 246  
53  
54  
55  
56  
57  
58  
59  
60

1  
2  
3  
4  
5  
6  
7 247 During a single riot, they are on duty for an average of 10 or more hours of work, are engaged in  
8  
9 248 physical clashes for over an hour on average, and often feel that they are in imminent danger of  
10  
11 249 death. They have a special and on-going education which aims to improve team spirit ("esprit de  
12  
13 250 corps") and increase their preparation for dramatic events. The decision to hold the 2009 G8  
14  
15 251 meeting in Italy provided the opportunity for carrying out our present study. The police officers  
16  
17 252 selected to ensure law and order during this event were asked to undergo a thorough examination of  
18  
19 253 their mental health condition so that their conduct during the meeting could not be stigmatized. This  
20  
21 254 study refers to the initial phase of a study that began on the eve of the G8 meeting in 2009  
22  
23 255 :-The Italian special police force unit 'VI Reparto Mobile' of Genoa unit is composed of 294  
24  
25 256 members. Two officers refused to take part in the study and one was unable to complete all the tests  
26  
27 257 in the battery described in the next section and was therefore excluded. The participation rate was  
28  
29 258 99%. Since only two officers were female, gender differences could not be assessed and were  
30  
31 259 therefore excluded from the analyses. The final group of participants therefore comprised 289  
32  
33 260 officers (see Table 1 for descriptive statistics of the socio-demographic variables).

---

34 261 Insert Table 1 about here

---

35 262 Occupational stress was measured on three separate occasions: (i) in January 2009, when officers  
36  
37 263 were engaged only in routine work; (ii) in April 2009, when they underwent specific training in  
38  
39 264 preparation for the meeting, and (iii) in July 2009, shortly before the Genoa G8 summit meeting  
40  
41 265 took place. Following the procedure already adopted in previous work [30-32], we averaged the  
42  
43 266 three measurements into a single value, to obtain the level of stress that each officer had  
44  
45 267 experienced during that period.

#### 48 269 Materials:

##### 49 270 Personality measure

1  
2  
3  
4  
5  
6  
7 271 Big Five Questionnaire (BFQ, Caprara et al.1993a, b). The BFQ is a self-report measure of the Big  
8  
9 272 Five personality traits: Energy (E, Extraversion), Friendliness (F, Agreeableness),  
10  
11 273 Conscientiousness (C), Emotional Stability (S, the opposite of Neuroticism), and Openness (O).  
12  
13 274 Each scale contains 24 short phrases that eliminate some of the ambiguity that might arise when  
14  
15 275 using single adjectives. Participants are asked to rate the degree to which each item adequately  
16  
17 276 describes them on a 5-point Likert-type scale ranging from complete disagreement (1=absolutely  
18  
19 277 false for me) to complete agreement (5=very true for me). Total raw scores, ranging for each  
20  
21 278 variable from 24 to 120, were converted before analyses into standardized *T* scores ( $M=50$ ,  $SD=10$ )  
22  
23 279 using the Italian norms published in Caprara et al. (1993a). In this study reliabilities (Cronbach's  
24  
25 280 alphas) of the scales were  $E=.69$ ,  $F=.80$ ,  $C=.82$ ,  $S=.88$ , and  $O=.77$ .

Formatted: Font: Italic

Formatted: Font: Italic

Formatted: Font: Not Italic

### 26 281 Stress measurement

Formatted: Font: Italic

27  
28 282 Occupational stress was assessed using the validated Italian versions [33] of two standardized  
29  
30 283 questionnaires: the *Demand-Control-Support* (DCS) questionnaire, derived from the longer *Job*  
31  
32 284 *Content Questionnaire* [16], and the *Effort-Reward Imbalance* (ERI) questionnaire [17]. DCS is a  
33  
34 285 17-item self-report questionnaire that provides scores on three scales: *Psychological Job Demand*,  
35  
36 286 (Demand, 5 items mapping quantitative aspects of work, such as time required to perform tasks, and  
37  
38 287 conflict among different demands), *Job Control/Decision Latitude* (Control, 6 items mapping the  
39  
40 288 use and development of skills and autonomy in making decisions about the work process) and  
41  
42 289 *Workplace Social Support* (Support, 6 items mapping relationships between coworkers and  
43  
44 290 superiors). Participants are asked to rate each item on a 4-point frequency (Demand and Control) or  
45  
46 291 agreement (Support) scale. In this study reliabilities (Cronbach's alphas) of the scales were .71, .65  
47  
48 292 and .84, respectively. Along with scale sum scores, a further index, "perceived job strain" (DCS-Job  
49  
50 293 Strain) was computed by dividing the mean item score of Demand by the mean item score of the  
51  
52 294 Control scale. A ratio of 1 indicates a balance between demand and control; values >1 indicate  
53  
54 295 excessive perceived job strain [34]. ERI is a 23-item self-report questionnaire that assesses three

Formatted: Font: Italic

Formatted: Font: Italic

Formatted: Font: Italic

1  
2  
3  
4  
5  
6  
7 296 dimensions: *Effort* (6 items mapping the demanding aspects of the work environment), *Reward* (11  
8  
9 297 items mapping the occupational rewards that the worker expects to receive), and *Overcommitment*  
10  
11 298 (6 items mapping the intrinsic personal factors regarding occupational motivation and participation  
12  
13 299 that enhance the effects of stress). Participants are asked to rate each item on a 5-point intensity  
14  
15 300 scale. In this study, reliabilities of the scales were .82, .89 and .79, respectively. Along with scale  
16  
17 301 sum scores, the weighted ratio between effort and reward (E/R Ratio) was computed to quantify the  
18  
19 302 degree of mismatch between effort and reward. Values >1 reflect an imbalance that can induce  
20  
21 303 stress [35].  
22  
23 304

#### 24 305 *Materials. Mental health measurement*

25  
26 306  
27  
28 307 Mental health status was assessed after the third occasion using the following measures. Depression  
29  
30 308 was evaluated by the *Beck Depression Inventory* (BDI) [36], as this questionnaire **performed better**  
31  
32 309 **than other tests proved to be effective** for depression screening [37, 38]. The BDI consists of 21  
33  
34 310 groups of 4 alternative self-evaluation statements used to assess the presence and severity of the  
35  
36 311 affective, cognitive, motivational, psychomotor, and vegetative components of depression, with  
37  
38 312 higher scores indicating more severe depression. If multiple responses are chosen under one item,  
39  
40 313 the most symptomatic item is scored. Statement choices are scored from 0 (absent) to 3 (severe) and  
41  
42 314 can total from 0 to 63. In this study, internal consistency was 0.81. The cut-off score commonly  
43  
44 315 used in clinical practice for depression screening is 10 [39]. The probability of suffering major  
45  
46 316 depressive disorder rapidly increases above this threshold, so a higher score of 14 [37] or 16 [38] is  
47  
48 317 often chosen in order to reduce the prevalence of false positive in populations consisting of patients  
49  
50 318 affected by chronic diseases with poor or severe prognosis. In this study, we adopted the classical  
51  
52 319 cut-off level of 10, as the subjects tested were young, active and highly selected.

Formatted: Font: Italic

Formatted: Indent: First line: 0"

Formatted: Font: Italic

Formatted: Font: Italic

Formatted: Indent: First line: 0"

Formatted: Font: Italic



1  
2  
3  
4  
5  
6  
7  
8  
9  
10  
11  
12  
13  
14  
15  
16  
17  
18  
19  
20  
21  
22  
23  
24  
25  
26  
27  
28  
29  
30  
31  
32  
33  
34  
35  
36  
37  
38  
39  
40  
41  
42  
43  
44  
45  
46  
47  
48  
49  
50  
51  
52  
53  
54  
55  
56  
57  
58  
59  
60

Anxiety was ~~evaluated~~~~assessed by~~~~with~~ the *State-Trait Anxiety Inventory–Trait* (STAI-T) [40] Italian version [41]. -The STAI-T is a 20-item self-report measure of anxiety proneness requiring participants to rate their frequency of anxiety symptoms on a 4-point Likert-type scale. Nine items are reverse scored. [According to \[41\], the cut-off score used in clinical practice for anxiety screening is 40.](#) In this study the reliability of the scale was .74.

Formatted: Font: Italic

The *Maslach Burnout Inventory* (MBI) [42] Italian version [43] is a 22-item self-report measure of professional burnout. It provides scores on three facets of burnout: Professional Exhaustion ([PE](#), 9 items mapping feelings of being emotionally overextended and exhausted by one's work), Depersonalization ([DP](#), 5 items mapping an unfeeling and impersonal response towards the recipients of one's care) and Personal Accomplishment ([PA](#), 8 items mapping feelings of competence and successful achievement in one's work with people). Participants are asked to rate the frequency of experiencing feelings related to each subscale using a 7-point, Likert-type scale.

Formatted: Font: Italic

[According to Violante et al. \(\[XX\], a burnout condition can be defined by scores higher than 23 on PE, higher than 8 on DP and lower than 30 on PA.](#) In this study reliabilities of the scales were [PE=.86, DP=.60 and PA=.80](#), respectively.

Formatted: Indent: First line: 0"

### Control Variables

[The control variables used in our study were: age \(years\), length of employment \(years of service\); education level \(lower vs. equal/higher than high school\); rank \(officer vs. supervisor/technical staff\); origin \(Northern or Southern Italy\); housing \(in barracks or home\); marital status \(single/divorced vs. married/cohabiting\); presence of children \(no/yes\).](#)

Formatted: Indent: First line: 0"

### Procedure

[Personality traits were assessed in January 2009. Perceived stress was measured on three separate occasions: \(1\) in January 2009, when officers were engaged only in routine work; \(2\) in April 2009, when they underwent specific training in preparation for the meeting, and \(3\) in July](#)

15

1  
2  
3  
4  
5  
6  
7  
8  
9  
10  
11  
12  
13  
14  
15  
16  
17  
18  
19  
20  
21  
22  
23  
24  
25  
26  
27  
28  
29  
30  
31  
32  
33  
34  
35  
36  
37  
38  
39  
40  
41  
42  
43  
44  
45  
46  
47  
48  
49  
50  
51  
52  
53  
54  
55  
56  
57  
58  
59  
60

[2009, shortly before the Genoa G8 summit meeting took place. Following the procedure already adopted in previous work \[30-32\], we averaged the three measurements into a single value, to obtain the level of stress that each officer had experienced during that period. Mental health was assessed in September 2009.](#)

*Ethics*

All participants were tested anonymously and confidentially during their routine psychophysical assessment. Anonymity was achieved by identifying participants with an alphanumeric code, double-blind. The study protocol was approved by the Ethics Committee of the Università Cattolica del Sacro Cuore, Faculty of Medicine, the Institute of Occupational Medicine, responsible for coordinating the study, and the National Police Management Board and the whole procedure followed the Ethical Principles of Psychologists Code of Conduct (American Psychological Association 2002).

*Control Variables*

The control variables used in our study were: age (years); length of employment (years of service); education level (lower vs. equal/higher than high school); rank (officer vs. supervisor/technical staff); origin (Northern or Southern Italy); housing (in barracks or home); marital status (single/divorced vs. married/cohabiting); presence of children (no/yes).

*Statistical analyses*

The first research question we addressed was whether there was a relationship between the individual level of work-related stress and mental health problems [after controlling for socio-demographic and personality variables](#). In order to do this we used hierarchical multiple linear

Comment [SJD2]: Vi torna?

Formatted: Font: (Default) Arial, 10 pt

Formatted: Indent: First line: 0"

Formatted: Font: Italic

Formatted: Font: Italic

1  
2  
3  
4  
5  
6  
7 370 regression models in which BDI, [STAI and MBI](#) scores ~~were~~ specified as criteria~~on~~. In Model 1,  
8  
9 371 only the control variables were specified as predictors. [In Model 2, the BFQ personality scores were](#)  
10  
11 372 [entered in the regression model](#). In Model [32](#) and [43](#), scale scores from the DCS and from the ERI  
12  
13 373 questionnaires, respectively, were ~~entered in the regression model~~ [added as further predictors](#). In  
14  
15 374 Model [54](#), control variables, [BFQ personality scores](#) -and DCS and ERI scores were specified as  
16  
17 375 predictors. The degree of association between variables was indexed by the regression coefficient  
18  
19 376 computed on the standardized variables ( $\beta$ ). The amount of variance of the depression score  
20  
21 377 accounted for by the predictors (and the goodness of fit of the regression model) was indexed by the  
22  
23 378 adjusted  $R^2$ . Since age and length of employment were highly correlated ( $r = .91$ ), only the latter  
24  
25 379 was used as a predictor. In order to minimize the potentially confounding effects of  
26  
27 380 multicollinearity, we partialized the effects through principal component analysis. [Multiple linear](#)  
28  
29 381 [regression analysis was also used to study the correlation between occupational stress variables and](#)  
30  
31 382 [anxiety or burnout](#).

31  
32 383 We then tested the risk of suffering from depression, [anxiety and burnout](#) for a police officer  
33  
34 384 in a state of distress. We used binary logistic regression, [and caseness for each construct was](#)  
35  
36 385 [defined as a BDI score  \$\geq 10\$  for depression, a STAI score  \$> 40\$  for anxiety, MBI-PE  \$> 23\$  and MBI-](#)  
37  
38 386 [DP  \$> 8\$  and MBI-PA  \$< 30\$  for burnout, with caseness for depression \(i.e., BDI score  \$\geq 10\$ \) as](#)  
39  
40 387 ~~riterion and~~ DCS-Job Strain, social isolation (DCS-Support score below the median), isostrain (job  
41  
42 388 strain plus social isolation, i.e. support below the median), Effort/Reward imbalance (E/R ratio  $> 1$ ),  
43  
44 389 and Over-Involvement in work (ERI-Overcommitment score above the median) [were used as](#)  
45  
46 390 predictors. The resulting values ("raw" or unadjusted) were subsequently corrected by adding the  
47  
48 391 socio-demographic variables to the equation. Odds ratios (OR) and their 95% confidence intervals  
49  
50 392 (95%CI) were computed.

## Results

Mean scale scores are reported in Table 1. The mean levels of occupational stress scores were not particularly high when compared with those of other groups of Italian workers [18]. The average levels of depression, anxiety, emotional exhaustion and depersonalization scores were close to the lower limits of the respective scales, while those of personal accomplishment were high. On the basis of the Italian cut-off levels, ~~no only one cases~~ of possible anxiety ~~or and three cases of possible~~ burnout were observed. However, there were 21 (7.3%) likely cases of mild depression (BDI  $\geq$  10) and 7 (2.4%) likely cases of moderate depression (BDI  $\geq$  16). Given the negligible prevalence of possible anxiety or burnout, we applied the logistic analysis exclusively to depression.

Hierarchical multiple linear regression allowed us to test the extent to which the level of depressive mental health symptomatology can be predicted on the basis of socio-demographic, occupational, personality and work-related stress data (Table 2).

Insert Table 2 about here

The association between depression and socio-demographic variables (Model 1) was weak (Adjusted  $R^2 = .01$ ) and generally not significant, except for a positive association with length of employment, ~~which was also significant in all the following models~~. When personality traits were entered into the model (Model 2), a significant increase in Adjusted  $R^2$  was observed, due to the significant negative effect of emotional stability. A further significant increase in the proportion of variance of BDI score accounted for was observed also when DCS and ERI scores were entered (Model 3, 4 and 5). DCS-Control, ~~DCS scores were entered into the model (Model 2), a significant increase in Adjusted  $R^2$  (-10) was observed, and DCS-Control and DCS-Support and ERI-Reward showed a negative effect, whereas ERI-Effort and ERI-Reward showed a positive effect, were~~

1  
2  
3  
4  
5  
6  
7 420 significantly and negatively associated with BDI scores. When DCS scores were replaced by ERI  
8  
9 421 scores (Model 3), the Adjusted  $R^2$  significantly increased (.16) and the negative regression  
10  
11 422 coefficient of ERI Reward was the only significant effect, together with that of length of  
12  
13 423 employment. In Model 4, which included all control and occupational stress variables, Adjusted  $R^2$   
14  
15 424 was not significantly higher than Model 3, and the only significant predictors were length of  
16  
17 425 employment and the ERI Reward score.

18 426 The results of the logistic regression are shown in Table 3.

---

20 427 Insert Table 3 about here

---

22 428 For officers in a state of "distress" according to the DCS model (i.e. those with a simultaneous high  
23  
24 429 level of "demand" and low level of "control"), the risk of being depressed approximately doubled,  
25  
26 430 but not significantly, whereas the other categorical predictors were all statistically significant.  
27  
28 431 Notably, officers with an ERI-Effort/Reward ratio higher than 1 had an approximately 7-fold higher  
29  
30 432 risk of depression than the others.

31  
32 433 The results of regression analyses performed using anxiety and MBI scores as criteria are  
33  
34 434 reported in Tables 4a-d that are added as supplementary files.

---

36 435 Insert Table 4 about here

---

38 436 Socio-demographical and occupational variables accounted for a negligible proportion of variance  
39  
40 437 of the anxiety score (Model 1), with living in barracks being the only significant predictor. Entering  
41  
42 438 personality traits as further predictors (Model 2) substantially improved the fit of the model, and  
43  
44 439 lower extraversion, agreeableness and emotional stability were associated with higher anxiety  
45  
46 440 levels. The inclusion of DCS and ERI scores as predictors (Models 3-5) further increased the  
47  
48 441 Adjusted  $R^2$ . and  $F$  Results suggested that lower support, higher effort and lower rewards predicted  
49  
50 442 higher anxiety.

51 443 Table 5 reports the results of the regression analyses carried on with MBI scores as criteria.

Formatted: Indent: First line: 0"

[Insert Table 5 about here](#)

Formatted: Indent: First line: 0"

~~Anxiety was significantly associated with living in barracks, with lower scores in DCS-Support and ERI-Reward and with higher scores in ERI-Effort.~~ MBI Professional Exhaustion scores were higher in ~~older police officers and in officers~~agents (as opposed to supervisors/technical staff) (Model 1) and in officers with lower emotional stability (Model 2), and were associated with higher demand, higher effort, higher over-commitment and lower reward (Models 3-5). Depersonalization scores were lower in officers with children (Model 1), in more agreeable and emotionally stable officers (Model 2) and in officers with higher levels of control, support and reward and over levels of effort and over-commitment (Models 3-5). Personal Accomplishment scores were not related to any socio-demographical and occupational variable (Model 1), but were positively predicted by all personality traits (Model 2). Control was the only stress-related variable to be significantly associated with this scale.

~~were significantly predicted by higher ERI-Over-commitment scores. MBI Depersonalization scores were higher in older officers and in officers without children, and were significantly predicted by lower ERI-Reward scores. MBI Personal Accomplishment scores were lower in barracked officers and in officers without children, and were significantly predicted by higher DCS-Control scores.~~

Discussion

This study investigated the association between a condition of "job distress" and the presence of self-reported [mental health symptoms of depression, in conjunction with other common work-related mental problems such as anxiety and burnout](#), in a special police force unit [while controlling for socio-demographical, occupational and personality variables](#). Results from multiple regression analyses showed that [socio-demographical and occupational variables accounted for a negligible proportion of variance of mental health problems, although, consistently with a previous study on the same cohort](#) [30] [Evaluation of Operational Stress in Riot and Crowd Control Police Units](#) higher length of employment, lower rank, being barracked and not having children were significant predictors of higher symptomatology. Emotional stability was a significant predictor for all the measures of mental health problems, which was expected given the large body of research that has shown that this trait is associated with several mental disorders and physical health problems, and that this is not an artifact of the overlapping of some symptoms with questionnaire items (for a review, see [Lahey]XX). Lower levels of agreeableness (e.g., hostility) and extraversion were associated with higher anxiety and lower professional accomplishment, consistently with previous studies on the predictive power of these traits for psychological health and occupational outcomes (for a review, see [Ozer]XX). However, the focus of this study was on the role of job stressors, and results showed that they can account for a further and substantial amount of variance of mental health measures. All ERI scales and all DCS scales except demand were significant predictors of depressive symptoms, and [lower ERI Effort scores predicted higher BDI scores, whereas](#) results from logistic regression analyses revealed that a higher effort/reward imbalance was associated with an approximately sevenfold increase in risk of depression. These results suggest that, consistently with previous studies, also in the case of special force police officers, [the a lower autonomy in](#)

Formatted: Indent: First line: 0"

Formatted: Highlight

Formatted: Not Highlight

Formatted: Font: Times New Roman, 12 pt, English (U.K.)

Formatted: English (U.K.)

Formatted: Font: Times New Roman, 12 pt, English (U.K.)

Formatted: English (U.K.)

Formatted: Font: Times New Roman, 12 pt, English (U.K.)

Formatted: English (U.K.)

Formatted: Font: Times New Roman, 12 pt, English (U.K.)

Formatted: English (U.K.)

Formatted: Font: Times New Roman, 12 pt, English (U.K.)

Formatted: English (U.K.)

Formatted: Font: Times New Roman, 12 pt, English (U.K.)

Formatted: English (U.K.)

Formatted: English (U.K.)

1  
2  
3  
4  
5  
6  
7 487 ~~making decisions, poorer relationships between coworkers and superiors, the lower~~ reward  
8  
9 488 opportunities (~~or the higher the~~ imbalance between the effort spent to meet the demanding aspects  
10  
11 489 of the work environment and the rewards ~~(money, esteem and career opportunities, job security~~  
12  
13 490 ~~included), a more demanding work environment and a higher commitment can be associated with~~  
14  
15 491 ~~the higher the depressive symptomatology. Studies based on the DCS model indicate that job strain~~  
16  
17 492 ~~is associated with depression [23].~~ A recent meta-analysis of studies on the association between  
18  
19 493 stress and mental disorders indicated that psychosocial problems in the workplace, reduced control,  
20  
21 494 job strain, low social support, and the discrepancy between effort and rewards predict the onset of  
22  
23 495 depression [44]. Another review of 14 longitudinal studies reported that lack of social support  
24  
25 496 enhanced depression [45]. The association we found between low reward and symptoms is in  
26  
27 497 agreement with that suggested by neurobiological studies on depression [46]. ~~However, we could~~  
28  
29 498 ~~not replicate the finding that a joint use of the DCS and the ERI models provides greater predictive~~  
30  
31 499 ~~power for depressive disorders than models that include only one of them [47]. In this study, only~~  
32  
33 500 ~~the ERI model proved to be useful in predicting depression scores of police officers. Lack of~~  
34  
35 501 ~~rewards and excessive over commitment significantly increased depression scores and the~~  
36  
37 502 ~~probability of disease, respectively. This result replicates the observations of Martins and Lopes~~  
38  
39 503 ~~[48] who argued that effort, reward and over commitment are associated with the presence of~~  
40  
41 504 ~~common mental disorders among military personnel in peacetime, and those of Kingdom and Smith~~  
42  
43 505 ~~[49] who showed that ERI was the most important predictor of depression among police officers in~~  
44  
45 506 ~~the UK Coast Guard. More generally, our results are in agreement with a large body of literature on~~  
46  
47 507 ~~the relationship between reward processing and depressive symptoms [46]. To a lesser extent, the~~  
48  
49 508 ~~DCS model captured some important aspects, such as the lack of control over the organization of~~  
50  
51 509 ~~work and the lack of support from colleagues or superiors. The role of lack of support from~~  
52  
53 510 ~~superiors and on the part of the organization to which the worker belongs in the occurrence of~~  
54  
55 511 ~~depression has already been reported by Berg et al. in the Norwegian police [50], and by Arial et al.~~

Comment [SJD3]: questo lo toglierei



1  
2  
3  
4  
5  
6  
7 512 [51] in a sample of Swiss police. Overall, both models appear to be useful for diagnosing a situation  
8  
9 513 of suffering which could result in disease.

10  
11 514 Although not the main focus of this study, the Albeit to a lesser extent, the DCS and the ERI  
12  
13 515 model also showed a good ability to predict anxiety. Differently form other studies that found that  
14  
15 516 all the three components of the DCS were significant predictors of anxiety [e.g., 8], in this study  
16  
17 517 only support, i.e., the quality of relationships between coworkers and superiors, was significant,  
18  
19 518 suggesting that this dimension might be play a central role in the development of anxiety in special  
20  
21 519 force police officers. Results for the ERI model were also only partially consistent with the  
22  
23 520 literature which found little predictive power of ERI scales for anxiety [e.g., 52], since in the cohort  
24  
25 521 under study higher efforts needed to meet the demands of the working environment and lower  
26  
27 522 occupational rewards were associated with higher anxiety.

28 523 As for burnout, all ERI scales proved to be useful in predicting professional exhaustion and  
29  
30 524 depersonalization, since higher effort and over-commitment and lower reward were associated with  
31  
32 525 higher scores, whereas they did not account for a substantial amount of variance or personal  
33  
34 526 accomplishment. At least one DCS scale significantly predicted each burnout dimension (demand  
35  
36 527 predicted professional exhaustion, control and support predicted depersonalization, control  
37  
38 528 predicted personal accomplishment).

39 529 Taken together, these results suggest that for special force police officers prediction models  
40  
41 530 that include both the DCS and the ERI scores can provide a substantially greater predictive power  
42  
43 531 for mental health symptoms than models that include only socio-demographical and occupational  
44  
45 532 variables and personality traits. These results are consistent with some of previous studies (e.g.,  
46  
47 533 [47], on engineers) but not with others (e.g., [52] on civil servants), possibly suggesting that the  
48  
49 534 effects of the dimensions of job distress on mental health might be the outcome of a complex  
50  
51 535 interaction among the peculiar features of each occupation and the psychological characteristics of  
52  
53 536 the workers, which necessarily self-select into occupations. In the very case of the officers assessed

1  
2  
3  
4  
5  
6  
7 537 [in this study, poor relationships between coworkers and superiors, higher efforts spent and lower](#)  
8  
9 538 [rewards received are likely to elicit mental health problems, whereas the use and development of](#)  
10  
11 539 [skills and autonomy in making decisions about the work process and the intrinsic personal factors](#)  
12  
13 540 [regarding occupational motivation and participation may play a role for some specific problems.](#)  
14  
15 541 [These findings replicate the observations of Martins and Lopes \[48\] who reported that effort,](#)  
16  
17 542 [reward and over-commitment are associated with the presence of common mental disorders among](#)  
18  
19 543 [military personnel in peacetime, and those of Kingdom and Smith \[49\] who showed that ERI was](#)  
20  
21 544 [the most important predictor of depression among police officers in the UK Coast Guard. More](#)  
22  
23 545 [generally, our results are in agreement with a large body of literature on the relationship between](#)  
24  
25 546 [reward processing and depressive symptoms \[46\]. The DCS model captured some important](#)  
26  
27 547 [aspects, such as the lack of control over the organization of work and the lack of support from](#)  
28  
29 548 [colleagues or superiors. The role of lack of support from superiors and on the part of the](#)  
30  
31 549 [organization to which the worker belongs in the occurrence of depression has already been reported](#)  
32  
33 550 [by Berg et al. in the Norwegian police \[50\], and by Arial et al. \[51\] in a sample of Swiss police,](#)  
34  
35 551 [and two of the three core dimensions of burnout \(i.e. emotional exhaustion and depersonalization\),](#)  
36  
37 552 [consistent with previous studies \[52, 53\], whereas the DCS Control score was significantly](#)  
38  
39 553 [associated with personal accomplishment. Some background variables also showed a significant](#)  
40  
41 554 [association with measures of mental health. Higher length of employment \(which overlaps age\) was](#)  
42  
43 555 [associated with higher depressive symptomatology, anxiety, professional exhaustion and](#)  
44  
45 556 [depersonalization; being barracked was associated with higher anxiety and lower personal](#)  
46  
47 557 [accomplishment; being an operational policeman was associated with higher professional](#)  
48  
49 558 [exhaustion; having children was associated with lower depersonalization. These results are in line](#)  
50  
51 559 [with previous studies on members of the armed forces \[54\].](#)

52  
53 561 [Sadly, investigating stress in police officers is particularly difficult because they are afraid](#)  
54  
55  
56  
57  
58  
59  
60  
61  
62  
63  
64  
65  
66  
67  
68  
69  
70  
71  
72  
73  
74  
75  
76  
77  
78  
79  
80  
81  
82  
83  
84  
85  
86  
87  
88  
89  
90  
91  
92  
93  
94  
95  
96  
97  
98  
99  
100  
101  
102  
103  
104  
105  
106  
107  
108  
109  
110  
111  
112  
113  
114  
115  
116  
117  
118  
119  
120  
121  
122  
123  
124  
125  
126  
127  
128  
129  
130  
131  
132  
133  
134  
135  
136  
137  
138  
139  
140  
141  
142  
143  
144  
145  
146  
147  
148  
149  
150  
151  
152  
153  
154  
155  
156  
157  
158  
159  
160  
161  
162  
163  
164  
165  
166  
167  
168  
169  
170  
171  
172  
173  
174  
175  
176  
177  
178  
179  
180  
181  
182  
183  
184  
185  
186  
187  
188  
189  
190  
191  
192  
193  
194  
195  
196  
197  
198  
199  
200  
201  
202  
203  
204  
205  
206  
207  
208  
209  
210  
211  
212  
213  
214  
215  
216  
217  
218  
219  
220  
221  
222  
223  
224  
225  
226  
227  
228  
229  
230  
231  
232  
233  
234  
235  
236  
237  
238  
239  
240  
241  
242  
243  
244  
245  
246  
247  
248  
249  
250  
251  
252  
253  
254  
255  
256  
257  
258  
259  
260  
261  
262  
263  
264  
265  
266  
267  
268  
269  
270  
271  
272  
273  
274  
275  
276  
277  
278  
279  
280  
281  
282  
283  
284  
285  
286  
287  
288  
289  
290  
291  
292  
293  
294  
295  
296  
297  
298  
299  
300  
301  
302  
303  
304  
305  
306  
307  
308  
309  
310  
311  
312  
313  
314  
315  
316  
317  
318  
319  
320  
321  
322  
323  
324  
325  
326  
327  
328  
329  
330  
331  
332  
333  
334  
335  
336  
337  
338  
339  
340  
341  
342  
343  
344  
345  
346  
347  
348  
349  
350  
351  
352  
353  
354  
355  
356  
357  
358  
359  
360  
361  
362  
363  
364  
365  
366  
367  
368  
369  
370  
371  
372  
373  
374  
375  
376  
377  
378  
379  
380  
381  
382  
383  
384  
385  
386  
387  
388  
389  
390  
391  
392  
393  
394  
395  
396  
397  
398  
399  
400  
401  
402  
403  
404  
405  
406  
407  
408  
409  
410  
411  
412  
413  
414  
415  
416  
417  
418  
419  
420  
421  
422  
423  
424  
425  
426  
427  
428  
429  
430  
431  
432  
433  
434  
435  
436  
437  
438  
439  
440  
441  
442  
443  
444  
445  
446  
447  
448  
449  
450  
451  
452  
453  
454  
455  
456  
457  
458  
459  
460  
461  
462  
463  
464  
465  
466  
467  
468  
469  
470  
471  
472  
473  
474  
475  
476  
477  
478  
479  
480  
481  
482  
483  
484  
485  
486  
487  
488  
489  
490  
491  
492  
493  
494  
495  
496  
497  
498  
499  
500  
501  
502  
503  
504  
505  
506  
507  
508  
509  
510  
511  
512  
513  
514  
515  
516  
517  
518  
519  
520  
521  
522  
523  
524  
525  
526  
527  
528  
529  
530  
531  
532  
533  
534  
535  
536  
537  
538  
539  
540  
541  
542  
543  
544  
545  
546  
547  
548  
549  
550  
551  
552  
553  
554  
555  
556  
557  
558  
559  
560  
561  
562  
563  
564  
565  
566  
567  
568  
569  
570  
571  
572  
573  
574  
575  
576  
577  
578  
579  
580  
581  
582  
583  
584  
585  
586  
587  
588  
589  
590  
591  
592  
593  
594  
595  
596  
597  
598  
599  
600  
601  
602  
603  
604  
605  
606  
607  
608  
609  
610  
611  
612  
613  
614  
615  
616  
617  
618  
619  
620  
621  
622  
623  
624  
625  
626  
627  
628  
629  
630  
631  
632  
633  
634  
635  
636  
637  
638  
639  
640  
641  
642  
643  
644  
645  
646  
647  
648  
649  
650  
651  
652  
653  
654  
655  
656  
657  
658  
659  
660  
661  
662  
663  
664  
665  
666  
667  
668  
669  
670  
671  
672  
673  
674  
675  
676  
677  
678  
679  
680  
681  
682  
683  
684  
685  
686  
687  
688  
689  
690  
691  
692  
693  
694  
695  
696  
697  
698  
699  
700  
701  
702  
703  
704  
705  
706  
707  
708  
709  
710  
711  
712  
713  
714  
715  
716  
717  
718  
719  
720  
721  
722  
723  
724  
725  
726  
727  
728  
729  
730  
731  
732  
733  
734  
735  
736  
737  
738  
739  
740  
741  
742  
743  
744  
745  
746  
747  
748  
749  
750  
751  
752  
753  
754  
755  
756  
757  
758  
759  
760  
761  
762  
763  
764  
765  
766  
767  
768  
769  
770  
771  
772  
773  
774  
775  
776  
777  
778  
779  
780  
781  
782  
783  
784  
785  
786  
787  
788  
789  
790  
791  
792  
793  
794  
795  
796  
797  
798  
799  
800  
801  
802  
803  
804  
805  
806  
807  
808  
809  
810  
811  
812  
813  
814  
815  
816  
817  
818  
819  
820  
821  
822  
823  
824  
825  
826  
827  
828  
829  
830  
831  
832  
833  
834  
835  
836  
837  
838  
839  
840  
841  
842  
843  
844  
845  
846  
847  
848  
849  
850  
851  
852  
853  
854  
855  
856  
857  
858  
859  
860  
861  
862  
863  
864  
865  
866  
867  
868  
869  
870  
871  
872  
873  
874  
875  
876  
877  
878  
879  
880  
881  
882  
883  
884  
885  
886  
887  
888  
889  
890  
891  
892  
893  
894  
895  
896  
897  
898  
899  
900  
901  
902  
903  
904  
905  
906  
907  
908  
909  
910  
911  
912  
913  
914  
915  
916  
917  
918  
919  
920  
921  
922  
923  
924  
925  
926  
927  
928  
929  
930  
931  
932  
933  
934  
935  
936  
937  
938  
939  
940  
941  
942  
943  
944  
945  
946  
947  
948  
949  
950  
951  
952  
953  
954  
955  
956  
957  
958  
959  
960  
961  
962  
963  
964  
965  
966  
967  
968  
969  
970  
971  
972  
973  
974  
975  
976  
977  
978  
979  
980  
981  
982  
983  
984  
985  
986  
987  
988  
989  
990  
991  
992  
993  
994  
995  
996  
997  
998  
999  
1000

50  
51 560 [Sadly, investigating stress in police officers is particularly difficult because they are afraid](#)  
52  
53 561 [of being identified as individuals who have been compromised by stress. They fear that this might](#)

Formatted: Indent: First line: 0"

~~then cause them to be discriminated against in their careers, removed from active duties and relegated to office work. On the other hand, a study by Summerfield [15] found work stress to be the first cause of sickness absence and a reduction in operational duties, as well as the leading cause of ill health retirement in police officers. A number of studies have previously evaluated occupational stress in policemen using the DCS and ERI models. Job strain and effort/reward imbalance were associated with cardiovascular risk in policewomen [55], musculoskeletal disorders in special police forces [56], lower mental health level in correctional [57] and urban police officers [58]. The DCS model proved to be a valid theoretical framework for explaining professional efficiency and exhaustion [59] and the complex interplay between job demands, emotional exhaustion and other social and individual factors [60]. Officers with greater perceived work stress in the first year of police service showed more severe depression symptoms 12 months later [61].~~

It might be argued that only seven per cent of police officers in our cohort reported a level of depressive symptomatology higher than the risk threshold. In fact, such prevalence is lower than that found by Fox et al. [62] in urban US police officers (9%), by Frühwald et al. [63] in Lower Austria (9%), by Arial et al. [51] in Swiss police officers (11.9%), by Chen et al. [64] in Taiwanese police officers (21.6%), and by Obidoa et al. [65] among US corrections officers (31%), and it is comparable with that found in other working populations [25, 28]. Moreover, a nationwide study in the Norwegian police service showed that the younger police officers reported lower levels of depressive symptoms than the corresponding general population [50]. A recent comparison of police and other employees found no indications that self-reported mental health disturbances are more prevalent among police officers than among groups of employees that are not considered to be high-risk groups [66]. Since our sample was composed of young and highly selected police officers, whose emotional stability was higher than the general population [4], this result is not surprising.

~~However, this does not mean that the problem of depression in this special unit is negligible, and, besides individual health related risk factors, it~~ must not be overlooked that depression represents a

1  
2  
3  
4  
5  
6  
7 587 considerable cost for productivity both in terms of absenteeism and presenteeism [67] and more  
8  
9 588 importantly, given the highly sensitive tasks the officers of this study have to accomplish, it  
10  
11 589 increases the possibility of errors and the risk to the health and safety of others. Police officers with  
12  
13 590 depressive symptoms should therefore be given timely and confidential assistance ([e.g.](#)  
14  
15 591 [\[XXBerking\]](#)) and the causes of excessive occupational stress should be promptly identified and  
16  
17 592 removed or minimized.

18 593 The results reported in this study should be interpreted with caution. [First,](#) as all the  
19  
20 594 measures were self-reported questionnaires, and reporting bias and subjectivity may therefore have  
21  
22 595 distorted the observations. Depressed persons could be more likely to report psychosocial stress at  
23  
24 596 work, even if objectively their work environment is not at risk *per se*. [Second, the fact that job](#)  
25  
26 597 [distress variables were measured before mental health symptoms supports prediction but not](#)  
27  
28 598 [necessarily a causal hypothesis, since mental health symptoms could have been present even \*before\*](#)  
29  
30 599 [or \*during\* the assessment of job distress.](#) ~~The cross-sectional nature of the research does not allow us~~  
31  
32 600 ~~to infer the direction of the observed phenomena, and thus separate cause from effect.~~ Specifically,  
33  
34 601 we could not address the issue of whether the observed reduction in experience of reward is an  
35  
36 602 epiphenomenon of the presence of ~~depressive-mental health~~ symptoms. Finally, because our sample  
37  
38 603 corresponds to a specific police unit, and it is a relatively small cohort, our results may not be  
39  
40 604 generalizable to police officers with different occupational exposure, nor to special forces in  
41  
42 605 countries with different ethnic or cultural characteristics. However, our study also has several  
43  
44 606 important strengths. To our knowledge, this is the first study to investigate associations of  
45  
46 607 ~~depression-mental health problems~~ with work stress in terms of both DCS and ERI models in  
47  
48 608 special force police officers [while controlling for socio-demographical and occupational variables](#)  
49  
50 609 [and personality traits](#). Such a population has a high exposure to homogenous occupational risks,  
51  
52 610 while many studies include [police officers engaged in investigative activities, control of the](#)  
53  
54 611 [territory, administrative and office activities and many other](#) ~~persons who perform~~ very different

26

Formatted: Font: Italic

1  
2  
3  
4  
5  
6  
7  
8  
9  
10  
11  
12  
13  
14  
15  
16  
17  
18  
19  
20  
21  
22  
23  
24  
25  
26  
27  
28  
29  
30  
31  
32  
33  
34  
35  
36  
37  
38  
39  
40  
41  
42  
43  
44  
45  
46  
47  
48  
49  
50  
51  
52  
53  
54  
55  
56  
57  
58  
59  
60

tasks. The participation rate was very high (99%). Finally, since the measurements used in this study have been validated in several other studies, our results are more comparable with other research findings.

Limitations notwithstanding, the present findings indicate that some aspects of psychosocial environment at work, such as the imbalance between effort and reward, are associated with depressive symptoms, anxiety and burnout in special force police officers. Although we could not establish a casual relationship and these results need to be replicated in longitudinal studies, they suggest that the dimensions of ~~effort, reward and over-commitment~~ [the DCS and ERI models](#) can be useful in monitoring psychological functioning of special force police officers.

## References

1. Cherry NM, Chen Y, McDonald JC. Reported incidence and precipitating factors of work-related stress and mental ill-health in the United Kingdom (1996-2001). *Occup Med (Lond)*. 2006;56(6):414-21.
2. Melchior M, Caspi A, Milne BJ, Danese A, Poulton R, Moffitt TE. Work stress precipitates depression and anxiety in young, working women and men. *Psychol Med*. 2007; 37(8):1119-29.
3. Paoli P, Merllié D. European Foundation for the Improvement of Living and Working Conditions—Third European survey on working conditions. Luxembourg: Office for Official Publications of the European Communities; 2000.
4. Garbarino S, Chiorri C, Magnavita N, Piattino S, Cuomo G. Personality profiles of Special Force police officers. *J Police Crim Psychol* 2012; 27(2): 99-110.
5. Yuan C, Wang Z, Inslicht SS, McCaslin SE, Metzler TJ, Henn-Haase C, Apfel BA, Tong H, Neylan TC, Fang Y, Marmar CR. Protective factors for posttraumatic stress disorder symptoms in a prospective study of police officers. *Psychiatry Res*. 2011;188(1):45-50.
6. Evans R, Pistrang N, Billings J. Police officers' experiences of supportive and unsupportive social interactions following traumatic incidents. *Eur J Psychotraumatol*. 2013;4. doi: 10.3402/ejpt.v4i0.19696.
7. Galatzer-Levy IR, Brown AD, Henn-Haase C, Metzler TJ, Neylan TC, Marmar CR. Positive and Negative Emotion Prospectively Predict Trajectories of Resilience and Distress Among High-Exposure Police Officers. *Emotion*. 2013 Jan 21. [Epub ahead of print]
8. Sanne B, Mykletun A, Dahl A, Moen B, Tell G. Testing the job Demand-Control-Support model with anxiety and depression as outcomes: The Hordaland Health Study. *Occup Med (Lond)*. 2005;55:463–73.

- 1  
2  
3  
4  
5  
6  
7 646 9. Berg AM, Hem E, Lau B, Håseth K, Ekeberg O. Stress in the Norwegian police service.  
8  
9 647 Occup Med (Lond). 2005; 55(2):113-20.  
10  
11 648 10. Violanti JM. Police organizational stress: the impact of negative discipline. Int J Emerg  
12  
13 649 Ment Health. 2011;13(1):31-6.  
14  
15 650 11. Garbarino S, Magnavita N, Elovainio M, Heponiemi T, Ciprani F, Cuomo G, Bergamaschi  
16  
17 651 A. Police job strain during routine activities and a major event. Occup Med (Lond). 2011;  
18  
19 652 61(6):395-9.  
20 653 12. McEwen BS. Stress, adaptation and disease. Allostasis and allostatic load. Ann N Y Acad  
21  
22 654 Sci 1998; 840: 33-44.  
23  
24 655 13. Cooper B. Mental health epidemiology today: a monitor of distress. Epidemiol Psychiatr  
25  
26 656 Sci. 2012;21(2):171-3  
27  
28 657 14. Winwood PC, Peters R, Peters M, Dollard M. Further validation of the psychological injury  
29  
30 658 risk indicator scale. J Occup Environ Med. 2012;54(4):478-84.  
31  
32 659 15. Summerfield D. Metropolitan Police blues: protracted sickness absence, ill health  
33  
34 660 retirement, and the occupational psychiatrist. BMJ. 2011; 342:d2127.  
35  
36 661 16. Karasek RA. Job demands, job decision latitude, and mental strain. Implication for job  
37  
38 662 redesign. Adm Sci Q 1979; 24: 285-308  
39 663 17. Siegrist J. Adverse health effects of high-effort/low-reward conditions. J Occup Health  
40  
41 664 Psychol 1996; 1:27-41  
42  
43 665 18. Magnavita N, Garbarino S. Social psychiatry in the waiting room. What a physician can  
44  
45 666 learn about occupational stress from workers waiting to be examined. Psychiatry Journal,  
46  
47 667 Volume 2013 (2013), Article ID 701872, 7 pages <http://dx.doi.org/10.1155/2013/701872>  
48  
49 668 19. Nieuwenhuijsen K, Bruinvels D, Frings-Dresen M. Psychosocial work environment and  
50  
51 669 stress-related disorders, a systematic review. Occup Med (Lond). 2010; 60(4):277-86.  
52  
53  
54  
55  
56  
57  
58  
59  
60

- 1  
2  
3  
4  
5  
6  
7 670 20. Marchand A, Blanc ME. The contribution of work and non-work factors to the onset of  
8  
9 671 psychological distress: an eight-year prospective study of a representative sample of  
10  
11 672 employees in Canada. *J Occup Health*. 2010; 52(3):176-85.
- 12  
13 673 21. van Rhenen W, van Dijk FJ, Schaufeli WB, Blonk RW. Distress or no distress, that's the  
14  
15 674 question: A cutoff point for distress in a working population. *J Occup Med Toxicol*. 2008;  
16  
17 675 3:3. doi: 10.1186/1745-6673-3-3.
- 18  
19 676 22. van der Klink JJ, van Dijk FJ. Dutch practice guidelines for managing adjustment disorders  
20 677 in occupational and primary health care. *Scand J Work Environ Health*. 2003; 29(6):478-87.
- 21  
22 678 23. Bonde JPE. Psychosocial factors at work and risk of depression: a systematic review of the  
23  
24 679 epidemiological evidence. *Occup Environ Med* 2008; 65: 438-445.  
25  
26 680 doi:10.1136/oem.2007.038430
- 27  
28 681 24. Netterstrøm B, Conrad N, Bech P, Fink P, Olsen O, Rugulies R, Stansfeld S. The relation  
29  
30 682 between work-related psychosocial factors and the development of depression. *Epidemiol*  
31  
32 683 *Rev* 2008;30(1):118-132 doi:10.1093/epirev/mxn004
- 33  
34 684 25. Pflanz SE, Ogle AD. Job stress, depression, work performance, and perceptions of  
35  
36 685 supervisors in military personnel. *Mil Med*. 2006;171(9):861-5.
- 37 686 26. Iversen AC, van Staden L, Hughes JH, Browne T, Hull L, Hall J et al. The prevalence of  
38  
39 687 common mental disorders and PTSD in the UK military: using data from a clinical  
40  
41 688 interview-based study. *BMC Psychiatry*. 2009;9:68.
- 42  
43 689 27. Jones M, Rona RJ, Hooper R, Wessely S. The burden of psychological symptoms in UK  
44  
45 690 Armed Forces. *Occup Med (Lond)*. 2006;56(5):322-8.
- 46  
47 691 28. Iversen A, Dyson C, Smith N, et al. Prevalence of mental disorders in Europe: results from  
48  
49 692 the European Study of the Epidemiology of Mental Disorders (ESEMED) project. *Acta*  
50  
51 693 *Psychiatr Scand Suppl*. 2004; 420:21-7.

Formatted: French (France)



- 1  
2  
3  
4  
5  
6  
7 694 29. Violanti JM. Police Suicide: Epidemic in Blue, 2nd ed., Charles C Thomas Publisher,  
8 Springfield, IL: 2007.  
9 695  
10  
11 696 30. Garbarino S, Magnavita N, Chiorri C, Brisinda D, Cuomo G , Venuti A, Fenici R.  
12 Evaluation of operational stress in riot and crowd control police units: A global challenge  
13 697 for prevention and management of police task-related stress. J Police Crim Psychol. 2012;  
14 for prevention and management of police task-related stress. J Police Crim Psychol. 2012;  
15 698 27(2): 111-122 DOI 10.1007/s11896-012-9104-8  
16 699  
17  
18 700 31. Magnavita N, Garbarino S. Is absence related to work stress? A repeated cross-sectional  
19 study on a special police force. AJIM 2013 Jan 17 Published online in Wiley Online Library  
20 701 DOI10.1002/ajim.22155.  
21  
22 702  
23  
24 703 32. Garbarino S, Chiorri C, Magnavita N. Personality traits of the Five-Factor Model are  
25 associated with work-related stress in special force police officers. IAOEH 2013 Mar 6 DOI:  
26 704 10.1007/s00420-013-0861-1  
27  
28 705  
29  
30 706 33. Magnavita N. Two tools for health surveillance of job stress: the Karasek Job Content  
31 Questionnaire and the Siegrist Effort Reward Imbalance Questionnaire. G Ital Med Lav  
32 707 Ergon 2007; 29 (3): 667-670  
33 708  
34  
35 709 34. Courvoisier DS, Perneger TV. Validation of alternative formulations of job strain. J Occup  
36 Health 2010;52:5-13.  
37 710  
38  
39 711 35. Juniper B, White N, Bellamy P. A new approach to evaluating the well-being of police.  
40 Occup Med (Lond) 2010;60:560-565. doi: 10.1093/occmed/kqq130.  
41 712  
42  
43 713 36. Beck AT, Rush AJ, Shaw BF, Emery G. Cognitive therapy of depression. Guilford Press,  
44 New York 1979  
45 714  
46  
47 715 37. Bunevicius A, Staniute M, Brozaitiene J, Pommer AM, Pop VJ, Montgomery SA,  
48 Bunevicius R. Evaluation of depressive symptoms in patients with coronary artery disease  
49 716 using the Montgomery Åsberg Depression Rating Scale. Int Clin Psychopharmacol.  
50 717 2012;27(5):249-55  
51 718  
52  
53  
54  
55  
56  
57  
58  
59  
60

- 1  
2  
3  
4  
5  
6  
7 719 38. Preljevic VT, Osthus TB, Sandvik L, Opjordsmoen S, Nordhus IH, Os I, Dammen T.  
8  
9 720 Screening for anxiety and depression in dialysis patients: Comparison of the Hospital  
10  
11 721 Anxiety and Depression Scale and the Beck Depression Inventory. *J Psychosom Res.*  
12  
13 722 2012;73(2):139-44.
- 14  
15 723 39. Adachi Y, Aleksic B, Nobata R, Suzuki T, Yoshida K, Ono Y, Ozaki N. Combination use of  
16  
17 724 Beck Depression Inventory and two-question case-finding instrument as a screening tool for  
18  
19 725 depression in the workplace. *BMJ Open.* 2012;2(3). pii: e000596.
- 20 726 40. Spielberger CD, Gorsuch RL, Lushene RE, Vagg PR, Jacobs GA. The state-trait anxiety  
21  
22 727 inventory fo adults. Manual. Mind Garden, Palo Alto (CA) 1983
- 23  
24 728 41. Sanavio E, Bertolotti G, Michielin P, Vidotto G, Zotti AM. CBA-2.0. Cognitive behavioural  
25  
26 729 assessment 2.0. Scale primarie. Giunti OS, Firenze, 1997.
- 27  
28 730 42. Maslach C, Jackson SE. The measurement of experienced burnout. *J Occup Behav* 1981;  
29  
30 731 2:99-113
- 31  
32 732 43. Sirigatti S, Stefanile C. MBI. Maslach Burnout Inventory. Adattamento italiano. Giunti OS,  
33  
34 733 Firenze, 1993.
- 35  
36 734 44. Stansfeld S, Candy B. Psychosocial work environment and mental health--a meta-analytic  
37  
38 735 review. *Scand J Work Environ Health.* 2006; 32(6):443-62.
- 39 736 45. Netterstrøm B, Conrad N, Bech P, Fink P, Olsen O, Rugulies R, Stansfeld S. The relation  
40  
41 737 between work-related psychosocial factors and the development of depression. *Epidemiol*  
42  
43 738 *Rev.* 2008; 30:118-32.
- 44  
45 739 46. Eshel N, Roiser JP. Reward and punishment processing in depression. *Biol Psych* 2010;  
46  
47 740 68(2): 118-124. DOI: 10.1016/j.biopsycho.2010.01.027
- 48  
49 741 47. Chen SW, Wang PC, Hsin PL, Oates A, Sun IW, Liu SI. Job stress models, depressive  
50  
51 742 disorders and work performance of engineers in microelectronics industry. *Int Arch Occup*  
52  
53 743 *Environ Health* 2011; 84(1):91-103.

Formatted: Italian (Italy)

- 1  
2  
3  
4  
5  
6  
7 744 48. Martins LCX, Lopes CS. Military hierarchy, job stress and mental health in peacetime. *Occ*  
8  
9 745 *Med (Oxford)* 2012; 62: 182-187  
10  
11 746 49. Kingdom SE, Smith AP. Combined effects of work-related stress in Her Majesty's  
12  
13 747 Coastguard (HMCG). *Int Marit Health*. 2012;63(1):63-70.  
14  
15 748 50. Berg AM, Hem E, Lau B, Ekeberg Ø. An exploration of job stress and health in the  
16  
17 749 Norwegian police service: a cross sectional study. *J Occup Med Toxicol*. 2006 ;1:26.  
18  
19 750 51. Arial M, Gonik V, Wild P, Danuser B. Association of work related chronic stressors and  
20 751 psychiatric symptoms in a Swiss sample of police officers; a cross sectional questionnaire  
21  
22 752 study. *Int Arch Occup Environ Health* 2010; 83: 323-331.  
23  
24 753 52. Griffin JM, Greiner BA, Stansfeld SA, Marmot M. The effect of self-reported and observed  
25  
26 754 job conditions on depression and anxiety symptoms: a comparison of theoretical models. *J*  
27  
28 755 *Occup Health Psych* 2007; 12, 334–349.  
29  
30 756 53. Bakker AB, Killmer CH, Siegrist J, Schaufeli WB. Effort–reward imbalance and burnout  
31  
32 757 among nurses. *J Adv Nurs* 2000; 31, 884-891.  
33  
34 758 54. Arata KV. Burnout in the Armed Forces: Communication, Satisfaction, and Commitment.  
35  
36 759 Department of the Army, Washington, DC. 1996.  
37 760 55. Yoo H, Franke WD. Stress and cardiovascular disease risk in female law enforcement  
38  
39 761 officers. *Int Arch Occup Environ Health*. 2011; 84(3):279-86.  
40  
41 762 56. von dem Knesebeck O, David K, Siegrist J. Psychosocial stress at work and musculoskeletal  
42  
43 763 pain among police officers in special forces. *Gesundheitswesen*. 2005; 67(8-9):674-9.  
44  
45 764 57. Bourbonnais R, Jauvin N, Dussault J, Vézina M. Psychosocial work environment,  
46  
47 765 interpersonal violence at work and mental health among correctional officers. *Int J Law*  
48  
49 766 *Psychiatry*. 2007; 30(4-5):355-68.  
50  
51 767 58. Janzen BL, Muhajarine N, Zhu T, Kelly IW. Effort-reward imbalance, overcommitment,  
52  
53 768 and psychological distress in Canadian police officers. *Psychol Rep*. 2007; 100(2):525-30.  
54

- 1  
2  
3  
4  
5  
6  
7 769 59. Taris TW, Kompier MAJ, Geurts SAE, Houtman ILD, van den Heuvel FFM. Professional  
8 efficacy, exhaustion, and work characteristics among police officers: A longitudinal test of  
9 770 the learning-related predictions of the demand-control model. *J Occup Organizat Psychol*  
10 the learning-related predictions of the demand-control model. *J Occup Organizat Psychol*  
11 771 2010; 83: 455-474  
12  
13 772
- 14 60. Hall GB, Dollard MF, Tuckey MR, Winefield AH, Thompson BM. Job demands, work-  
15 773 family conflicts, and emotional exhaustion in police officers: a longitudinal test of  
16 774 competing theories. *J Occup Organizat Psychol* 2010; 83: 237-250.  
17 775  
18 775
- 19 61. Wang Z, Inslicht SS, Metzler TJ, Henn-Haase C, McCaslin SE, Tong H, et al. A prospective  
20 776 study of predictors of depression symptoms in police. *Psychiatry Res.* 2010;175(3):211-6.  
21  
22 777  
23
- 24 778 62. Fox J, Desai MM, Britten K, Lucas G, Luneau R, Rosenthal MS. Mental-health conditions,  
25 barriers to care, and productivity loss among officers in an urban police department. *Conn*  
26 779  
27  
28 780  
29
- 30 781 63. Frühwald S, Entenfellner A, Grill W, Korbel C, Frottier P. Raising awareness about  
31 depression together with service users and relatives - results of workshops for police officers  
32 782 in Lower Austria. *Neuropsychiatr.* 2011;25(4):183-91.  
33 783  
34
- 35 784 64. Chen HC, Chou FH, Chen MC, Su SF, Wang SY, Feng WW, et al. A survey of quality of  
36 life and depression for police officers in Kaohsiung, Taiwan. *Qual Life Res.*  
37 785 2006;15(5):925-32.  
38  
39 786  
40
- 41 787 65. Obidoa C, Reeves D, Warren N, Reisine S, Cherniack M. Depression and work family  
42 conflict among corrections officers. *J Occup Environ Med.* 2011;53(11):1294-301.  
43 788  
44
- 45 789 66. van der Velden PG, Rademaker AR, Vermetten E, Portengen MA, Yzermans JC, Grievink  
46 L. Police officers: a high-risk group for the development of mental health disturbances? A  
47 790 cohort study. *BMJ Open.* 2013 Jan 24;3(1). doi:pii: e001720. 10.1136/bmjopen-2012-  
48 791 001720  
49  
50 792  
51  
52  
53  
54  
55  
56  
57  
58  
59  
60

1  
2  
3  
4  
5  
6  
7 793 67. Lee YM . Loss of productivity due to depression among Korean employees J Occup Health  
8  
9 794 2010; 52: 389-394.

10 Rugulies R, Krause N. Job strain, iso-strain, and the incidence of low back and neck injuries.

11 A 7.5-year prospective study of San Francisco transit operators. Soc Sci Med.

12 2005;61(1):27-39.

13 Amick BC 3rd, Kawachi I, Coakley EH, Lerner D, Levine S, Colditz GA. Relationship of

14 job strain and iso-strain to health status in a cohort of women in the United States. Scand J

15 Work Environ Health. 1998;24(1):54-61.

16 Violante S, Benso PG, Gerbaudo L, Violante B. Relationship between job satisfaction, and

17 stress, burnout and psychosocial factors among nurses working in different health settings.

18 G Ital Med Lav Ergon. 2009;31(1):A36-A44.

19 Berking M, Meier C, Wupperman P. Enhancing emotion-regulation skills in police

20 officers: results of a pilot controlled study. Behav Ther. 2010;41(3):329-339.

21 Ozer DJ, Benet-Martínez V. Personality and the prediction of consequential

22 outcomes. Annu Rev Psychol. 2006;57:401-21.

23 67. Lahey BB. Public health significance of neuroticism. Am Psychol. 2009; 64(4): 241-

24 256.

Formatted: English (U.S.)

Formatted: Indent: Left: 0.5", No bullets or numbering

STROBE 2007 (v4) Statement—Checklist of items that should be included in reports of *cross-sectional studies*

| Section/Topic                | Item # | Recommendation                                                                                                                                                                       | Reported on page # |
|------------------------------|--------|--------------------------------------------------------------------------------------------------------------------------------------------------------------------------------------|--------------------|
| Title and abstract           | 1      | (a) Indicate the study's design with a commonly used term in the title or the abstract                                                                                               | 1                  |
|                              |        | (b) Provide in the abstract an informative and balanced summary of what was done and what was found                                                                                  | 2                  |
| <b>Introduction</b>          |        |                                                                                                                                                                                      |                    |
| Background/rationale         | 2      | Explain the scientific background and rationale for the investigation being reported                                                                                                 | 4-7                |
| Objectives                   | 3      | State specific objectives, including any prespecified hypotheses                                                                                                                     | 8                  |
| <b>Methods</b>               |        |                                                                                                                                                                                      |                    |
| Study design                 | 4      | Present key elements of study design early in the paper                                                                                                                              | 8                  |
| Setting                      | 5      | Describe the setting, locations, and relevant dates, including periods of recruitment, exposure, follow-up, and data collection                                                      | 8-10               |
| Participants                 | 6      | (a) Give the eligibility criteria, and the sources and methods of selection of participants                                                                                          | 8-10               |
| Variables                    | 7      | Clearly define all outcomes, exposures, predictors, potential confounders, and effect modifiers. Give diagnostic criteria, if applicable                                             | 9-10               |
| Data sources/<br>measurement | 8*     | For each variable of interest, give sources of data and details of methods of assessment (measurement). Describe comparability of assessment methods if there is more than one group | 8-10               |
| Bias                         | 9      | Describe any efforts to address potential sources of bias                                                                                                                            | 10                 |
| Study size                   | 10     | Explain how the study size was arrived at                                                                                                                                            | 8                  |
| Quantitative variables       | 11     | Explain how quantitative variables were handled in the analyses. If applicable, describe which groupings were chosen and why                                                         | 10-11              |
| Statistical methods          | 12     | (a) Describe all statistical methods, including those used to control for confounding                                                                                                | 10-11              |
|                              |        | (b) Describe any methods used to examine subgroups and interactions                                                                                                                  | 11                 |
|                              |        | (c) Explain how missing data were addressed                                                                                                                                          | 8; 10-11           |
|                              |        | (d) If applicable, describe analytical methods taking account of sampling strategy                                                                                                   | 11                 |
|                              |        | (e) Describe any sensitivity analyses                                                                                                                                                | 11                 |
| <b>Results</b>               |        |                                                                                                                                                                                      |                    |

|                          |     |                                                                                                                                                                                                              |         |
|--------------------------|-----|--------------------------------------------------------------------------------------------------------------------------------------------------------------------------------------------------------------|---------|
| Participants             | 13* | (a) Report numbers of individuals at each stage of study—eg numbers potentially eligible, examined for eligibility, confirmed eligible, included in the study, completing follow-up, and analysed            | Tab 1   |
|                          |     | (b) Give reasons for non-participation at each stage                                                                                                                                                         | 8       |
|                          |     | (c) Consider use of a flow diagram                                                                                                                                                                           | n/a     |
| Descriptive data         | 14* | (a) Give characteristics of study participants (eg demographic, clinical, social) and information on exposures and potential confounders                                                                     | Tab 1   |
|                          |     | (b) Indicate number of participants with missing data for each variable of interest                                                                                                                          | n/a     |
| Outcome data             | 15* | Report numbers of outcome events or summary measures                                                                                                                                                         | 12-13   |
| Main results             | 16  | (a) Give unadjusted estimates and, if applicable, confounder-adjusted estimates and their precision (eg, 95% confidence interval). Make clear which confounders were adjusted for and why they were included | Tab 2-3 |
|                          |     | (b) Report category boundaries when continuous variables were categorized                                                                                                                                    | 12-13   |
|                          |     | (c) If relevant, consider translating estimates of relative risk into absolute risk for a meaningful time period                                                                                             | n/a     |
| Other analyses           | 17  | Report other analyses done—eg analyses of subgroups and interactions, and sensitivity analyses                                                                                                               | n/a     |
| <b>Discussion</b>        |     |                                                                                                                                                                                                              |         |
| Key results              | 18  | Summarise key results with reference to study objectives                                                                                                                                                     | 2       |
| Limitations              | 19  | Discuss limitations of the study, taking into account sources of potential bias or imprecision. Discuss both direction and magnitude of any potential bias                                                   | 13-15   |
| Interpretation           | 20  | Give a cautious overall interpretation of results considering objectives, limitations, multiplicity of analyses, results from similar studies, and other relevant evidence                                   | 14      |
| Generalisability         | 21  | Discuss the generalisability (external validity) of the study results                                                                                                                                        | 14-15   |
| <b>Other information</b> |     |                                                                                                                                                                                                              |         |
| Funding                  | 22  | Give the source of funding and the role of the funders for the present study and, if applicable, for the original study on which the present article is based                                                | 1       |

\*Give information separately for cases and controls in case-control studies and, if applicable, for exposed and unexposed groups in cohort and cross-sectional studies.

**Note:** An Explanation and Elaboration article discusses each checklist item and gives methodological background and published examples of transparent reporting. The STROBE checklist is best used in conjunction with this article (freely available on the Web sites of PLoS Medicine at <http://www.plosmedicine.org/>, Annals of Internal Medicine at <http://www.annals.org/>, and Epidemiology at <http://www.epidem.com/>). Information on the STROBE Initiative is available at [www.strobe-statement.org](http://www.strobe-statement.org).
